# Supplementary material for: Natural ten-membered lactones: sources, structural diversity, biological activity, and intriguing future
Source: Royal Society of Chemistry journal article supplement (doi:10.1039/d3np00013c), 2023-10-27
Supplement: d3np00013c1.pdf [file d3np00013c1.pdf]

**Table S1.** Natural ten-membered lactones and their origins

| # | Compounds                                                                              | Natural Source                                                                                   | Tested Activity*                                                                                                                                                          | Taxonomy<br>Kingdom / Phylum<br>(Class, Order) | Molecular<br>Formula                             | M/W,<br>Da | Comments                                                                                                                                                                                                                                                                                            |
|---|----------------------------------------------------------------------------------------|--------------------------------------------------------------------------------------------------|---------------------------------------------------------------------------------------------------------------------------------------------------------------------------|------------------------------------------------|--------------------------------------------------|------------|-----------------------------------------------------------------------------------------------------------------------------------------------------------------------------------------------------------------------------------------------------------------------------------------------------|
| 1 | (3Z,5S,6E,9S,10R)-8-chloro-5,9-dihydroxy-10-methyl-5,8,9,10-tetrahydro-2H-oxecin-2-one | <i>Curvularia</i> sp. 768 <sup>1</sup><br><i>Rousoella siamensis</i><br>SYSU-MS4723 <sup>2</sup> | Antialgal – n/a <sup>1</sup><br>Antibacterial – n/a <sup>1</sup><br>Antifungal – n/a <sup>1</sup><br>Anti-inflammatory – n/a <sup>2</sup><br>Cytotoxic – n/a <sup>2</sup> | Fungi /<br><i>Ascomycota</i>                   | C <sub>10</sub> H <sub>13</sub> ClO <sub>4</sub> | 232        | A chlorine-containing TML, a possible artifact formed during extraction <i>Curvularia</i> sp. 768 with methylene chloride. <sup>1</sup> However, its isolation from the ethyl acetate extract of <i>Rousoella siamensis</i> SYSU-MS4723 <sup>2</sup> indicated the natural origin of this compound. |
| 2 | (4S,5R,10R)-4-hydroxy-5-methoxy-10-methyloxecane-2,7-dione                             | <i>Cordyceps militaris</i><br>BCC 2816 <sup>3</sup>                                              | Antiparasitic – n/a <sup>3</sup>                                                                                                                                          | Fungi /<br><i>Ascomycota</i>                   | C <sub>11</sub> H <sub>18</sub> O <sub>5</sub>   | 230        |                                                                                                                                                                                                                                                                                                     |
| 3 | (4S,5S,10R)-4-hydroxy-5-methoxy-10-methyloxecane-2,7-dione                             | <i>Cordyceps militaris</i><br>BCC 2816 <sup>3</sup>                                              | Antiparasitic – n/a <sup>3</sup>                                                                                                                                          | Fungi /<br><i>Ascomycota</i>                   | C <sub>11</sub> H <sub>18</sub> O <sub>5</sub>   | 230        |                                                                                                                                                                                                                                                                                                     |
| 4 | (4S,7R,10R,E)-4,7-dihydroxy-10-methyl-3,4,7,8,9,10-hexahydro-2H-oxecin-2-one           | <i>Cordyceps militaris</i><br>BCC 2816 <sup>3</sup>                                              | Antiparasitic – n/a <sup>3</sup>                                                                                                                                          | Fungi /<br><i>Ascomycota</i>                   | C <sub>10</sub> H <sub>16</sub> O <sub>4</sub>   | 200        |                                                                                                                                                                                                                                                                                                     |
| 5 | (5S,8S,9S,10R,E)-10-heptyl-5,8,9-trihydroxy-3,4,5,8,9,10-hexahydro-2H-oxecin-2-one     | <i>Xylaria feejeensis</i><br>MG871188 <sup>4</sup>                                               | Osteoclastogenesis inhibitory – a <sup>4</sup>                                                                                                                            | Fungi /<br><i>Ascomycota</i>                   | C <sub>16</sub> H <sub>28</sub> O <sub>5</sub>   | 300        |                                                                                                                                                                                                                                                                                                     |
| 6 | (5Z,9S)-tetradec-5-en-9-olide                                                          | <i>Silvestritermes minutus</i> <sup>5</sup>                                                      | Behavior test – n/a <sup>5</sup>                                                                                                                                          | Animalia /<br><i>Insecta</i>                   | C <sub>14</sub> H <sub>24</sub> O <sub>2</sub>   | 224        |                                                                                                                                                                                                                                                                                                     |
| 7 | (6S,7R,9R)-6,7-dihydroxy-                                                              | <i>Phomopsis</i> sp.                                                                             | Plant growth inhibition –                                                                                                                                                 | Fungi /                                        | C <sub>12</sub> H <sub>20</sub> O <sub>4</sub>   | 228        |                                                                                                                                                                                                                                                                                                     |

|    |                                                                                 |                                                                                                                                                                                                              |                                                                                                                     |                                    |                                                 |     |
|----|---------------------------------------------------------------------------------|--------------------------------------------------------------------------------------------------------------------------------------------------------------------------------------------------------------|---------------------------------------------------------------------------------------------------------------------|------------------------------------|-------------------------------------------------|-----|
|    | 9-propylnon-4-eno-9-lactone                                                     | HCCB03520 <sup>6</sup>                                                                                                                                                                                       | a <sup>6</sup>                                                                                                      | <i>Ascomycota</i>                  |                                                 |     |
| 8  | (R)-2,4-Dihydroxy-7-methyl-7,8,9,10,11,12-hexahydro-6-oxa-benzocyclodecen-5-one | <i>Chaetosphaeronema hispidulur</i> TS-8-1 <sup>7</sup>                                                                                                                                                      | Cytotoxic – a <sup>7</sup><br>Plant growth inhibition – a <sup>7</sup>                                              | Fungi /<br><i>Ascomycota</i>       | C <sub>14</sub> H <sub>18</sub> O <sub>4</sub>  | 250 |
| 9  | 18-deoxynargenicin A1 (antibiotic 367c)                                         | <i>Saccharopolyspora hirsute</i> 367 (UC® 8106, NRRL 10245) <sup>8</sup>                                                                                                                                     | Antibacterial – a <sup>8</sup>                                                                                      | Bacteria /<br><i>Actinomycetia</i> | C <sub>28</sub> H <sub>37</sub> NO <sub>7</sub> | 499 |
| 10 | 18-deoxynodusmicin A1 (U-61,732)                                                | <i>Saccharopolyspora hirsuta</i> 367, NRRL 12045 <sup>9</sup>                                                                                                                                                | Antibacterial – a <sup>9</sup>                                                                                      | Bacteria /<br><i>Actinomycetia</i> | C <sub>28</sub> H <sub>37</sub> NO <sub>7</sub> | 499 |
| 11 | 2-epi-herbarumin II                                                             | <i>Didymella pinodes</i> CO-99 <sup>10</sup><br><i>Phoma bellidis</i> HGX2 <sup>11</sup><br><i>Pestalotiopsis clavispora</i> <sup>12</sup><br><i>Paraphaeosphaeria recurvifoliae</i> EML-PL001 <sup>13</sup> | Cytotoxic – n/a <sup>11, 12</sup><br>Enzyme inhibitory – a <sup>13</sup><br>Phytotoxic activity – n/a <sup>10</sup> | Fungi /<br><i>Ascomycota</i>       | C <sub>12</sub> H <sub>20</sub> O <sub>5</sub>  | 244 |
| 12 | 3,4-deoxy-3,4-didehydromultiplolide A                                           | <i>Phomopsis</i> sp. NXZ-05 <sup>14</sup>                                                                                                                                                                    | Antifungal – n/a <sup>14</sup>                                                                                      | Fungi /<br><i>Ascomycota</i>       | C <sub>10</sub> H <sub>14</sub> O <sub>4</sub>  | 198 |
| 13 | 3R,5R-sonnerlactone (2R,4R-sonnerlactone)                                       | Endophytic fungus Zh6-B1 <sup>15</sup><br><i>Chaetosphaeronema hispidulum</i> TS-8-1 <sup>16</sup>                                                                                                           | Antiproliferative – a <sup>15</sup>                                                                                 | Fungi /<br><i>Ascomycota</i>       | C <sub>14</sub> H <sub>18</sub> O <sub>5</sub>  | 266 |
| 14 | 3R,5S-sonnerlactone (2R,4S-sonnerlactone)                                       | Endophytic fungus Zh6-B1 <sup>15</sup><br><i>Chaetosphaeronema hispidulum</i> TS-8-1 <sup>16</sup>                                                                                                           | Antiproliferative – a <sup>15</sup><br>Cytotoxic – a <sup>16</sup>                                                  | Fungi /<br><i>Ascomycota</i>       | C <sub>14</sub> H <sub>18</sub> O <sub>5</sub>  | 266 |
| 15 | 5,6-dihydro-5,6-epoxymultiplolide A                                             | <i>Phomopsis</i> sp. NXZ-05 <sup>14</sup>                                                                                                                                                                    | Antifungal – n/a <sup>14</sup><br>Cytotoxic – n/a <sup>14</sup><br>Enzyme inhibitory – n/a <sup>14</sup>            | Fungi /<br><i>Ascomycota</i>       | C <sub>10</sub> H <sub>14</sub> O <sub>6</sub>  | 230 |

|           |                                                        |                                                                                                                                                                                          |                                                                                                                                                               |                              |                                                |     |
|-----------|--------------------------------------------------------|------------------------------------------------------------------------------------------------------------------------------------------------------------------------------------------|---------------------------------------------------------------------------------------------------------------------------------------------------------------|------------------------------|------------------------------------------------|-----|
| <b>16</b> | 5,6-dihydropinolidoxin                                 | <i>Ascochyta pinodes</i><br>ITEM 1094 <sup>17</sup><br><i>Didymella pinodes</i><br>CO-99 <sup>10</sup>                                                                                   | Antifungal – n/a <sup>17</sup><br>Mycotoxic – n/a <sup>17</sup><br>Phytotoxic – a <sup>17</sup>                                                               | Fungi /<br><i>Ascomycota</i> | C <sub>18</sub> H <sub>28</sub> O <sub>6</sub> | 340 |
| <b>17</b> | 5,6-epoxypinolidoxin                                   | <i>Ascochyta pinodes</i><br>ITEM 1094 <sup>17</sup><br><i>Didymella pinodes</i><br>CO-99 <sup>10</sup>                                                                                   | Antifungal – n/a <sup>17</sup><br>Cytotoxic – n/a <sup>11</sup><br>Mycotoxic – n/a <sup>17</sup><br>Phytotoxic – n/a <sup>17</sup>                            | Fungi /<br><i>Ascomycota</i> | C <sub>18</sub> H <sub>26</sub> O <sub>7</sub> | 354 |
| <b>18</b> | 7-epi-pinolidoxin                                      | <i>Ascochyta pinodes</i><br>ITEM 1094 <sup>17</sup><br><i>Didymella pinodes</i><br>CO-99 <sup>10</sup>                                                                                   | Antifungal – n/a <sup>17</sup><br>Mycotoxic – n/a <sup>17</sup><br>Phytotoxic – a <sup>17</sup>                                                               | Fungi /<br><i>Ascomycota</i> | C <sub>18</sub> H <sub>26</sub> O <sub>6</sub> | 338 |
| <b>19</b> | 7-O-acetylmultiplolide A<br>(7α-acetoxymultiplolide A) | <i>Pseudorhizophila mangelotii</i> gen. et<br>comb. nov. CBS<br>419.67 <sup>18</sup><br><i>Phomopsis</i> sp. YM<br>311483 <sup>19</sup>                                                  | Antibacterial – n/a <sup>18</sup><br>Antifungal – a <sup>19</sup> , n/a <sup>18</sup><br>Cytotoxic – n/a <sup>18</sup>                                        | Fungi /<br><i>Ascomycota</i> | C <sub>12</sub> H <sub>16</sub> O <sub>6</sub> | 256 |
| <b>20</b> | 7α,8α-dihydroxy-3,5-<br>decadien-10-olide              | <i>Phomopsis</i> sp. YM<br>311483 <sup>19</sup>                                                                                                                                          | Antifungal – a <sup>19</sup>                                                                                                                                  | Fungi /<br><i>Ascomycota</i> | C <sub>10</sub> H <sub>14</sub> O <sub>4</sub> | 198 |
| <b>21</b> | 8-O-acetyl-5,6-dihydro-<br>5,6-epoxy-multiplolide A    | <i>Phomopsis</i> sp. NXZ-<br>05 <sup>14</sup>                                                                                                                                            | Antifungal – n/a <sup>14</sup><br>Cytotoxic – n/a <sup>14</sup><br>Enzyme inhibitory – n/a <sup>14</sup>                                                      | Fungi /<br><i>Ascomycota</i> | C <sub>12</sub> H <sub>16</sub> O <sub>7</sub> | 272 |
| <b>22</b> | 8-O-acetylmultiplolide A<br>(8α-acetoxymultiplolide A) | <i>Pseudorhizophila mangelotii</i> gen. et<br>comb. nov. CBS<br>419.67 <sup>18</sup><br><i>Phomopsis</i> sp. YM<br>311483 <sup>19</sup><br><i>Phomopsis</i> sp. NXZ-<br>05 <sup>14</sup> | Antibacterial – n/a <sup>18</sup><br>Antifungal – a <sup>19</sup> , n/a <sup>18</sup><br>Cytotoxic – n/a <sup>18</sup><br>Enzyme inhibitory – a <sup>14</sup> | Fungi /<br><i>Ascomycota</i> | C <sub>12</sub> H <sub>16</sub> O <sub>6</sub> | 256 |
| <b>23</b> | 8α-acetoxy-5α-hydroxy-7-<br>oxodecan-10-olide          | <i>Phomopsis</i> sp. YM<br>311483 <sup>19</sup>                                                                                                                                          | Antifungal – a <sup>19</sup>                                                                                                                                  | Fungi /<br><i>Ascomycota</i> | C <sub>12</sub> H <sub>18</sub> O <sub>6</sub> | 258 |
| <b>24</b> | Achaetolide                                            | <i>Achaetomium cristalliferum</i> PC                                                                                                                                                     | Not tested                                                                                                                                                    | Fungi /<br><i>Ascomycota</i> | C <sub>16</sub> H <sub>28</sub> O <sub>5</sub> | 300 |

|    |                     |                                                                                                                      |                                                                                             |                                 |                                                |     |                                                                                        |
|----|---------------------|----------------------------------------------------------------------------------------------------------------------|---------------------------------------------------------------------------------------------|---------------------------------|------------------------------------------------|-----|----------------------------------------------------------------------------------------|
|    |                     | 3252 <sup>20</sup><br><i>Achaetomium strumarium</i> IMI<br>82624 <sup>6</sup><br><i>Ophiobolus</i> sp. <sup>21</sup> |                                                                                             |                                 |                                                |     |                                                                                        |
| 25 | Achaetolide-II      | <i>Helminthosporium velutinum</i> TS28 <sup>22</sup>                                                                 | Antifungal – a <sup>22</sup><br>Cytotoxic – a <sup>22</sup><br>Phytotoxic – a <sup>22</sup> | Fungi /<br><i>Ascomycota</i>    | C <sub>21</sub> H <sub>36</sub> O <sub>7</sub> | 400 |                                                                                        |
| 26 | Aldaulactone        | <i>Alternaria dauci</i> <sup>23, 24</sup>                                                                            | Cytotoxic – a <sup>23</sup><br>Phytotoxic - a <sup>24</sup>                                 | Fungi /<br><i>Ascomycota</i>    | C <sub>15</sub> H <sub>17</sub> O <sub>6</sub> | 292 |                                                                                        |
| 27 | Ascidiatrienolide A | <i>Didemnum candidum</i> <sup>25, 26</sup>                                                                           | Not tested                                                                                  | Animalia /<br><i>Ascidiacea</i> | C <sub>20</sub> H <sub>30</sub> O <sub>3</sub> | 318 | Was first described as a nine-membered lactone, then was revised as a ten-membered one |
| 28 | Ascidiatrienolide B | <i>Didemnum candidum</i> <sup>25</sup>                                                                               | Not tested                                                                                  | Animalia /<br><i>Ascidiacea</i> | C <sub>20</sub> H <sub>30</sub> O <sub>3</sub> | 320 | Probably needs the structural revision                                                 |
| 29 | Ascidiatrienolide C | <i>Didemnum candidum</i> <sup>25</sup>                                                                               | Not tested                                                                                  | Animalia /<br><i>Ascidiacea</i> | C <sub>20</sub> H <sub>30</sub> O <sub>3</sub> | 320 | Probably needs the structural revision                                                 |
| 30 | Aspinolide A        | <i>Aspergillus ochraceus</i> DSM-7428 <sup>27</sup>                                                                  | Not tested                                                                                  | Fungi /<br><i>Ascomycota</i>    | C <sub>10</sub> H <sub>16</sub> O <sub>3</sub> | 184 |                                                                                        |
| 31 | Aspinolide B        | <i>Aspergillus ochraceus</i> DSM-7428 <sup>27</sup><br><i>Trichoderma arundinaceum</i> IBT 40837 <sup>28, 29</sup>   | Antifungal – n/a <sup>28</sup><br>Plant growth promotion – a <sup>28</sup>                  | Fungi /<br><i>Ascomycota</i>    | C <sub>14</sub> H <sub>20</sub> O <sub>6</sub> | 284 |                                                                                        |
| 32 | Aspinolide C        | <i>Aspergillus ochraceus</i> DSM-7428 <sup>27</sup><br><i>Trichoderma arundinaceum</i> IBT 40837 <sup>28, 29</sup>   | Antifungal – a <sup>28</sup><br>Plant growth inhibition – a <sup>28</sup>                   | Fungi /<br><i>Ascomycota</i>    | C <sub>14</sub> H <sub>18</sub> O <sub>6</sub> | 282 |                                                                                        |
| 33 | Aspinolide D        | <i>Trichoderma</i>                                                                                                   | Not tested                                                                                  | Fungi /                         | C <sub>14</sub> H <sub>20</sub> O <sub>5</sub> | 268 |                                                                                        |

|           |                    |                                                                                           |                                                                     |                              |                                                |     |
|-----------|--------------------|-------------------------------------------------------------------------------------------|---------------------------------------------------------------------|------------------------------|------------------------------------------------|-----|
|           |                    | <i>arundinaceum</i> IBT<br>40837 <sup>28</sup>                                            |                                                                     | <i>Ascomycota</i>            |                                                |     |
| <b>34</b> | Aspinolide E       | <i>Trichoderma arundinaceum</i> IBT<br>40837 <sup>28</sup>                                | Not tested                                                          | Fungi /<br><i>Ascomycota</i> | C <sub>14</sub> H <sub>22</sub> O <sub>6</sub> | 286 |
| <b>35</b> | Aspinolide F       | <i>Trichoderma arundinaceum</i> IBT<br>40837 <sup>28</sup>                                | Not tested                                                          | Fungi /<br><i>Ascomycota</i> | C <sub>16</sub> H <sub>22</sub> O <sub>8</sub> | 342 |
| <b>36</b> | Aspinolide G       | <i>Trichoderma arundinaceum</i> IBT<br>40837 <sup>28</sup>                                | Not tested                                                          | Fungi /<br><i>Ascomycota</i> | C <sub>15</sub> H <sub>22</sub> O <sub>7</sub> | 314 |
| <b>37</b> | Bellidisin B       | <i>Phoma bellidis</i><br>HGX2 <sup>11</sup>                                               | Cytotoxic – n/a <sup>11</sup>                                       | Fungi /<br><i>Ascomycota</i> | C <sub>20</sub> H <sub>28</sub> O <sub>7</sub> | 380 |
| <b>38</b> | Bellidisin C       | <i>Phoma bellidis</i><br>HGX2 <sup>11</sup>                                               | Cytotoxic – n/a <sup>11</sup>                                       | Fungi /<br><i>Ascomycota</i> | C <sub>20</sub> H <sub>30</sub> O <sub>6</sub> | 366 |
| <b>39</b> | Bellidisin D       | <i>Phoma bellidis</i><br>HGX2 <sup>11</sup>                                               | Cytotoxic – a <sup>11</sup>                                         | Fungi /<br><i>Ascomycota</i> | C <sub>18</sub> H <sub>26</sub> O <sub>7</sub> | 354 |
| <b>40</b> | Botryolide A       | <i>Botryotrichum</i> sp.<br>NRRL 38180<br>( <i>Chaetomium piluliferum</i> ) <sup>30</sup> | Antibacterial – n/a <sup>30</sup><br>Antifungal – n/a <sup>30</sup> | Fungi /<br><i>Ascomycota</i> | C <sub>10</sub> H <sub>14</sub> O <sub>5</sub> | 214 |
| <b>41</b> | Botryolide B       | <i>Botryotrichum</i> sp.<br>NRRL 38180<br>( <i>Chaetomium piluliferum</i> ) <sup>30</sup> | Antibacterial – n/a <sup>30</sup><br>Antifungal – n/a <sup>30</sup> | Fungi /<br><i>Ascomycota</i> | C <sub>10</sub> H <sub>14</sub> O <sub>4</sub> | 198 |
| <b>42</b> | Botryolide C       | <i>Botryotrichum</i> sp.<br>NRRL 38180<br>( <i>Chaetomium piluliferum</i> ) <sup>30</sup> | Antibacterial – n/a <sup>30</sup><br>Antifungal – n/a <sup>30</sup> | Fungi /<br><i>Ascomycota</i> | C <sub>13</sub> H <sub>16</sub> O <sub>6</sub> | 268 |
| <b>43</b> | Botryolide D       | <i>Botryotrichum</i> sp.<br>NRRL 38180<br>( <i>Chaetomium piluliferum</i> ) <sup>30</sup> | Antibacterial – n/a <sup>30</sup><br>Antifungal – n/a <sup>30</sup> | Fungi /<br><i>Ascomycota</i> | C <sub>10</sub> H <sub>16</sub> O <sub>5</sub> | 216 |
| <b>44</b> | Cephalosporolide B | <i>Cephalosporium aphidicola</i> ACC 3490 <sup>31</sup>                                   | Not tested                                                          | Fungi /<br><i>Ascomycota</i> | C <sub>10</sub> H <sub>14</sub> O <sub>4</sub> | 198 |

|    |                                                              |                                                                                                                                                                                                                                                                     |                                                                                                                                                                                      |                                    |                                                 |     |                                                                    |
|----|--------------------------------------------------------------|---------------------------------------------------------------------------------------------------------------------------------------------------------------------------------------------------------------------------------------------------------------------|--------------------------------------------------------------------------------------------------------------------------------------------------------------------------------------|------------------------------------|-------------------------------------------------|-----|--------------------------------------------------------------------|
| 45 | Cephalosporolide C =<br>Bassianolone =<br>Cephalosporolide J | <i>Cephalosporium aphidicola</i> ACC 3490 <sup>31</sup><br><i>Cordyceps militaris</i> BCC 2816 <sup>3</sup><br><i>Beauveria bassiana</i> <sup>32</sup><br><i>Isaria fumosorosea</i> ACCC 37775 <sup>33</sup><br><i>Armillaria tabescens</i> JNB-OZ344 <sup>34</sup> | Antiparasitic – n/a <sup>3</sup><br>Antibacterial – a <sup>32</sup> , n/a <sup>34</sup><br>Antifungal – a <sup>32</sup> , n/a <sup>34</sup><br>Enzyme inhibitory – n/a <sup>33</sup> | Fungi /<br><i>Ascomycota</i>       | C <sub>10</sub> H <sub>16</sub> O <sub>5</sub>  | 216 | The identity has been confirmed by Song et al., 2014 <sup>35</sup> |
| 46 | Cephalosporolide G                                           | <i>Cephalosporium aphidicola</i> IMI 68689 <sup>31</sup>                                                                                                                                                                                                            | Not tested                                                                                                                                                                           | Fungi /<br><i>Ascomycota</i>       | C <sub>10</sub> H <sub>16</sub> O <sub>5</sub>  | 216 |                                                                    |
| 47 | Cétolactone<br>(Jasmine ketolactone)                         | <i>Jasminum grandiflorum</i> L. <sup>36</sup>                                                                                                                                                                                                                       | Not tested                                                                                                                                                                           | Plantae /<br><i>Lamiales</i>       | C <sub>12</sub> H <sub>16</sub> O <sub>3</sub>  | 208 |                                                                    |
| 48 | Colletofragarone A1                                          | <i>Colletotrichum fragariae</i> <sup>37</sup>                                                                                                                                                                                                                       | Not tested                                                                                                                                                                           | Fungi /<br><i>Ascomycota</i>       | C <sub>22</sub> H <sub>26</sub> O <sub>6</sub>  | 386 |                                                                    |
| 49 | Colletofragarone A2                                          | <i>Colletotrichum fragariae</i> <sup>37</sup><br><i>Colletotrichum</i> sp.<br>13S020 <sup>38</sup>                                                                                                                                                                  | Cytotoxic – a <sup>38</sup>                                                                                                                                                          | Fungi /<br><i>Ascomycota</i>       | C <sub>22</sub> H <sub>26</sub> O <sub>6</sub>  | 386 |                                                                    |
| 50 | Colletoin A                                                  | <i>Colletotrichum</i> sp.<br>13S020 <sup>38</sup>                                                                                                                                                                                                                   | Cytotoxic – a <sup>38</sup>                                                                                                                                                          | Fungi /<br><i>Ascomycota</i>       | C <sub>22</sub> H <sub>26</sub> O <sub>4</sub>  | 354 |                                                                    |
| 51 | Colletoin B                                                  | <i>Colletotrichum</i> sp.<br>13S020 <sup>38</sup>                                                                                                                                                                                                                   | Cytotoxic – a <sup>38</sup>                                                                                                                                                          | Fungi /<br><i>Ascomycota</i>       | C <sub>22</sub> H <sub>28</sub> O <sub>6</sub>  | 404 |                                                                    |
| 52 | Colletoin C                                                  | <i>Colletotrichum</i> sp.<br>13S020 <sup>38</sup>                                                                                                                                                                                                                   | Cytotoxic – a <sup>38</sup>                                                                                                                                                          | Fungi /<br><i>Ascomycota</i>       | C <sub>22</sub> H <sub>28</sub> O <sub>7</sub>  | 404 |                                                                    |
| 53 | Colletotrichalactone C -<br>Ca                               | <i>Colletotrichum</i> sp. JS-<br>0361 <sup>39</sup>                                                                                                                                                                                                                 | Cytotoxic – a <sup>39</sup>                                                                                                                                                          | Fungi /<br><i>Ascomycota</i>       | C <sub>21</sub> H <sub>28</sub> O <sub>8</sub>  | 408 |                                                                    |
| 54 | Colletotrichalactone A -<br>Aa                               | <i>Colletotrichum</i> sp. JS-<br>0361 <sup>39</sup>                                                                                                                                                                                                                 | Cytotoxic – a <sup>39</sup>                                                                                                                                                          | Fungi /<br><i>Ascomycota</i>       | C <sub>20</sub> H <sub>20</sub> O <sub>6</sub>  | 356 |                                                                    |
| 55 | Colletotrichalactone B                                       | <i>Colletotrichum</i> sp. JS-<br>0361 <sup>39</sup>                                                                                                                                                                                                                 | Cytotoxic – a <sup>39</sup>                                                                                                                                                          | Fungi /<br><i>Ascomycota</i>       | C <sub>21</sub> H <sub>24</sub> O <sub>7</sub>  | 388 |                                                                    |
| 56 | Colletotriolide                                              | <i>Colletotrichum</i> sp. <sup>40</sup>                                                                                                                                                                                                                             | Antibacterial – a <sup>40</sup><br>Cytotoxic – n/a <sup>40</sup>                                                                                                                     | Fungi /<br><i>Ascomycota</i>       | C <sub>18</sub> H <sub>32</sub> O <sub>5</sub>  | 328 |                                                                    |
| 57 | Coloradocin =<br>Luminamicin                                 | <i>Nocardioides</i> OMR-<br>59 <sup>41</sup>                                                                                                                                                                                                                        | Antibacterial – a <sup>41</sup> , <sup>43</sup><br>Acute toxicity - n/a <sup>41</sup> , <sup>43</sup>                                                                                | Bacteria /<br><i>Actinomycetia</i> | C <sub>32</sub> H <sub>38</sub> O <sub>12</sub> | 614 | Coloradocin is related to a small                                  |

|    |                                                     |                                                                                                                                                  |                                                                                                                                                                                                                                                                   |                              |                                                |     |                                                                                                                                                                             |
|----|-----------------------------------------------------|--------------------------------------------------------------------------------------------------------------------------------------------------|-------------------------------------------------------------------------------------------------------------------------------------------------------------------------------------------------------------------------------------------------------------------|------------------------------|------------------------------------------------|-----|-----------------------------------------------------------------------------------------------------------------------------------------------------------------------------|
|    |                                                     | <i>Actinoplanes coloradoensis</i> <sup>42</sup>                                                                                                  |                                                                                                                                                                                                                                                                   |                              |                                                |     | class of antibiotics which include nodusmicin and nargenicin and was shown to be identical to luminamicin for which no structure has been reported.                         |
| 58 | Cremonolide                                         | <i>Trichoderma cremeum</i> 506 <sup>44</sup>                                                                                                     | Antifungal – a <sup>44</sup><br>Plant growth promotion – a <sup>44</sup>                                                                                                                                                                                          | Fungi /<br><i>Ascomycota</i> | C <sub>16</sub> H <sub>22</sub> O <sub>7</sub> | 326 |                                                                                                                                                                             |
| 59 | Curvulalide                                         | <i>Curvularia</i> sp. PSU-F22 <sup>45</sup>                                                                                                      | Antibacterial – n/a <sup>45</sup><br>Antifungal – n/a <sup>45</sup>                                                                                                                                                                                               | Fungi /<br><i>Ascomycota</i> | C <sub>10</sub> H <sub>14</sub> O <sub>5</sub> | 214 |                                                                                                                                                                             |
| 60 | Curvulide A                                         | <i>Curvularia</i> sp. 768 <sup>1</sup>                                                                                                           | Not tested                                                                                                                                                                                                                                                        | Fungi /<br><i>Ascomycota</i> | C <sub>10</sub> H <sub>14</sub> O <sub>4</sub> | 198 |                                                                                                                                                                             |
| 61 | Curvulide B1 =<br>Stagonolide H<br>(or enantiomers) | <i>Curvularia</i> sp. 768 <sup>1</sup><br><i>Roussoella siamensis</i> SYSU-MS4723 <sup>2</sup><br><i>Stagonospora cirsii</i> C-163 <sup>46</sup> | Antialgal – n/a <sup>1</sup><br>Antibacterial – n/a <sup>1</sup><br>Antifungal – n/a <sup>1</sup><br>Anti-inflammatory – n/a <sup>2</sup><br>Antioxidant capacity – n/a <sup>2</sup><br>Phytotoxic – a <sup>46</sup><br>Plant growth inhibition – a <sup>46</sup> | Fungi /<br><i>Ascomycota</i> | C <sub>10</sub> H <sub>12</sub> O <sub>4</sub> | 196 | Greve et al., 2008 <sup>1</sup> described the absolute configuration of epimeric curvulides B1/B2. The relative configuration is described for stagonolide H. <sup>46</sup> |
| 62 | Curvulide B2                                        | <i>Curvularia</i> sp. 768 <sup>1</sup><br><i>Roussoella siamensis</i> SYSU-MS4723 <sup>2</sup>                                                   | Antialgal – n/a <sup>1</sup><br>Antibacterial – n/a <sup>1</sup><br>Antifungal – n/a <sup>1</sup><br>Anti-inflammatory – n/a <sup>2</sup><br>Antioxidant capacity – n/a <sup>2</sup><br>Cytotoxic – n/a <sup>2</sup>                                              | Fungi /<br><i>Ascomycota</i> | C <sub>10</sub> H <sub>12</sub> O <sub>4</sub> | 196 |                                                                                                                                                                             |
| 63 | Cytospolide A                                       | <i>Cytospora</i> sp. ZW02 <sup>47</sup>                                                                                                          | Cytotoxic – a <sup>47</sup>                                                                                                                                                                                                                                       | Fungi /<br><i>Ascomycota</i> | C <sub>17</sub> H <sub>28</sub> O <sub>5</sub> | 312 | C-2 methyl group in lactone core                                                                                                                                            |
| 64 | Cytospolide B                                       | <i>Cytospora</i> sp. ZW02 <sup>47</sup>                                                                                                          | Cytotoxic – a <sup>47</sup>                                                                                                                                                                                                                                       | Fungi /<br><i>Ascomycota</i> | C <sub>17</sub> H <sub>28</sub> O <sub>5</sub> | 312 | C-2 methyl group in lactone core                                                                                                                                            |

|    |                       |                                                                                                                                                        |                                                                                                                                                                                                       |                              |                                                |     |                                     |
|----|-----------------------|--------------------------------------------------------------------------------------------------------------------------------------------------------|-------------------------------------------------------------------------------------------------------------------------------------------------------------------------------------------------------|------------------------------|------------------------------------------------|-----|-------------------------------------|
| 65 | Cytospolide C         | <i>Cytospora</i> sp.<br>ZW02 <sup>47</sup>                                                                                                             | Cytotoxic – a <sup>47</sup>                                                                                                                                                                           | Fungi /<br><i>Ascomycota</i> | C <sub>19</sub> H <sub>30</sub> O <sub>6</sub> | 354 | C-2 methyl group in<br>lactone core |
| 66 | Cytospolide D         | <i>Cytospora</i> sp.<br>ZW02 <sup>47</sup>                                                                                                             | Cytotoxic – a <sup>47</sup>                                                                                                                                                                           | Fungi /<br><i>Ascomycota</i> | C <sub>15</sub> H <sub>26</sub> O <sub>4</sub> | 270 | C-2 methyl group in<br>lactone core |
| 67 | Cytospolide E         | <i>Cytospora</i> sp.<br>ZW02 <sup>47</sup>                                                                                                             | Cytotoxic – a <sup>47</sup>                                                                                                                                                                           | Fungi /<br><i>Ascomycota</i> | C <sub>15</sub> H <sub>26</sub> O <sub>4</sub> | 270 | C-2 methyl group in<br>lactone core |
| 68 | Cytospolide F         | <i>Cytospora</i> sp.<br>ZW02 <sup>48</sup>                                                                                                             | Cytotoxic – a <sup>48</sup>                                                                                                                                                                           | Fungi /<br><i>Ascomycota</i> | C <sub>15</sub> H <sub>26</sub> O <sub>5</sub> | 286 | C-2 methyl group in<br>lactone core |
| 69 | Cytospolide G         | <i>Cytospora</i> sp.<br>ZW02 <sup>48</sup>                                                                                                             | Cytotoxic – a <sup>48</sup>                                                                                                                                                                           | Fungi /<br><i>Ascomycota</i> | C <sub>17</sub> H <sub>28</sub> O <sub>6</sub> | 328 | C-2 methyl group in<br>lactone core |
| 70 | Cytospolide H         | <i>Cytospora</i> sp.<br>ZW02 <sup>48</sup>                                                                                                             | Cytotoxic – a <sup>48</sup>                                                                                                                                                                           | Fungi /<br><i>Ascomycota</i> | C <sub>19</sub> H <sub>30</sub> O <sub>7</sub> | 370 | C-2 methyl group in<br>lactone core |
| 71 | Cytospolide I         | <i>Cytospora</i> sp.<br>ZW02 <sup>48</sup>                                                                                                             | Cytotoxic – a <sup>48</sup>                                                                                                                                                                           | Fungi /<br><i>Ascomycota</i> | C <sub>17</sub> H <sub>28</sub> O <sub>6</sub> | 328 | C-2 methyl group in<br>lactone core |
| 72 | Cytospolide J         | <i>Cytospora</i> sp.<br>ZW02 <sup>48</sup>                                                                                                             | Cytotoxic – a <sup>48</sup>                                                                                                                                                                           | Fungi /<br><i>Ascomycota</i> | C <sub>17</sub> H <sub>28</sub> O <sub>6</sub> | 328 | C-2 methyl group in<br>lactone core |
| 73 | Cytospolide K         | <i>Cytospora</i> sp.<br>ZW02 <sup>48</sup>                                                                                                             | Cytotoxic – a <sup>48</sup>                                                                                                                                                                           | Fungi /<br><i>Ascomycota</i> | C <sub>15</sub> H <sub>26</sub> O <sub>4</sub> | 270 | C-2 methyl group in<br>lactone core |
| 74 | Cytospolide L         | <i>Cytospora</i> sp.<br>ZW02 <sup>48</sup>                                                                                                             | Cytotoxic – a <sup>48</sup>                                                                                                                                                                           | Fungi /<br><i>Ascomycota</i> | C <sub>17</sub> H <sub>28</sub> O <sub>5</sub> | 312 | C-2 methyl group in<br>lactone core |
| 75 | Cytospolide M         | <i>Cytospora</i> sp.<br>ZW02 <sup>48</sup>                                                                                                             | Cytotoxic – a <sup>48</sup>                                                                                                                                                                           | Fungi /<br><i>Ascomycota</i> | C <sub>15</sub> H <sub>26</sub> O <sub>5</sub> | 286 | C-2 methyl group in<br>lactone core |
| 76 | Cytospolide N         | <i>Cytospora</i> sp.<br>ZW02 <sup>48</sup>                                                                                                             | Cytotoxic – a <sup>48</sup>                                                                                                                                                                           | Fungi /<br><i>Ascomycota</i> | C <sub>17</sub> H <sub>28</sub> O <sub>7</sub> | 344 | C-2 methyl group in<br>lactone core |
| 77 | Cytospolide O         | <i>Cytospora</i> sp.<br>ZW02 <sup>48</sup>                                                                                                             | Cytotoxic – a <sup>48</sup>                                                                                                                                                                           | Fungi /<br><i>Ascomycota</i> | C <sub>15</sub> H <sub>24</sub> O <sub>4</sub> | 268 | C-2 methyl group in<br>lactone core |
| 78 | Cytospolide P         | <i>Cytospora</i> sp.<br>ZW02 <sup>48</sup>                                                                                                             | Cytotoxic – a <sup>48</sup>                                                                                                                                                                           | Fungi /<br><i>Ascomycota</i> | C <sub>17</sub> H <sub>28</sub> O <sub>6</sub> | 328 | C-2 methyl group in<br>lactone core |
| 79 | Decarestrictine A1/A2 | <i>Penicillium</i><br><i>simplicissimum</i> FH-A<br>6090 <sup>49, 50</sup><br><i>Penicillium</i><br><i>corylophilum</i> FH-A<br>6360 <sup>49, 50</sup> | Antibacterial – n/a <sup>49</sup><br>Antifungal – n/a <sup>49</sup><br>Antiprotozoal – n/a <sup>49</sup><br>Antiviral – n/a <sup>49</sup><br>Cholesterol biosynthesis<br>inhibition – a <sup>49</sup> | Fungi /<br><i>Ascomycota</i> | C <sub>10</sub> H <sub>14</sub> O <sub>4</sub> | 198 |                                     |
| 80 | Decarestrictine B     | <i>Penicillium</i>                                                                                                                                     | Antibacterial – n/a <sup>49</sup>                                                                                                                                                                     | Fungi /                      | C <sub>10</sub> H <sub>14</sub> O <sub>5</sub> | 214 |                                     |

|           |                       |                                                                                                                                                                                                |                                                                                                                                                                                                       |                                                                          |                                                |     |
|-----------|-----------------------|------------------------------------------------------------------------------------------------------------------------------------------------------------------------------------------------|-------------------------------------------------------------------------------------------------------------------------------------------------------------------------------------------------------|--------------------------------------------------------------------------|------------------------------------------------|-----|
|           |                       | <i>simplicissimum</i> FH-A<br>6090 <sup>49, 50</sup><br><i>Penicillium</i><br><i>corylophilum</i> FH-A<br>6360 <sup>49, 50</sup><br><i>Pseudopestalotiopsis</i><br>sp. PSU-AMF45 <sup>51</sup> | Antifungal – n/a <sup>49</sup><br>Antiprotozoal – n/a <sup>49</sup><br>Antiviral – n/a <sup>49</sup><br>Cholesterol biosynthesis<br>inhibition – a <sup>49</sup>                                      | <i>Ascomycota</i>                                                        |                                                |     |
| <b>81</b> | Decarestrictine C1/C2 | <i>Penicillium</i><br><i>simplicissimum</i> FH-A<br>6090 <sup>49, 50</sup><br><i>Armillaria tabescens</i><br>JNB-OZ344 <sup>34</sup>                                                           | Antibacterial – n/a <sup>49</sup><br>Antifungal – n/a <sup>49</sup><br>Antiprotozoal – n/a <sup>49</sup><br>Antiviral – n/a <sup>49</sup><br>Cholesterol biosynthesis<br>inhibition – a <sup>49</sup> | Fungi /<br><i>Ascomycota</i>                                             | C <sub>10</sub> H <sub>16</sub> O <sub>4</sub> | 200 |
| <b>82</b> | Decarestrictine E     | <i>Penicillium</i><br><i>simplicissimum</i> FH-A<br>6090 <sup>52</sup>                                                                                                                         | Cholesterol biosynthesis<br>inhibition – n/a <sup>52</sup>                                                                                                                                            | Fungi /<br><i>Ascomycota</i>                                             | C <sub>11</sub> H <sub>16</sub> O <sub>5</sub> | 228 |
| <b>83</b> | Decarestrictine F     | <i>Penicillium</i><br><i>simplicissimum</i> FH-A<br>6090 <sup>52</sup>                                                                                                                         | Cholesterol biosynthesis<br>inhibition – n/a <sup>52</sup>                                                                                                                                            | Fungi /<br><i>Ascomycota</i>                                             | C <sub>10</sub> H <sub>12</sub> O <sub>4</sub> | 196 |
| <b>84</b> | Decarestrictine G     | <i>Penicillium</i><br><i>simplicissimum</i> FH-A<br>6090 <sup>52</sup>                                                                                                                         | Cholesterol biosynthesis<br>inhibition – n/a <sup>52</sup>                                                                                                                                            | Fungi /<br><i>Ascomycota</i>                                             | C <sub>10</sub> H <sub>16</sub> O <sub>5</sub> | 216 |
| <b>85</b> | Decarestrictine H     | <i>Penicillium</i><br><i>simplicissimum</i> FH-A<br>6090 <sup>52</sup>                                                                                                                         | Cholesterol biosynthesis<br>inhibition – n/a <sup>52</sup>                                                                                                                                            | Fungi /<br><i>Ascomycota</i>                                             | C <sub>10</sub> H <sub>14</sub> O <sub>4</sub> | 198 |
| <b>86</b> | Decarestrictine I     | <i>Penicillium</i><br><i>simplicissimum</i> FH-A<br>6090 <sup>52</sup>                                                                                                                         | Cholesterol biosynthesis<br>inhibition – n/a <sup>52</sup>                                                                                                                                            | Fungi /<br><i>Ascomycota</i>                                             | C <sub>10</sub> H <sub>14</sub> O <sub>4</sub> | 198 |
| <b>87</b> | Decarestrictine J     | <i>Penicillium</i><br><i>simplicissimum</i> FH-A<br>6090 <sup>52</sup><br><i>Pseudoxanthomonas</i><br><i>japonensis</i> ZKB-2 <sup>53</sup>                                                    | Cholesterol biosynthesis<br>inhibition – n/a <sup>52</sup>                                                                                                                                            | Fungi /<br><i>Ascomycota</i><br>Bacteria /<br><i>Gammaproteobacteria</i> | C <sub>10</sub> H <sub>16</sub> O <sub>4</sub> | 200 |
| <b>88</b> | Decarestrictine K     | <i>Penicillium</i><br><i>simplicissimum</i> FH-A                                                                                                                                               | Cholesterol biosynthesis<br>inhibition – n/a <sup>52</sup>                                                                                                                                            | Fungi /<br><i>Ascomycota</i>                                             | C <sub>10</sub> H <sub>14</sub> O <sub>4</sub> | 198 |

|            |                       |                                                                                      |                                                                                                                    |                                |                                                |     |
|------------|-----------------------|--------------------------------------------------------------------------------------|--------------------------------------------------------------------------------------------------------------------|--------------------------------|------------------------------------------------|-----|
|            |                       | 6090 <sup>52</sup>                                                                   |                                                                                                                    |                                |                                                |     |
| <b>89</b>  | Decarestrictine N     | <i>Penicillium simplicissimum</i> FH-A<br>6090 <sup>54</sup>                         | Not tested                                                                                                         | Fungi /<br><i>Ascomycota</i>   | C <sub>10</sub> H <sub>16</sub> O <sub>5</sub> | 216 |
| <b>90</b>  | Decarestrictine O     | <i>Penicillium simplicissimum</i> FH-A<br>6090 <sup>54</sup>                         | Not tested                                                                                                         | Fungi /<br><i>Ascomycota</i>   | C <sub>10</sub> H <sub>16</sub> O <sub>5</sub> | 216 |
| <b>91</b>  | Decarestrictine Q     | <i>Pseudopestalotiopsis</i> sp. PSU-AMF45 <sup>51</sup>                              | Not tested                                                                                                         | Fungi /<br><i>Ascomycota</i>   | C <sub>10</sub> H <sub>14</sub> O <sub>5</sub> | 214 |
| <b>92</b>  | Diaportheolide A      | <i>Diaporthe</i> sp. SXZ-19 <sup>55</sup>                                            | Antibacterial – a <sup>55</sup>                                                                                    | Fungi /<br><i>Ascomycota</i>   | C <sub>14</sub> H <sub>24</sub> O <sub>5</sub> | 272 |
| <b>93</b>  | Diaportheolide B      | <i>Diaporthe</i> sp. SXZ-19 <sup>55</sup>                                            | Antibacterial – a <sup>55</sup>                                                                                    | Fungi /<br><i>Ascomycota</i>   | C <sub>17</sub> H <sub>31</sub> O <sub>6</sub> | 330 |
| <b>94</b>  | Diaporthsin A         | <i>Diaporthe</i> sp. JC-J7 <sup>56</sup>                                             | Antihyperlipidemic – n/a <sup>56</sup><br>Cytotoxic – a <sup>56</sup>                                              | Fungi /<br><i>Ascomycota</i>   | C <sub>10</sub> H <sub>16</sub> O <sub>3</sub> | 184 |
| <b>95</b>  | Diaporthsin F         | <i>Diaporthe</i> sp. JC-J7 <sup>56</sup>                                             | Antihyperlipidemic – n/a <sup>56</sup><br>Cytotoxic – a <sup>56</sup>                                              | Fungi /<br><i>Ascomycota</i>   | C <sub>13</sub> H <sub>20</sub> O <sub>6</sub> | 272 |
| <b>96</b>  | Diaporthsin H         | <i>Diaporthe</i> sp. JC-J7 <sup>56</sup>                                             | Antihyperlipidemic – n/a <sup>56</sup><br>Cytotoxic – a <sup>56</sup>                                              | Fungi /<br><i>Ascomycota</i>   | C <sub>10</sub> H <sub>16</sub> O <sub>5</sub> | 216 |
| <b>97</b>  | Dictyosphaeric acid A | <i>Penicillium</i> sp. F01V25 <sup>57</sup>                                          | Antibacterial – a <sup>57</sup><br>Antifungal – a <sup>57</sup>                                                    | Fungi /<br><i>Ascomycota</i>   | C <sub>22</sub> H <sub>24</sub> O <sub>8</sub> | 416 |
| <b>98</b>  | Dictyosphaeric acid B | <i>Penicillium</i> sp. F01V25 <sup>57</sup>                                          | Antibacterial – n/a <sup>57</sup><br>Antifungal – n/a <sup>57</sup>                                                | Fungi /<br><i>Ascomycota</i>   | C <sub>22</sub> H <sub>26</sub> O <sub>9</sub> | 434 |
| <b>99</b>  | Didemnilactone A      | <i>Didemnum moseleyi</i> <sup>58, 59</sup>                                           | Enzyme inhibitory – a <sup>107</sup><br>Binding activity to leukotriene B <sub>4</sub> receptors – a <sup>58</sup> | Animalia /<br><i>Ascidacea</i> | C <sub>20</sub> H <sub>28</sub> O <sub>3</sub> | 316 |
| <b>100</b> | Didemnilactone B      | <i>Didemnum moseleyi</i> <sup>107</sup>                                              | Enzyme inhibitory – a <sup>107</sup>                                                                               | Animalia /<br><i>Ascidacea</i> | C <sub>20</sub> H <sub>28</sub> O <sub>3</sub> | 316 |
| <b>101</b> | Diplodialide A        | <i>Diplodia pinea</i> IF0 6472 <sup>60, 61</sup>                                     | Enzyme inhibitory – a <sup>60, 61</sup>                                                                            | Fungi /<br><i>Ascomycota</i>   | C <sub>10</sub> H <sub>14</sub> O <sub>3</sub> | 182 |
| <b>102</b> | Diplodialide B        | <i>Diplodia pinea</i> IF0 6472 <sup>61</sup><br><i>Cephalosporium aphidicola</i> IMI | Not tested                                                                                                         | Fungi /<br><i>Ascomycota</i>   | C <sub>10</sub> H <sub>16</sub> O <sub>3</sub> | 184 |

|     |                |                                                                                         |                                                                                                                                                                                                                                                                                                                                                                                                                                                                                        |                              |                                                |     |
|-----|----------------|-----------------------------------------------------------------------------------------|----------------------------------------------------------------------------------------------------------------------------------------------------------------------------------------------------------------------------------------------------------------------------------------------------------------------------------------------------------------------------------------------------------------------------------------------------------------------------------------|------------------------------|------------------------------------------------|-----|
|     |                | 68689 <sup>62</sup>                                                                     |                                                                                                                                                                                                                                                                                                                                                                                                                                                                                        |                              |                                                |     |
| 103 | Diplodialide C | <i>Diplodia pinea</i> IF0<br>6472 <sup>61</sup>                                         | Not tested                                                                                                                                                                                                                                                                                                                                                                                                                                                                             | Fungi /<br><i>Ascomycota</i> | C <sub>10</sub> H <sub>18</sub> O <sub>3</sub> | 186 |
| 104 | Diplodialide D | <i>Diplodia pinea</i> IF0<br>6472 <sup>61, 63</sup>                                     | Not tested                                                                                                                                                                                                                                                                                                                                                                                                                                                                             | Fungi /<br><i>Ascomycota</i> | C <sub>10</sub> H <sub>16</sub> O <sub>4</sub> | 200 |
| 105 | Fusanolide A   | <i>Fusarium</i> sp. <sup>64</sup>                                                       | Plant growth inhibition –<br>a <sup>64</sup>                                                                                                                                                                                                                                                                                                                                                                                                                                           | Fungi /<br><i>Ascomycota</i> | C <sub>10</sub> H <sub>14</sub> O <sub>2</sub> | 166 |
| 106 | Fusanolide B   | <i>Fusarium</i> sp. <sup>64</sup>                                                       | Plant growth inhibition –<br>n/a <sup>64</sup>                                                                                                                                                                                                                                                                                                                                                                                                                                         | Fungi /<br><i>Ascomycota</i> | C <sub>10</sub> H <sub>14</sub> O <sub>4</sub> | 198 |
| 107 | Glabramycin A  | <i>Neosartorya glabra</i><br>MF7030<br>and F-155,700 <sup>65</sup>                      | Antibacterial – a <sup>65</sup><br>Antifungal – a <sup>65</sup><br>Inhibition of RNA<br>synthesis – a <sup>65</sup>                                                                                                                                                                                                                                                                                                                                                                    | Fungi /<br><i>Ascomycota</i> | C <sub>22</sub> H <sub>24</sub> O <sub>6</sub> | 384 |
| 108 | Glabramycin B  | <i>Neosartorya glabra</i><br>MF7030<br>and F-155,700 <sup>65</sup>                      | Antibacterial – a <sup>65</sup><br>Antifungal – a <sup>65</sup>                                                                                                                                                                                                                                                                                                                                                                                                                        | Fungi /<br><i>Ascomycota</i> | C <sub>22</sub> H <sub>26</sub> O <sub>6</sub> | 386 |
| 109 | Glabramycin C  | <i>Neosartorya glabra</i><br>MF7030<br>and F-155,700 <sup>65</sup>                      | Antibacterial – a <sup>65</sup><br>Antifungal – a <sup>65</sup>                                                                                                                                                                                                                                                                                                                                                                                                                        | Fungi /<br><i>Ascomycota</i> | C <sub>22</sub> H <sub>24</sub> O <sub>6</sub> | 384 |
| 110 | Herbarumin I   | <i>Phoma herbarum</i> <sup>66</sup><br><i>Stagonospora cirsii</i><br>S-47 <sup>67</sup> | Antialgal – n/a <sup>68</sup><br>Antibacterial – n/a <sup>67, 68</sup><br>Antifungal – n/a <sup>67</sup><br>Binding activity to bovine<br>brain-calmodulin – a <sup>69</sup><br>Cytotoxic – a <sup>67</sup> / n/a <sup>70</sup><br>Enzyme inhibitory – a <sup>69</sup><br>Herbicidal activity – a <sup>70</sup><br>Insecticidal – a <sup>67</sup><br>Mycotoxic/Zootoxic –<br>n/a <sup>67</sup><br>Plant growth inhibition –<br>a <sup>66, 68</sup><br>Phytotoxic – a <sup>67, 68</sup> | Fungi /<br><i>Ascomycota</i> | C <sub>12</sub> H <sub>20</sub> O <sub>4</sub> | 228 |
| 111 | Herbarumin II  | <i>Phoma herbarum</i> <sup>66</sup><br><i>Didymella pinodes</i>                         | Binding activity to bovine<br>brain-calmodulin – a <sup>69</sup>                                                                                                                                                                                                                                                                                                                                                                                                                       | Fungi /<br><i>Ascomycota</i> | C <sub>12</sub> H <sub>20</sub> O <sub>5</sub> | 244 |

|     |                  |                                                                                       |                                                                                                                                                                                                                              |                              |                                                 |     |
|-----|------------------|---------------------------------------------------------------------------------------|------------------------------------------------------------------------------------------------------------------------------------------------------------------------------------------------------------------------------|------------------------------|-------------------------------------------------|-----|
|     |                  | CO-99 <sup>10</sup><br><i>Paraphaeosphaeria recurvifoliae</i> EML-PL001 <sup>13</sup> | Plant growth inhibition – a <sup>66</sup><br>Phytotoxic – n/a <sup>10</sup><br>Enzyme inhibitory – a <sup>13</sup>                                                                                                           |                              |                                                 |     |
| 112 | Herbarumin III   | <i>Phoma herbarum</i> <sup>69</sup>                                                   | Binding activity to bovine brain-calmodulin – a <sup>69</sup><br>Plant growth inhibition – a <sup>69</sup>                                                                                                                   | Fungi /<br><i>Ascomycota</i> | C <sub>12</sub> H <sub>20</sub> O <sub>3</sub>  | 212 |
| 113 | Hispidulactone A | <i>Chaetosphaeronema hispidulum</i> TS-8-1 <sup>7</sup>                               | Cytotoxic – n/a <sup>7</sup>                                                                                                                                                                                                 | Fungi /<br><i>Ascomycota</i> | C <sub>15</sub> H <sub>20</sub> O <sub>4</sub>  | 264 |
| 114 | Hispidulactone B | <i>Chaetosphaeronema hispidulum</i> TS-8-1 <sup>7, 16</sup>                           | Not tested                                                                                                                                                                                                                   | Fungi /<br><i>Ascomycota</i> | C <sub>14</sub> H <sub>18</sub> O <sub>5</sub>  | 266 |
| 115 | Hispidulactone C | <i>Chaetosphaeronema hispidulum</i> TS-8-1 <sup>7</sup>                               | Not tested                                                                                                                                                                                                                   | Fungi /<br><i>Ascomycota</i> | C <sub>15</sub> H <sub>20</sub> O <sub>5</sub>  | 280 |
| 116 | Hispidulactone F | <i>Chaetosphaeronema hispidulum</i> TS-8-1 <sup>16</sup>                              | Cytotoxic – a <sup>16</sup>                                                                                                                                                                                                  | Fungi /<br><i>Ascomycota</i> | C <sub>15</sub> H <sub>20</sub> O <sub>5</sub>  | 280 |
| 117 | Humicolactone    | <i>Gilmaniella humicola</i> CBS 220.65 <sup>71</sup>                                  | Antibacterial – a <sup>71</sup><br>Antifungal – a <sup>71</sup><br>Cytotoxic – a <sup>71</sup><br>Nematicidal – n/a <sup>71</sup><br>Plant growth inhibition – a <sup>71</sup><br>Plant growth promotion – n/a <sup>71</sup> | Fungi /<br><i>Ascomycota</i> | C <sub>10</sub> H <sub>12</sub> O <sub>5</sub>  | 212 |
| 118 | Hypocreolide A   | <i>Hypocrea lactea</i> IBWF 02002 <sup>72</sup>                                       | Antibacterial – a <sup>72</sup><br>Antifungal – a <sup>72</sup><br>Cytotoxic – a <sup>72</sup><br>Plant growth inhibition – n/a <sup>72</sup><br>Phytotoxic – a <sup>72</sup>                                                | Fungi /<br><i>Ascomycota</i> | C <sub>16</sub> H <sub>28</sub> O <sub>3</sub>  | 268 |
| 119 | Hypoxylyde       | <i>Annulohypoxyylon</i> sp. <sup>73</sup>                                             | Not tested                                                                                                                                                                                                                   | Fungi /<br><i>Ascomycota</i> | C <sub>20</sub> H <sub>22</sub> O <sub>8</sub>  | 390 |
| 120 | Lithocarpin A    | <i>Phomopsis lithocarpus</i> FS508 <sup>74</sup>                                      | Cytotoxic – a <sup>74</sup>                                                                                                                                                                                                  | Fungi /<br><i>Ascomycota</i> | C <sub>37</sub> H <sub>42</sub> O <sub>11</sub> | 662 |

|     |                   |                                                                                                                                                                                                                                                                                                                                     |                                                                                                                                                                                                                                                                                                                                                                       |                              |                                                 |     |                                                                                                                         |
|-----|-------------------|-------------------------------------------------------------------------------------------------------------------------------------------------------------------------------------------------------------------------------------------------------------------------------------------------------------------------------------|-----------------------------------------------------------------------------------------------------------------------------------------------------------------------------------------------------------------------------------------------------------------------------------------------------------------------------------------------------------------------|------------------------------|-------------------------------------------------|-----|-------------------------------------------------------------------------------------------------------------------------|
| 121 | Lithocarpin B     | <i>Phomopsis lithocarpus</i> FS508 <sup>74</sup>                                                                                                                                                                                                                                                                                    | Cytotoxic – a <sup>74</sup>                                                                                                                                                                                                                                                                                                                                           | Fungi /<br><i>Ascomycota</i> | C <sub>35</sub> H <sub>40</sub> O <sub>10</sub> | 620 |                                                                                                                         |
| 122 | Lithocarpin C     | <i>Phomopsis lithocarpus</i> FS508 <sup>74</sup>                                                                                                                                                                                                                                                                                    | Cytotoxic – a <sup>74</sup>                                                                                                                                                                                                                                                                                                                                           | Fungi /<br><i>Ascomycota</i> | C <sub>35</sub> H <sub>42</sub> O <sub>9</sub>  | 606 |                                                                                                                         |
| 123 | Lithocarpin D     | <i>Phomopsis lithocarpus</i> FS508 <sup>74</sup>                                                                                                                                                                                                                                                                                    | Cytotoxic – a <sup>74</sup>                                                                                                                                                                                                                                                                                                                                           | Fungi /<br><i>Ascomycota</i> | C <sub>37</sub> H <sub>42</sub> O <sub>11</sub> | 662 |                                                                                                                         |
| 124 | Luteolide         | <i>Gephyromantis luteus</i> <sup>75</sup><br><i>Mantidactylus betsileanus</i> <sup>75</sup><br><i>Gephyromantis moseri</i> <sup>75, 76</sup>                                                                                                                                                                                        | Not tested                                                                                                                                                                                                                                                                                                                                                            | Animalia /<br>Amphibia       | C <sub>13</sub> H <sub>24</sub> O <sub>2</sub>  | 212 | The compound C in <i>G. moseri</i> <sup>76</sup> was later identified as luteolide in Melnik et al., 2019 <sup>75</sup> |
| 125 | Mangiferaelactone | <i>Pestalotiopsis mangiferae</i> <sup>77</sup>                                                                                                                                                                                                                                                                                      | Antibacterial – a <sup>77</sup><br>Antiparasitic – n/a <sup>77</sup><br>Cytotoxic – n/a <sup>77</sup>                                                                                                                                                                                                                                                                 | Fungi /<br><i>Ascomycota</i> | C <sub>20</sub> H <sub>32</sub> O <sub>8</sub>  | 400 |                                                                                                                         |
| 126 | Mantidactolide A  | <i>Mantidactylus femoralis</i> <sup>78</sup>                                                                                                                                                                                                                                                                                        | Not tested                                                                                                                                                                                                                                                                                                                                                            | Animalia /<br>Amphibia       | C <sub>11</sub> H <sub>20</sub> O <sub>2</sub>  | 184 |                                                                                                                         |
| 127 | Mantidactolide B  | <i>Mantidactylus femoralis</i> <sup>78</sup>                                                                                                                                                                                                                                                                                        | Not tested                                                                                                                                                                                                                                                                                                                                                            | Animalia /<br>Amphibia       | C <sub>11</sub> H <sub>20</sub> O <sub>2</sub>  | 184 |                                                                                                                         |
| 128 | Microcarpalide    | Unidentified fungus <sup>79</sup>                                                                                                                                                                                                                                                                                                   | Antimicrofilament – a <sup>79</sup><br>Cytotoxic – a <sup>79</sup>                                                                                                                                                                                                                                                                                                    | Fungi                        | C <sub>16</sub> H <sub>28</sub> O <sub>5</sub>  | 300 |                                                                                                                         |
| 129 | Modiolide A       | <i>Curvularia</i> sp. PSU-F22 <sup>45</sup><br><i>Curvularia</i> sp. M12 <sup>80</sup><br><i>Paraphaeosphaeria</i> sp. N119 <sup>81</sup><br><i>Stagonospora cirsii</i> C-163 <sup>46</sup><br><i>Microsphaeropsis arundinis</i> <sup>82</sup><br><i>Paraconiothyrium</i> sp. VK-13 <sup>83, 84</sup><br><i>Periconia siamensis</i> | Antibacterial – a <sup>81, 85</sup><br>Antifungal – a <sup>81</sup> , n/a <sup>45</sup><br>Anti-inflammatory – n/a <sup>83</sup><br>Antioxidant capacity – n/a <sup>2</sup><br>Cytotoxic – a <sup>82</sup><br>Motility inhibitory – a <sup>80</sup><br>Phytotoxic – a <sup>80</sup><br>Plant growth inhibition – n/a <sup>46</sup><br>Zoosporicidal – a <sup>80</sup> | Fungi /<br><i>Ascomycota</i> | C <sub>10</sub> H <sub>14</sub> O <sub>4</sub>  | 198 |                                                                                                                         |

|     |                              |                                                                                                                                                       |                                                                                                                                                                                                                                                         |                                   |                                                |                                                                                                                                                          |
|-----|------------------------------|-------------------------------------------------------------------------------------------------------------------------------------------------------|---------------------------------------------------------------------------------------------------------------------------------------------------------------------------------------------------------------------------------------------------------|-----------------------------------|------------------------------------------------|----------------------------------------------------------------------------------------------------------------------------------------------------------|
|     |                              | CMUGE015 <sup>85, 86</sup><br><i>Roussoella siamensis</i><br>SYSU-MS4723 <sup>2</sup>                                                                 |                                                                                                                                                                                                                                                         |                                   |                                                |                                                                                                                                                          |
| 130 | Modiolide B                  | <i>Curvularia</i> sp. PSU-F22 <sup>45</sup><br><i>Paraphaeosphaeria</i> sp. N119 <sup>81</sup><br><i>Paraconiothyrium</i> sp. VK-13 <sup>83, 84</sup> | Antibacterial – n/a <sup>45, 81</sup><br>Antifungal – a <sup>81</sup> , n/a <sup>45</sup><br>Anti-inflammatory – n/a <sup>83</sup>                                                                                                                      | Fungi /<br><i>Ascomycota</i>      | C <sub>10</sub> H <sub>14</sub> O <sub>3</sub> | 182                                                                                                                                                      |
| 131 | Modiolide D                  | <i>Microsphaeropsis arundinis</i> <sup>82</sup><br><i>Paraconiothyrium</i> sp. VK-13 <sup>83</sup>                                                    | Anti-inflammatory – n/a <sup>83</sup><br>Cytotoxic – a <sup>82</sup>                                                                                                                                                                                    | Fungi /<br><i>Ascomycota</i>      | C <sub>12</sub> H <sub>16</sub> O <sub>5</sub> | 240                                                                                                                                                      |
| 132 | Modiolide E                  | <i>Microsphaeropsis arundinis</i> <sup>82</sup><br><i>Paraconiothyrium</i> sp. VK-13 <sup>83</sup>                                                    | Anti-inflammatory – n/a <sup>83</sup><br>Cytotoxic – a <sup>82</sup>                                                                                                                                                                                    | Fungi /<br><i>Ascomycota</i>      | C <sub>12</sub> H <sub>16</sub> O <sub>5</sub> | 240                                                                                                                                                      |
| 133 | Modiolide F                  | <i>Paraconiothyrium</i> sp. VK-13 <sup>83</sup>                                                                                                       | Anti-inflammatory – n/a <sup>83</sup>                                                                                                                                                                                                                   | Fungi /<br><i>Ascomycota</i>      | C <sub>12</sub> H <sub>16</sub> O <sub>5</sub> | 240                                                                                                                                                      |
| 134 | Modiolide G                  | <i>Paraconiothyrium</i> sp. VK-13 <sup>83</sup>                                                                                                       | Anti-inflammatory – n/a <sup>83</sup>                                                                                                                                                                                                                   | Fungi /<br><i>Ascomycota</i>      | C <sub>10</sub> H <sub>14</sub> O <sub>4</sub> | 198                                                                                                                                                      |
| 135 | Mueggelone =<br>Gloeolactone | <i>Aphanizomenon flos-aquae</i> <sup>87</sup><br><i>Gloeotrichia</i> sp. <sup>88</sup>                                                                | Antialgal – n/a <sup>87</sup><br>Antibacterial – n/a <sup>87, 88</sup><br>Anti-fish embryo larval development test – a <sup>87</sup><br>Antifungal – n/a <sup>87</sup><br>Enzyme inhibitory – n/a <sup>87</sup><br>Mycotoxic/Zootoxic – a <sup>88</sup> | Bacteria /<br><i>Cyanophyceae</i> | C <sub>18</sub> H <sub>28</sub> O <sub>3</sub> | 292<br>Two natural products have the same structures. Their identity was noted by Tidgewel et al., 2010 <sup>89</sup> and Sun et al., 2012 <sup>90</sup> |
| 136 | Multiplolide A               | <i>Xylaria multiplex</i> BCC 1111 <sup>91</sup><br><i>Phomopsis</i> sp. YM 311483 <sup>19</sup>                                                       | Antifungal – a <sup>19, 91</sup> , n/a <sup>14</sup><br>Antiparasitic – n/a <sup>91</sup><br>Cytotoxic – n/a <sup>14</sup><br>Enzyme inhibitory – n/a <sup>91</sup>                                                                                     | Fungi /<br><i>Ascomycota</i>      | C <sub>10</sub> H <sub>14</sub> O <sub>5</sub> | 214                                                                                                                                                      |

|     |                                      |                                                                                                       |                                                                                                                                                       |                                    |                                                  |     |
|-----|--------------------------------------|-------------------------------------------------------------------------------------------------------|-------------------------------------------------------------------------------------------------------------------------------------------------------|------------------------------------|--------------------------------------------------|-----|
|     |                                      | <i>Phomopsis</i> sp. NXZ-05 <sup>14</sup>                                                             |                                                                                                                                                       |                                    |                                                  |     |
| 137 | Multiplolide B                       | <i>Xylaria multiplex</i><br>BCC 1111 <sup>91</sup>                                                    | Antifungal – a <sup>91</sup><br>Antiparasitic – n/a <sup>91</sup><br>Enzyme inhibitory – n/a <sup>91</sup>                                            | Fungi /<br><i>Ascomycota</i>       | C <sub>14</sub> H <sub>18</sub> O <sub>6</sub>   | 282 |
| 138 | Nargenicin A1<br>(CP-47,444, CS-682) | <i>Nocardia argentinensis</i> ATCC 31306 <sup>92, 93</sup><br><i>Nocardia</i> sp. CS682 <sup>94</sup> | Antibacterial – a <sup>92, 94</sup><br>Anti-oxidation – a <sup>94</sup><br>Cytotoxic – n/a <sup>94</sup>                                              | Bacteria /<br><i>Actinomycetia</i> | C <sub>28</sub> H <sub>37</sub> NO <sub>8</sub>  | 515 |
| 139 | Nargenicin B1<br>(CP 51467)          | <i>Nocardia argentinensis</i> ATCC 31438 <sup>95</sup>                                                | Antibacterial – a <sup>95</sup>                                                                                                                       | Bacteria /<br><i>Actinomycetia</i> | C <sub>29</sub> H <sub>39</sub> NO <sub>10</sub> | 561 |
| 140 | Nargenicin B2                        | <i>Nocardia</i> sp. <sup>96</sup>                                                                     | Antibacterial – a <sup>96</sup>                                                                                                                       | Bacteria /<br><i>Actinomycetia</i> | C <sub>28</sub> H <sub>37</sub> NO <sub>9</sub>  | 531 |
| 141 | Nargenicin B3                        | <i>Nocardia</i> sp. <sup>96</sup>                                                                     | Antibacterial – a <sup>96</sup>                                                                                                                       | Bacteria /<br><i>Actinomycetia</i> | C <sub>28</sub> H <sub>37</sub> NO <sub>9</sub>  | 531 |
| 142 | Nargenicin C1<br>(CP-57820)          | <i>Nocardia</i> sp. N467-32 <sup>96, 97</sup>                                                         | Antibacterial – a <sup>96, 97</sup>                                                                                                                   | Bacteria /<br><i>Actinomycetia</i> | C <sub>30</sub> H <sub>41</sub> NO <sub>10</sub> | 575 |
| 143 | Neo-debromoaplysiatoxin C            | <i>Lyngbya</i> sp. <sup>98</sup>                                                                      | Cytotoxic – n/a <sup>98</sup>                                                                                                                         | Bacteria /<br>Cyanophyceae         | C <sub>32</sub> H <sub>44</sub> O <sub>9</sub>   | 572 |
| 144 | Neodidemnilactone                    | <i>Didemnum moseleyi</i> <sup>58, 59</sup>                                                            | Binding activity to leukotriene B <sub>4</sub> receptors – a <sup>59</sup>                                                                            | Animalia /<br><i>Ascidacea</i>     | C <sub>20</sub> H <sub>30</sub> O <sub>3</sub>   | 318 |
| 145 | Nodusmicin                           | <i>Saccharopolyspora hirsuta</i> 367 (UC® 8106, NRRL 10245) <sup>99</sup>                             | Antibacterial – a <sup>99</sup>                                                                                                                       | Bacteria /<br><i>Actinomycetia</i> | C <sub>23</sub> H <sub>34</sub> O <sub>7</sub>   | 422 |
| 146 | Penicillinolide A                    | <i>Penicillium</i> sp. SF-5292 <sup>100, 101</sup>                                                    | Anti-inflammatory – a <sup>100, 101</sup>                                                                                                             | Fungi /<br><i>Ascomycota</i>       | C <sub>14</sub> H <sub>24</sub> O <sub>5</sub>   | 272 |
| 147 | Phomol                               | <i>Phomopsis</i> sp. E02018 <sup>102</sup>                                                            | Antibacterial – a <sup>102</sup><br>Antifungal – a <sup>102</sup><br>Anti-inflammatory – a <sup>102</sup><br>Reporter gene assay – n/a <sup>102</sup> | Fungi /<br><i>Ascomycota</i>       | C <sub>22</sub> H <sub>36</sub> O <sub>7</sub>   | 412 |

|     |                   | Plant growth inhibition – a <sup>102</sup>                                                                                                                            |                                                                                                                                                 |                                                               |                                                    |
|-----|-------------------|-----------------------------------------------------------------------------------------------------------------------------------------------------------------------|-------------------------------------------------------------------------------------------------------------------------------------------------|---------------------------------------------------------------|----------------------------------------------------|
| 148 | Phomolide A       | <i>Phomopsis</i> sp.<br>hzla01-1 <sup>103</sup>                                                                                                                       | Antibacterial – a <sup>103</sup><br>Antifungal – a <sup>103</sup><br>Cytotoxic – n/a <sup>103</sup>                                             | Fungi /<br><i>Ascomycota</i>                                  | C <sub>12</sub> H <sub>16</sub> O <sub>3</sub> 208 |
| 149 | Phomolide B       | <i>Phomopsis</i> sp.<br>hzla01-1 <sup>103</sup>                                                                                                                       | Antibacterial – a <sup>103</sup><br>Antifungal – a <sup>103</sup><br>Cytotoxic – n/a <sup>103</sup>                                             | Fungi /<br><i>Ascomycota</i>                                  | C <sub>12</sub> H <sub>18</sub> O <sub>4</sub> 226 |
| 150 | Phomolide C       | <i>Phomopsis</i> sp.<br>B27 <sup>104</sup><br><i>Diaporthe</i> sp. <sup>105</sup>                                                                                     | Antibacterial – n/a <sup>104</sup><br>Antifungal – n/a <sup>105</sup><br>Antiproliferative – a <sup>105</sup><br>Cytotoxic – n/a <sup>104</sup> | Fungi /<br><i>Ascomycota</i>                                  | C <sub>18</sub> H <sub>30</sub> O <sub>6</sub> 342 |
| 151 | Phomolide D       | <i>Phomopsis</i> sp.<br>A123 <sup>106</sup>                                                                                                                           | Antibacterial – n/a <sup>106</sup><br>Antifungal – n/a <sup>106</sup>                                                                           | Fungi /<br><i>Ascomycota</i>                                  | C <sub>12</sub> H <sub>20</sub> O <sub>5</sub> 244 |
| 152 | Phomolide E       | <i>Phomopsis</i> sp.<br>A123 <sup>106</sup>                                                                                                                           | Antibacterial – n/a <sup>106</sup><br>Antifungal – n/a <sup>106</sup>                                                                           | Fungi /<br><i>Ascomycota</i>                                  | C <sub>12</sub> H <sub>18</sub> O <sub>5</sub> 242 |
| 153 | Phomolide F       | <i>Phomopsis</i> sp.<br>A123 <sup>106</sup>                                                                                                                           | Antibacterial – n/a <sup>106</sup><br>Antifungal – n/a <sup>106</sup>                                                                           | Fungi /<br><i>Ascomycota</i>                                  | C <sub>12</sub> H <sub>18</sub> O <sub>5</sub> 242 |
| 154 | Phomolide G       | <i>Phomopsis</i> sp.<br>A123 <sup>106</sup>                                                                                                                           | Antibacterial – n/a <sup>106</sup><br>Antifungal – n/a <sup>106</sup>                                                                           | Fungi /<br><i>Ascomycota</i>                                  | C <sub>12</sub> H <sub>20</sub> O <sub>5</sub> 244 |
| 155 | Phomolide H       | <i>Phomopsis</i> sp.<br>A124 <sup>106</sup>                                                                                                                           | Antibacterial – n/a <sup>106</sup><br>Antifungal – n/a <sup>106</sup>                                                                           | Fungi /<br><i>Ascomycota</i>                                  | C <sub>13</sub> H <sub>22</sub> O <sub>5</sub> 258 |
| 156 | Phoracantholide I | <i>Phoracantha</i><br><i>synonyma</i><br>( <i>Coleoptera</i> :<br><i>Cerambycidae</i> ) <sup>107</sup><br><i>Mantidactylus</i><br><i>femoralis</i> <sup>78</sup>      | Not tested                                                                                                                                      | Animalia /<br><i>Insecta</i><br>Animalia /<br><i>Amphibia</i> | C <sub>10</sub> H <sub>18</sub> O <sub>2</sub> 170 |
| 157 | Phoracantholide J | <i>Phoracantha</i><br><i>synonyma</i><br>( <i>Coleoptera</i> :<br><i>Cerambycidae</i> ) <sup>107</sup><br><i>Mantidactylus</i><br><i>multiplicatus</i> <sup>108</sup> | Not tested                                                                                                                                      | Animalia /<br><i>Insecta</i>                                  | C <sub>10</sub> H <sub>16</sub> O <sub>2</sub> 168 |
| 158 | Pinolide          | <i>Didymella pinodes</i><br>CO-99 <sup>10</sup>                                                                                                                       | Phytotoxic – n/a <sup>10</sup>                                                                                                                  | Fungi /<br><i>Ascomycota</i>                                  | C <sub>12</sub> H <sub>20</sub> O <sub>5</sub> 244 |

|            |                        |                                                                                                                                                        |                                                                                                                                                     |                                    |                                                |     |
|------------|------------------------|--------------------------------------------------------------------------------------------------------------------------------------------------------|-----------------------------------------------------------------------------------------------------------------------------------------------------|------------------------------------|------------------------------------------------|-----|
| <b>159</b> | Pinolidoxin            | <i>Ascochyta pinodes</i><br>ITEM 1094 <sup>109</sup><br><i>Didymella pinodes</i><br>CO-99 <sup>10</sup><br><i>Phoma bellidis</i><br>HGX2 <sup>11</sup> | Antifungal – n/a <sup>17</sup><br>Cytotoxic – n/a <sup>11</sup><br>Mycotoxic/Zootoxic – n/a <sup>17</sup><br>Phytotoxic – a <sup>10, 109</sup>      | Fungi /<br><i>Ascomycota</i>       | C <sub>18</sub> H <sub>26</sub> O <sub>6</sub> | 338 |
| <b>160</b> | Podospin A             | <i>Podospora</i> sp.<br>G214 <sup>110</sup>                                                                                                            | Apoptosis assay – a <sup>110</sup><br>Cytotoxic – a <sup>110</sup><br>Immunosuppressive – a <sup>110</sup>                                          | Fungi /<br><i>Ascomycota</i>       | C <sub>18</sub> H <sub>22</sub> O <sub>6</sub> | 334 |
| <b>161</b> | Podospin B             | <i>Podospora</i> sp.<br>G214 <sup>110</sup>                                                                                                            | Cytotoxic – a <sup>110</sup><br>Immunosuppressive – a <sup>110</sup>                                                                                | Fungi /<br><i>Ascomycota</i>       | C <sub>18</sub> H <sub>24</sub> O <sub>6</sub> | 336 |
| <b>162</b> | Podospin C             | <i>Podospora</i> sp.<br>G214 <sup>110</sup>                                                                                                            | Cytotoxic – a <sup>110</sup><br>Immunosuppressive – a <sup>110</sup>                                                                                | Fungi /<br><i>Ascomycota</i>       | C <sub>16</sub> H <sub>22</sub> O <sub>5</sub> | 294 |
| <b>163</b> | Presaccharothriolide X | <i>Saccharothrix</i> sp.<br>A1506 <sup>111</sup>                                                                                                       | Antifungal – a <sup>111</sup><br>Cytotoxic – a <sup>111</sup>                                                                                       | Bacteria /<br><i>Actinomycetia</i> | C <sub>19</sub> H <sub>24</sub> O <sub>6</sub> | 348 |
| <b>164</b> | Putaminoxin A          | <i>Phoma</i><br><i>putaminum</i> <sup>112, 113</sup>                                                                                                   | Antibacterial – n/a <sup>112</sup><br>Antifungal – a <sup>112</sup><br>Mycotoxic/Zootoxic – n/a <sup>112</sup><br>Phytotoxic – a <sup>112</sup>     | Fungi /<br><i>Ascomycota</i>       | C <sub>12</sub> H <sub>20</sub> O <sub>3</sub> | 212 |
| <b>165</b> | Putaminoxin B          | <i>Phoma</i><br><i>putaminum</i> <sup>113</sup>                                                                                                        | Antibacterial – n/a <sup>113</sup><br>Antifungal – n/a <sup>113</sup><br>Mycotoxic/Zootoxic – n/a <sup>113</sup><br>Phytotoxic – n/a <sup>113</sup> | Fungi /<br><i>Ascomycota</i>       | C <sub>14</sub> H <sub>24</sub> O <sub>3</sub> | 240 |
| <b>166</b> | Putaminoxin C          | <i>Phoma</i><br><i>putaminum</i> <sup>113</sup>                                                                                                        | Antibacterial – a <sup>113</sup><br>Antifungal – n/a <sup>113</sup><br>Mycotoxic/Zootoxic – n/a <sup>113</sup><br>Phytotoxic – a                    | Fungi /<br><i>Ascomycota</i>       | C <sub>12</sub> H <sub>18</sub> O <sub>3</sub> | 210 |
| <b>167</b> | Putaminoxin D          | <i>Phoma</i><br><i>putaminum</i> <sup>114</sup>                                                                                                        | Antifungal – n/a <sup>114</sup><br>Mycotoxic/Zootoxic – n/a <sup>114</sup><br>Phytotoxic – n/a <sup>114</sup>                                       | Fungi /<br><i>Ascomycota</i>       | C <sub>14</sub> H <sub>24</sub> O <sub>3</sub> | 240 |
| <b>168</b> | Putaminoxin E          | <i>Phoma</i><br><i>putaminum</i> <sup>114</sup>                                                                                                        | Antifungal – n/a <sup>114</sup><br>Mycotoxic/Zootoxic – n/a <sup>114</sup><br>Phytotoxic – n/a <sup>114</sup>                                       | Fungi /<br><i>Ascomycota</i>       | C <sub>12</sub> H <sub>22</sub> O <sub>3</sub> | 214 |
| <b>169</b> | Pyrenolide A           | <i>Pyrenophora teres</i><br>IFO 7508 <sup>115</sup>                                                                                                    | Motility inhibitory – a <sup>80</sup><br>Zoosporicidal – a <sup>80</sup>                                                                            | Fungi /<br><i>Ascomycota</i>       | C <sub>10</sub> H <sub>10</sub> O <sub>4</sub> | 194 |

|     |                      |                                                                                             |                                                                                                               |                                    |                                                  |     |
|-----|----------------------|---------------------------------------------------------------------------------------------|---------------------------------------------------------------------------------------------------------------|------------------------------------|--------------------------------------------------|-----|
|     |                      | <i>Curvularia</i> sp. PSU-F22 <sup>45</sup>                                                 |                                                                                                               |                                    |                                                  |     |
|     |                      | <i>Curvularia</i> sp. M12 <sup>80</sup>                                                     |                                                                                                               |                                    |                                                  |     |
| 170 | Pyrenolide B         | <i>Pyrenophora teres</i> IF0 7508 <sup>116</sup>                                            | Not tested                                                                                                    | Fungi /<br><i>Ascomycota</i>       | C <sub>10</sub> H <sub>12</sub> O <sub>3</sub>   | 180 |
| 171 | Pyrenolide C         | <i>Pyrenophora teres</i> IF0 7508 <sup>116</sup>                                            | Not tested                                                                                                    | Fungi /<br><i>Ascomycota</i>       | C <sub>10</sub> H <sub>12</sub> O <sub>4</sub>   | 196 |
| 172 | Pyridomacrolidin     | <i>Beauveria bassiana</i> EPF-5 <sup>117</sup>                                              | Antibacterial – n/a <sup>117</sup><br>Antifungal – n/a <sup>117</sup><br>Enzyme inhibitory – a <sup>117</sup> | Fungi /<br><i>Ascomycota</i>       | C <sub>31</sub> H <sub>35</sub> NO <sub>10</sub> | 581 |
| 173 | Saccharothriolide A  | <i>Saccharothrix</i> sp. A1506 <sup>118</sup>                                               | Antibacterial – n/a <sup>118</sup><br>Cytotoxic – n/a <sup>118</sup>                                          | Bacteria /<br><i>Actinomycetia</i> | C <sub>26</sub> H <sub>31</sub> NO <sub>8</sub>  | 485 |
| 174 | Saccharothriolide B  | <i>Saccharothrix</i> sp. A1506 <sup>118</sup>                                               | Antibacterial – a <sup>118</sup><br>Antifungal – a <sup>111</sup><br>Cytotoxic – a <sup>118</sup>             | Bacteria /<br><i>Actinomycetia</i> | C <sub>25</sub> H <sub>31</sub> NO <sub>7</sub>  | 457 |
| 175 | Saccharothriolide C1 | <i>Saccharothrix</i> sp. A1506 <sup>118</sup>                                               | Antibacterial – n/a <sup>118</sup><br>Cytotoxic – n/a <sup>118</sup>                                          | Bacteria /<br><i>Actinomycetia</i> | C <sub>19</sub> H <sub>26</sub> O <sub>7</sub>   | 366 |
| 176 | Saccharothriolide C2 | <i>Saccharothrix</i> sp. A1506 with<br><i>Tsukamurella pulmonis</i> TP-B0596 <sup>119</sup> | Cytotoxic – n/a <sup>119</sup>                                                                                | Bacteria /<br><i>Actinomycetia</i> | C <sub>19</sub> H <sub>26</sub> O <sub>7</sub>   | 366 |
| 177 | Saccharothriolide D  | <i>Saccharothrix</i> sp. A1506 <sup>120</sup>                                               | Cytotoxic – n/a <sup>120</sup>                                                                                | Bacteria /<br><i>Actinomycetia</i> | C <sub>26</sub> H <sub>31</sub> NO <sub>8</sub>  | 485 |
| 178 | Saccharothriolide E  | <i>Saccharothrix</i> sp. A1506 <sup>120</sup>                                               | Cytotoxic – a <sup>120</sup>                                                                                  | Bacteria /<br><i>Actinomycetia</i> | C <sub>25</sub> H <sub>31</sub> NO <sub>7</sub>  | 457 |
| 179 | Saccharothriolide F  | <i>Saccharothrix</i> sp. A1506 <sup>120</sup>                                               | Cytotoxic – a <sup>120</sup>                                                                                  | Bacteria /<br><i>Actinomycetia</i> | C <sub>25</sub> H <sub>29</sub> NO <sub>8</sub>  | 471 |
| 180 | Sch 642305           | <i>Penicillium verrucosum</i> ILF-16214 <sup>121</sup>                                      | Antibacterial – a <sup>121</sup><br>Enzyme inhibitory – a <sup>121</sup>                                      | Fungi /<br><i>Ascomycota</i>       | C <sub>14</sub> H <sub>20</sub> O <sub>4</sub>   | 252 |
| 181 | Seimatopolide A      | <i>Seimatosporium discosioides</i> KACC 42490 <sup>122</sup>                                | Reporter gene assay – a <sup>122</sup>                                                                        | Fungi /<br><i>Ascomycota</i>       | C <sub>18</sub> H <sub>32</sub> O <sub>5</sub>   | 328 |
| 182 | Seimatopolide B      | <i>Seimatosporium</i>                                                                       | Reporter gene assay – a <sup>122</sup>                                                                        | Fungi /                            | C <sub>18</sub> H <sub>32</sub> O <sub>4</sub>   | 312 |

|            |                         |                                                                                                        |                                                                                                                                                                                                                                                                                                                                                                    |                              |                                                |     |
|------------|-------------------------|--------------------------------------------------------------------------------------------------------|--------------------------------------------------------------------------------------------------------------------------------------------------------------------------------------------------------------------------------------------------------------------------------------------------------------------------------------------------------------------|------------------------------|------------------------------------------------|-----|
|            |                         | <i>discosoides</i> KACC<br>42490 <sup>122</sup>                                                        |                                                                                                                                                                                                                                                                                                                                                                    | <i>Ascomycota</i>            |                                                |     |
| <b>183</b> | Shikinefralide A        | <i>Stachybotryaceae</i><br>sp. FKI-9632 <sup>123</sup>                                                 | Antibacterial – n/a <sup>123</sup><br>Antifungal – n/a <sup>123</sup><br>Antiparasitic – a <sup>123</sup><br>Cytotoxic – a <sup>123</sup>                                                                                                                                                                                                                          | Fungi /<br><i>Ascomycota</i> | C <sub>22</sub> H <sub>28</sub> O <sub>7</sub> | 404 |
| <b>184</b> | Shikinefralide B        | <i>Stachybotryaceae</i><br>sp. FKI-9632 <sup>123</sup>                                                 | Antibacterial – n/a <sup>123</sup><br>Antifungal – n/a <sup>123</sup><br>Antiparasitic – a <sup>123</sup><br>Cytotoxic – a <sup>123</sup>                                                                                                                                                                                                                          | Fungi /<br><i>Ascomycota</i> | C <sub>22</sub> H <sub>28</sub> O <sub>7</sub> | 404 |
| <b>185</b> | Shikinefralide C        | <i>Stachybotryaceae</i><br>sp. FKI-9632 <sup>123</sup>                                                 | Antibacterial – n/a <sup>123</sup><br>Antifungal – n/a <sup>123</sup>                                                                                                                                                                                                                                                                                              | Fungi /<br><i>Ascomycota</i> | C <sub>22</sub> H <sub>28</sub> O <sub>8</sub> | 420 |
| <b>186</b> | Shikinefralide D        | <i>Stachybotryaceae</i><br>sp. FKI-9632 <sup>123</sup>                                                 | Antibacterial – n/a <sup>123</sup><br>Antifungal – n/a <sup>123</sup>                                                                                                                                                                                                                                                                                              | Fungi /<br><i>Ascomycota</i> | C <sub>22</sub> H <sub>28</sub> O <sub>8</sub> | 420 |
| <b>187</b> | Sporostatin<br>(M-5032) | <i>Sporormiella</i> sp.<br>M5032 (FERM P-<br>9506) <sup>124</sup>                                      | Acute toxicity – n/a <sup>124</sup><br>Antibacterial – n/a <sup>124</sup><br>Antifungal – n/a <sup>124</sup><br>Enzyme inhibitory – a <sup>124</sup>                                                                                                                                                                                                               | Fungi /<br><i>Ascomycota</i> | C <sub>14</sub> H <sub>14</sub> O <sub>5</sub> | 262 |
| <b>188</b> | Stagonolide A           | <i>Stagonospora cirsii</i><br>C-163 <sup>125</sup><br><i>Stagonospora cirsii</i><br>S-47 <sup>67</sup> | Antialgal – a <sup>68</sup><br>Antibacterial – a <sup>67, 68, 125</sup><br>Antifungal – a <sup>67, 125</sup><br>Cytotoxic – a <sup>67, 68</sup><br>Herbicidal activity – a <sup>70</sup><br>Insecticidal – a <sup>67</sup><br>Mycotoxic/Zootoxic – a <sup>67, 125</sup><br>Phytotoxic – a <sup>67, 68, 125</sup><br>Plant growth inhibition – a <sup>68, 125</sup> | Fungi /<br><i>Ascomycota</i> | C <sub>12</sub> H <sub>18</sub> O <sub>4</sub> | 226 |
| <b>189</b> | Stagonolide B           | <i>Stagonospora cirsii</i><br>C-163 <sup>126</sup>                                                     | Mycotoxic/Zootoxic – n/a <sup>126</sup><br>Phytotoxic – n/a <sup>126</sup>                                                                                                                                                                                                                                                                                         | Fungi /<br><i>Ascomycota</i> | C <sub>12</sub> H <sub>20</sub> O <sub>5</sub> | 244 |
| <b>190</b> | Stagonolide C           | <i>Stagonospora cirsii</i><br>C-163 <sup>126</sup>                                                     | Mycotoxic/Zootoxic – a <sup>126</sup><br>Phytotoxic – n/a <sup>126</sup>                                                                                                                                                                                                                                                                                           | Fungi /<br><i>Ascomycota</i> | C <sub>10</sub> H <sub>16</sub> O <sub>4</sub> | 200 |
| <b>191</b> | Stagonolide D           | <i>Stagonospora cirsii</i><br>C-163 <sup>126</sup>                                                     | Mycotoxic/Zootoxic – n/a <sup>126</sup><br>Phytotoxic – n/a <sup>126</sup>                                                                                                                                                                                                                                                                                         | Fungi /<br><i>Ascomycota</i> | C <sub>10</sub> H <sub>14</sub> O <sub>4</sub> | 198 |
| <b>192</b> | Stagonolide E           | <i>Stagonospora cirsii</i>                                                                             | Antibacterial – n/a <sup>45</sup>                                                                                                                                                                                                                                                                                                                                  | Fungi /                      | C <sub>10</sub> H <sub>14</sub> O <sub>3</sub> | 182 |

|            |                    |                                                                     |                                                                                                                                                                                                                                                                                                                                                     |                                 |                                                |     |
|------------|--------------------|---------------------------------------------------------------------|-----------------------------------------------------------------------------------------------------------------------------------------------------------------------------------------------------------------------------------------------------------------------------------------------------------------------------------------------------|---------------------------------|------------------------------------------------|-----|
|            |                    | C-163 <sup>126</sup><br><i>Curvularia</i> sp. PSU-F22 <sup>45</sup> | Antifungal – n/a <sup>45</sup><br>Mycotoxic/Zootoxic – n/a <sup>126</sup><br>Phytotoxic – a <sup>126</sup>                                                                                                                                                                                                                                          | <i>Ascomycota</i>               |                                                |     |
| <b>193</b> | Stagonolide F      | <i>Stagonospora cirsii</i><br>C-163 <sup>126</sup>                  | Mycotoxic/Zootoxic – n/a <sup>126</sup><br>Phytotoxic – a <sup>126</sup>                                                                                                                                                                                                                                                                            | Fungi /<br><i>Ascomycota</i>    | C <sub>10</sub> H <sub>16</sub> O <sub>3</sub> | 184 |
| <b>194</b> | Stagonolide I      | <i>Stagonospora cirsii</i><br>C-163 <sup>46</sup>                   | Phytotoxic – a <sup>46</sup>                                                                                                                                                                                                                                                                                                                        | Fungi /<br><i>Ascomycota</i>    | C <sub>10</sub> H <sub>14</sub> O <sub>4</sub> | 198 |
| <b>195</b> | Stagonolide J      | <i>Stagonospora cirsii</i><br>S-47 <sup>67</sup>                    | Antialgal – n/a <sup>68</sup><br>Antibacterial – n/a <sup>67, 68</sup><br>Antifungal – n/a <sup>67</sup><br>Cytotoxic – n/a <sup>67, 68</sup><br>Insecticidal – a <sup>67</sup><br>Mycotoxic/Zootoxic – n/a <sup>67</sup><br>Phytotoxic – a <sup>67, 68</sup><br>Plant growth inhibition – n/a <sup>68</sup>                                        | Fungi /<br><i>Ascomycota</i>    | C <sub>12</sub> H <sub>20</sub> O <sub>4</sub> | 228 |
| <b>196</b> | Stagonolide K      | <i>Stagonospora cirsii</i><br>S-47 <sup>67</sup>                    | Antialgal – n/a <sup>68</sup><br>Antibacterial – n/a <sup>67, 68</sup><br>Antifungal – n/a <sup>67</sup><br>Cytotoxic – n/a <sup>67, 68</sup><br>Herbicidal activity – a <sup>70</sup><br>Insecticidal – a <sup>67</sup><br>Mycotoxic/Zootoxic – n/a <sup>67</sup><br>Phytotoxic – a <sup>67, 68</sup><br>Plant growth inhibition – a <sup>68</sup> | Fungi /<br><i>Ascomycota</i>    | C <sub>12</sub> H <sub>20</sub> O <sub>3</sub> | 212 |
| <b>197</b> | Stomopneulactone A | <i>Stomopneustes variolaris</i> <sup>127</sup>                      | Anti-inflammatory – a <sup>127</sup><br>Antioxidant – a <sup>127</sup>                                                                                                                                                                                                                                                                              | Animalia /<br><i>Echinoidea</i> | C <sub>16</sub> H <sub>26</sub> O <sub>5</sub> | 298 |
| <b>198</b> | Stomopneulactone B | <i>Stomopneustes variolaris</i> <sup>127</sup>                      | Anti-inflammatory – a <sup>127</sup><br>Antioxidant – a <sup>127</sup>                                                                                                                                                                                                                                                                              | Animalia /<br><i>Echinoidea</i> | C <sub>16</sub> H <sub>26</sub> O <sub>4</sub> | 282 |
| <b>199</b> | Sumalactone A      | <i>Penicillium sumatrense</i> MCCC 3A00612 <sup>128</sup>           | Anti-inflammatory – n/a <sup>128</sup>                                                                                                                                                                                                                                                                                                              | Fungi /<br><i>Ascomycota</i>    | C <sub>16</sub> H <sub>20</sub> O <sub>6</sub> | 308 |
| <b>200</b> | Sumalactone B      | <i>Penicillium sumatrense</i> MCCC 3A00612 <sup>128</sup>           | Anti-inflammatory – n/a <sup>128</sup>                                                                                                                                                                                                                                                                                                              | Fungi /<br><i>Ascomycota</i>    | C <sub>16</sub> H <sub>20</sub> O <sub>6</sub> | 308 |

|            |                                  |                                                                                                                                                                                                    |                                                                                                                                                                                                                                                                           |                              |                                                 |     |
|------------|----------------------------------|----------------------------------------------------------------------------------------------------------------------------------------------------------------------------------------------------|---------------------------------------------------------------------------------------------------------------------------------------------------------------------------------------------------------------------------------------------------------------------------|------------------------------|-------------------------------------------------|-----|
| <b>201</b> | Thiobiscephalosporolide A        | <i>Cephalosporium aphidicola</i> ACC 3490 <sup>129</sup>                                                                                                                                           | Not tested                                                                                                                                                                                                                                                                | Fungi /<br><i>Ascomycota</i> | C <sub>20</sub> H <sub>30</sub> SO <sub>8</sub> | 430 |
| <b>202</b> | Truncatenolide                   | <i>Colletotrichum truncatum</i> 17-5-5 <sup>130</sup>                                                                                                                                              | Antifungal – a <sup>130</sup>                                                                                                                                                                                                                                             | Fungi /<br><i>Ascomycota</i> | C <sub>10</sub> H <sub>16</sub> O <sub>3</sub>  | 184 |
| <b>203</b> | Tuckolide =<br>Decarestrictine D | <i>Polyporus tuberaster</i> <sup>131</sup><br><i>Penicillium simplicissimum</i> FH-A 6090 <sup>49, 50</sup><br><i>Botryotrichum</i> sp. NRRL 38180 ( <i>Chaetomium piluliferum</i> ) <sup>30</sup> | Antibacterial – n/a <sup>49</sup><br>Antifeedant – n/a <sup>131</sup><br>Antifungal – n/a <sup>49</sup><br>Antiprotozoal – n/a <sup>49</sup><br>Antiviral – n/a <sup>49</sup><br>Cholesterol biosynthesis inhibition – a <sup>49</sup><br>Hypolipidemic – a <sup>49</sup> | Fungi /<br><i>Ascomycota</i> | C <sub>10</sub> H <sub>16</sub> O <sub>5</sub>  | 216 |
| <b>204</b> | Xestodecalactone A               | <i>Penicillium cf. montanense</i> <sup>132</sup>                                                                                                                                                   | Antibacterial – n/a <sup>132</sup><br>Antifungal – n/a <sup>132</sup>                                                                                                                                                                                                     | Fungi /<br><i>Ascomycota</i> | C <sub>14</sub> H <sub>16</sub> O <sub>5</sub>  | 264 |
| <b>205</b> | Xestodecalactone B               | <i>Penicillium cf. montanense</i> <sup>132</sup>                                                                                                                                                   | Antibacterial – n/a <sup>132</sup><br>Antifungal – a <sup>132</sup>                                                                                                                                                                                                       | Fungi /<br><i>Ascomycota</i> | C <sub>14</sub> H <sub>16</sub> O <sub>6</sub>  | 280 |
| <b>206</b> | Xestodecalactone C               | <i>Penicillium cf. montanense</i> <sup>132</sup>                                                                                                                                                   | Antibacterial – n/a <sup>132</sup><br>Antifungal – n/a <sup>132</sup>                                                                                                                                                                                                     | Fungi /<br><i>Ascomycota</i> | C <sub>14</sub> H <sub>16</sub> O <sub>6</sub>  | 280 |
| <b>207</b> | Xestodecalactone D               | <i>Corynespora cassiicola</i> <sup>133</sup>                                                                                                                                                       | Antibacterial – n/a <sup>133</sup><br>Antifungal – n/a <sup>133</sup><br>Cytotoxic – n/a <sup>133</sup>                                                                                                                                                                   | Fungi /<br><i>Ascomycota</i> | C <sub>15</sub> H <sub>18</sub> O <sub>7</sub>  | 310 |
| <b>208</b> | Xestodecalactone E               | <i>Corynespora cassiicola</i> <sup>133</sup>                                                                                                                                                       | Antibacterial – n/a <sup>133</sup><br>Antifungal – n/a <sup>133</sup><br>Cytotoxic – n/a <sup>133</sup>                                                                                                                                                                   | Fungi /<br><i>Ascomycota</i> | C <sub>19</sub> H <sub>26</sub> O <sub>7</sub>  | 366 |
| <b>209</b> | Xestodecalactone F               | <i>Corynespora cassiicola</i> <sup>133</sup>                                                                                                                                                       | Antibacterial – n/a <sup>133</sup><br>Antifungal – n/a <sup>133</sup><br>Cytotoxic – n/a <sup>133</sup>                                                                                                                                                                   | Fungi /<br><i>Ascomycota</i> | C <sub>19</sub> H <sub>26</sub> O <sub>6</sub>  | 350 |
| <b>210</b> | Xylarolide                       | <i>Xylaria</i> sp. 101 <sup>134</sup>                                                                                                                                                              | Antibacterial – n/a <sup>134, 135</sup><br>Antifungal – a <sup>134</sup><br>Cytotoxic – a <sup>135</sup><br>Radical scavenging – n/a <sup>135</sup>                                                                                                                       | Fungi /<br><i>Ascomycota</i> | C <sub>12</sub> H <sub>18</sub> O <sub>4</sub>  | 226 |
| <b>211</b> | Xylarolide A                     | <i>Diaporthe</i> sp. LG23 <sup>135</sup>                                                                                                                                                           | Antibacterial – n/a <sup>135</sup><br>Cytotoxic – a <sup>135</sup>                                                                                                                                                                                                        | Fungi /<br><i>Ascomycota</i> | C <sub>22</sub> H <sub>28</sub> O <sub>7</sub>  | 404 |

|            |                                                                |                                                      |                                                                                                               |                              |                                                |     |
|------------|----------------------------------------------------------------|------------------------------------------------------|---------------------------------------------------------------------------------------------------------------|------------------------------|------------------------------------------------|-----|
|            |                                                                |                                                      | Radical scavenging – a <sup>135</sup>                                                                         |                              |                                                |     |
| <b>212</b> | Xylarolide B                                                   | <i>Diaporthe</i> sp.<br>LG23 <sup>135</sup>          | Antibacterial – n/a <sup>135</sup><br>Cytotoxic – a <sup>135</sup><br>Radical scavenging – n/a <sup>135</sup> | Fungi /<br><i>Ascomycota</i> | C <sub>13</sub> H <sub>20</sub> O <sub>4</sub> | 240 |
| <b>213</b> | Xyolide                                                        | <i>Xylaria feejeensis</i><br>MG871188 <sup>136</sup> | Antifungal – a <sup>136</sup>                                                                                 | Fungi /<br><i>Ascomycota</i> | C <sub>20</sub> H <sub>32</sub> O <sub>8</sub> | 400 |
| <b>214</b> | Z-4,6,9-trihydroxy-10-nonyl-3,4,5,6,9,10-hexahydrooxecin-2-one | <i>Tubercularia</i> sp.<br>TF5 <sup>137</sup>        | Antibacterial – n/a <sup>137</sup><br>Antifungal – n/a <sup>137</sup><br>Cytotoxic – a <sup>137</sup>         | Fungi /<br><i>Ascomycota</i> | C <sub>18</sub> H <sub>32</sub> O <sub>5</sub> | 328 |

**a** – active;

**n/a** – not active

\* – IC<sub>50</sub>, MIC and other experimental details related to the biological activity of TMLs can be found in the extended version of Table S1 in .xlsx format. This file is available upon request to the corresponding author.

## References:

1. H. Greve, P. J. Schupp, E. Eguereva, S. Kehraus and G. M. König, *J Nat Prod*, 2008, **71**, 1651-1653.
2. S. Chen, H. Shen, Y. Deng, H. Guo, M. Jiang, Z. Wu, H. Yin and L. Liu, *Marine Life Science & Technology*, 2021, **3**, 69-76.
3. V. Rukachaisirikul, S. Pramjit, C. Pakawatchai, M. Isaka and S. Supothina, *J Nat Prod*, 2004, **67**, 1953-1955.
4. J. Wang, C. C. Xu, H. Tang, L. Su, Y. Chou, K. Soong, J. Li, C. L. Zhuang, Y. P. Luo and W. Zhang, *Chem Biodivers*, 2018, **15**, e1800358.
5. A. Machara, J. Krivanek, K. Dolejšova, J. Havlickova, L. Bednarova, R. Hanus, P. Majer and P. Kyjakova, *J Nat Prod*, 2018, **81**, 2266-2274.
6. Z. Yang, M. Ge, Y. Yin, Y. Chen, M. Luo and D. Chen, *Chem Biodivers*, 2012, **9**, 403-408.
7. X. Y. Zhang, Z. L. Liu, B. D. Sun, S. B. Niu, M. H. Wang, X. M. Tan, Z. M. Zou and G. Ding, *J Agric Food Chem*, 2018, **66**, 8976-8982.
8. B. J. Magerlein and R. J. Reid, *J Antibiot (Tokyo)*, 1982, **35**, 254-255.
9. *US Pat.*, 4351769A, 1980.
10. A. Cimmino, A. Andolfi, S. Fondevilla, M. A. Abouzeid, D. Rubiales and A. Evidente, *J Agric Food Chem*, 2012, **60**, 5273-5278.
11. W.-X. Wang, M.-J. Zheng, J. Li, T. Feng, Z.-H. Li, R. Huang, Y.-S. Zheng, H. Sun, H.-L. Ai and J.-K. Liu, *Phytochemistry Letters*, 2019, **29**, 41-46.
12. C. F. Pérez Hemphill, G. Daletos, Z. Liu, W. Lin and P. Proksch, *Tetrahedron Letters*, 2016, **57**, 2078-2083.
13. C.-O. Seo, H.-C. Oh, H. B. Lee, J.-K. Kim, I.-S. Kong and S.-C. Ahn, *Bulletin of the Korean Chemical Society* 2007, **28**, 1803-1806.
14. Q. Tan, X. Yan, X. Lin, Y. Huang, Z. Zheng, S. Song, C. Lu and Y. Shen, *Helvetica Chimica Acta*, 2007, **90**, 1811-1817.
15. K. K. Li, Y. J. Lu, X. H. Song, Z. G. She, X. W. Wu, L. K. An, C. X. Ye and Y. C. Lin, *Bioorg Med Chem Lett*, 2010, **20**, 3326-3328.
16. M. Zheng, Z. L. Xu, R. M. Yang, S. C. Hu, G. Ding, J. C. Qin and Y. G. Zhang, *J Antibiot (Tokyo)*, 2020, **73**, 471-474.
17. A. Evidente, R. Capasso, M. A. Abouzeid, R. Lanzetta, M. Vurro and A. Bottalico, *Journal of Natural Products*, 1993, **56**, 1937-1943.
18. K. Harms, A. Milic, A. M. Stchigel, M. Stadler, F. Surup and Y. Marin-Felix, *J Fungi (Basel)*, 2021, **7**.
19. S. H. Wu, Y. W. Chen, S. C. Shao, L. D. Wang, Z. Y. Li, L. Y. Yang, S. L. Li and R. Huang, *J Nat Prod*, 2008, **71**, 731-734.
20. B. Bodo, L. Molho, D. Davoust and D. Molho, *Phytochemistry*, 1983, **22**, 447-451.
21. W. C. Tayone, S. Shindo, T. Murakami, M. Hashimoto, K. Tanaka and N. Takada, *Tetrahedron*, 2009, **65**, 7464-7467.
22. M. Arayama, H. Maeda, K. Tanaka, N. Takada, T. Nehira and M. Hashimoto, *Tetrahedron*, 2015, **71**, 7900-7905.
23. J. Courtial, L. Hamama, J. J. Helesbeux, M. Lecomte, Y. Renaux, E. Guichard, L. Voisine, C. Yovanopoulos, B. Hamon, L. Oge, P. Richomme, M. Briard, T. Boureau, S. Gagne, P. Poupard and R. Berruyer, *Front Plant Sci*, 2018, **9**, 502.
24. J. Courtial, J. J. Helesbeux, H. Oudart, S. Aligon, M. Bahut, B. Hamon, G. N'Guyen, S. Pigne, A. G. Hussain, C. Pascouau, N. Bataille-Simoneau, J. Collemare, R. Berruyer and P. Poupard, *Sci Rep*, 2022, **12**, 8155.
25. N. Lindquist and W. Fenical, *Tetrahedron Letters*, 1989, **30**, 2735-2738.
26. M. S. Congreve, A. B. Holmes, A. B. Hughes and M. G. Looney, *Journal of the American Chemical Society*, 1993, **115**, 5815-5816.
27. J. Fuchser and A. Zeeck, *Liebigs Annalen*, 1997, **1**, 87-95.
28. M. G. Malmierca, J. Barua, S. P. McCormick, I. Izquierdo-Bueno, R. E. Cardoza, N. J. Alexander, R. Hermosa, I. G. Collado, E. Monte and S. Gutierrez, *Environ Microbiol*, 2015, **17**, 1103-1118.
29. M. G. Malmierca, I. Izquierdo-Bueno, S. P. McCormick, R. E. Cardoza, N. J. Alexander, J. Barua, L. Lindo, P. A. Casquero, I. G. Collado, E. Monte and S. Gutierrez, *Environ Microbiol*, 2016, **18**, 3991-4004.
30. A. A. Sy, D. C. Swenson, J. B. Gloer and D. T. Wicklow, *J Nat Prod*, 2008, **71**, 415-419.
31. M. J. Ackland, J. R. Hanson, P. B. Hitchcock and A. H. Ratcliffe, *Journal of the Chemical Society, Perkin Transactions 1*, 1985, DOI: 10.1039/P19850000843, 843-847.

32. J. L. Oller-Lopez, M. Iranzo, S. Mormeneo, E. Oliver, J. M. Cuerva and J. E. Oltra, *Org Biomol Chem*, 2005, **3**, 1172-1173.
33. J. Zhang, L. L. Meng, J. J. Wei, P. Fan, S. S. Liu, W. Y. Yuan, Y. X. Zhao and D. Q. Luo, *Molecules*, 2017, **22**.
34. H. M. Herath, M. Jacob, A. D. Wilson, H. K. Abbas and N. P. Nanayakkara, *Nat Prod Res*, 2013, **27**, 1562-1568.
35. L. Song, K. H. Lee, Z. Lin and R. Tong, *J Org Chem*, 2014, **79**, 1493-1497.
36. E. Demole, B. Willhalm and M. Stoll, *Helvetica Chimica Acta*, 1964, **47**, 1152-1159.
37. M. Inoue, H. Takenaka, T. Tsurushima, H. Miyagawa and T. Ueno, *Tetrahedron Letters*, 1996, **37**, 5731-5734.
38. Y. Sadahiro, Y. Hitora and S. Tsukamoto, *J Nat Prod*, 2021, **84**, 3131-3137.
39. S. Bang, H. E. Kwon, J. Y. Baek, D. S. Jang, S. Kim, S. J. Nam, D. Lee, K. S. Kang and S. H. Shim, *Bioorg Chem*, 2020, **105**, 104449.
40. M. E. Bungihan, M. A. Tan, H. Takayama, T. E. D. Cruz and M. G. Nonato, *Philippine Science Letters*, 2013, **6**, 57-73.
41. S. Omura, R. Iwata, Y. Iwai, S. Taga, Y. Tanaka and H. Tomoda, *J Antibiot (Tokyo)*, 1985, **38**, 1322-1326.
42. R. R. Rasmussen, M. H. Scherr, D. N. Whittern, A. M. Buko and J. B. McAlpine, *J Antibiot (Tokyo)*, 1987, **40**, 1383-1393.
43. M. Jackson, J. P. Karwowski, R. J. Theriault, P. B. Fernandes, R. C. Semon and W. L. Kohl, *J Antibiot (Tokyo)*, 1987, **40**, 1375-1382.
44. F. Vinale, J. Strakowska, P. Mazzei, A. Piccolo, R. Marra, N. Lombardi, G. Manganiello, A. Pascale, S. L. Woo and M. Lorito, *Nat Prod Res*, 2016, **30**, 2575-2581.
45. K. Trisuwana, V. Rukachaisirikul, S. Phongpaichit, S. Preedanon and J. Sakayaroj, *Arch Pharm Res*, 2011, **34**, 709-714.
46. A. Evidente, A. Cimmino, A. Berestetskiy, A. Andolfi and A. Motta, *J Nat Prod*, 2008, **71**, 1897-1901.
47. S. Lu, T. Kurtán, G. Yang, P. Sun, A. Mándi, K. Krohn, S. Draeger, B. Schulz, Y. Yi, L. Li and W. Zhang, *Eur. J. Org. Chem*, 2011, **28**, 5452-5459.
48. S. Lu, P. Sun, T. Li, T. Kurtan, A. Mandi, S. Antus, K. Krohn, S. Draeger, B. Schulz, Y. Yi, L. Li and W. Zhang, *J Org Chem*, 2011, **76**, 9699-9710.
49. S. Grabley, E. Granzer, K. Hutter, D. Ludwig, M. Mayer, R. Thiericke, G. Till, J. Wink, S. Philipps and A. Zeeck, *J Antibiot (Tokyo)*, 1992, **45**, 56-65.
50. A. Gohrt, A. Zeeck, K. Hutter, R. Kirsch, H. Kluge and R. Thiericke, *J Antibiot (Tokyo)*, 1992, **45**, 66-73.
51. H. N. Putra, V. Rukachaisirikul, S. Saithong, S. Phongpaichit, S. Preedanon, J. Sakayaroj, S. Hadsadee and S. Jungstutwong, *Tetrahedron*, 2019, **75**, 130530.
52. S. Grabley, P. Hammann, K. Hutter, R. Kirsch, H. Kluge, R. Thiericke, M. Mayer and A. Zeeck, *J Antibiot (Tokyo)*, 1992, **45**, 1176-1181.
53. Y. Hu, J. Li, J. Li, F. Zhang, J. Wang, M. Mo and Y. Liu, *FEMS Microbiol Lett*, 2019, **366**.
54. M. Mayer and R. Thiericke, *J Antibiot (Tokyo)*, 1993, **46**, 1372-1380.
55. Y. Liu, L. Cheng and Y. Shen, *Chem Biodivers*, 2021, **18**, e2001055.
56. M. Hu, X. Q. Yang, C. P. Wan, B. Y. Wang, H. Y. Yin, L. J. Shi, Y. M. Wu, Y. B. Yang, H. Zhou and Z. T. Ding, *RSC Adv*, 2018, **8**, 41810-41817.
57. T. S. Bugni, J. E. Janso, R. T. Williamson, X. Feng, V. S. Bernan, M. Greenstein, G. T. Carter, W. M. Maiese and C. M. Ireland, *J Nat Prod*, 2004, **67**, 1396-1399.
58. H. Niwa, H. Inagaki and K. Yamada, *Tetrahedron Letters*, 1991, **32**, 5127-5128.
59. H. Niwa, M. Watanabe, H. Inagaki and K. Yamada, *Tetrahedron*, 1994, **50**, 7385-7400.
60. T. Ishida and K. Wada, *Journal of the Chemical Society, Chemical Communications*, 1975, DOI: 10.1039/C39750000209, 209-210.
61. K. Wada and T. Ishida, *Journal of the Chemical Society, Perkin Transactions 1*, 1979, DOI: 10.1039/P19790001154, 1154-1158.
62. A. Farooq, J. Gordon, J. R. Hanson and J. A. Takahashi, *Phytochemistry*, 1995, **38**, 557-558.
63. K. Wada and T. Ishida, *Journal of the Chemical Society, Chemical Communications*, 1976, DOI: 10.1039/C39760000340, 340-341.
64. A. Shimada, M. Kusano, K. Matsumoto, M. Nishibe, T. Kawano and Y. Kimurab, *Zeitschrift für Naturforschung B*, 2002, **57**, 239 - 242.
65. H. Jayasuriya, D. Zink, A. Basilio, F. Vicente, J. Collado, G. Bills, M. L. Goldman, M. Motyl, J. Huber, G. Dezeny, K. Byrne and S. B. Singh, *J Antibiot (Tokyo)*, 2009, **62**, 265-269.
66. J. F. Rivero-Cruz, G. García-Aguirre, C. M. Cerda-García-Rojas and R. Mata, *Tetrahedron*, 2000, **56**, 5337-5344.

67. A. Dalinova, V. Dubovik, L. Chisty, D. Kochura, A. Ivanov, S. Smirnov, M. Petrova, A. Zolotarev, A. Evidente and A. Berestetskiy, *J Agric Food Chem*, 2019, **67**, 13040-13050.
68. A. Dalinova, A. Fedorov, V. Dubovik, O. Voitsekhovskaja, E. Tyutereva, S. Smirnov, D. Kochura, L. Chisty, I. Senderskiy and A. Berestetskiy, *J Fungi (Basel)*, 2021, **7**.
69. J. F. Rivero-Cruz, M. Macías, C. M. Cerda-García-Rojas and R. Mata, *Journal of Natural Products*, 2003, **66**, 511-514.
70. V. Dubovik, A. Dalinova and A. Berestetskiy, *Plants (Basel)*, 2020, **9**.
71. B. Fischer, H. Anke and O. Sterner, *Natural Product Letters*, 1995, **7**, 303-308.
72. K. Gotz, J. C. Liermann, E. Thines, H. Anke and T. Opatz, *Org Biomol Chem*, 2010, **8**, 2123-2130.
73. Y. Liu, T. Kurtán, A. Mándi, H. Weber, C. Wang, R. Hartmann, W. Lin, G. Daletos and P. Proksch, *Tetrahedron Letters*, 2018, **59**, 632-636.
74. J. Xu, H. Tan, Y. Chen, S. Li, Z. Huang, H. Guo, H. Li, X. Gao, H. Liu and W. Zhang, *Organic Chemistry Frontiers*, 2018, **5**, 1792-1797.
75. K. Melnik, M. Menke, A. Rakotoarison, M. Vences and S. Schulz, *Org Lett*, 2019, **21**, 2851-2854.
76. P. S. Peram, M. Vences and S. Schulz, *Org Biomol Chem*, 2017, **15**, 6967-6977.
77. H. E. Ortega, Y. Y. Shen, K. TenDyke, N. Ríos and L. Cubilla-Ríos, *Tetrahedron Letters*, 2014, **55**, 2642-2645.
78. D. Poth, P. S. Peram, M. Vences and S. Schulz, *J Nat Prod*, 2013, **76**, 1548-1558.
79. A. S. Ratnayake, W. Y. Yoshida, S. L. Mooberry and T. Hemscheidt, *Org Lett*, 2001, **3**, 3479-3481.
80. M. A. Mondol, J. Farhouse, M. T. Islam, A. Schuffler and H. Laatsch, *J Nat Prod*, 2017, **80**, 347-355.
81. M. Tsuda, T. Mugishima, K. Komatsu, T. Sone, M. Tanaka, Y. Mikami and J. Kobayashi, *Journal of Natural Products*, 2003, **66**, 412-415.
82. W. B. Botero, M. R. de Amorim, Z. C. Iracilda, M. C. Polesi and L. C. dos Santos, *J Braz Chem Soc*, 2020, **31**, 364-369.
83. T. H. Quang, D. C. Kim, P. Van Kiem, C. Van Minh, N. X. Nhiem, B. H. Tai, P. H. Yen, N. Thi Thanh Ngan, H. J. Kim and H. Oh, *J Antibiot (Tokyo)*, 2018, **71**, 826-830.
84. T. H. Quang, N. X. Nhiem, B. H. Tai, P. H. Yen, D. T. Dung, N. T. T. Ngan, H. Le Tuan Anh, C. Van Minh and P. Van Kiem, *Vietnam Journal of Chemistry*, 2018, **56**, 434-439.
85. W. Bhilabutra, T. Techowisan, J. F. F. Peberdy and S. Lumyong, *Research Journal of Microbiology*, 2007, **2**, 749-755.
86. H.-K. Fun, W. Bhilabutra, P. Tuntiwachwuttikul and S. Chantrapromma, *Acta Crystallographica Section E*, 2006, **62**, o2478-o2480.
87. O. Papendorf, G. M. König, A. D. Wright, I. Chorus and A. Oberemm, *J Nat Prod*, 1997, **60**, 1298-1300.
88. D. B. Stierle, A. A. Stierle, T. Bugni and G. Loewen, *J Nat Prod*, 1998, **61**, 251-252.
89. K. Tidgewell, B. R. Clark and W. H. Gerwick, in *Comprehensive Natural Products II*, eds. H.-W. Liu and L. Mander, Elsevier, Oxford, 2010, DOI: 10.1016/B978-008045382-8.00041-1, pp. 141-188.
90. P. Sun, S. Lu, T. V. Ree, K. Krohn, L. Li and W. Zhang, *Curr Med Chem*, 2012, **19**, 3417-3455.
91. S. Boonphong, P. Kittakoop, M. Isaka, D. Pittayakhajonwut, M. Tanticharoen and Y. Thebtaranonth, *J Nat Prod*, 2001, **64**, 965-967.
92. *US Pat.*, 4148883A, 1979.
93. W. D. Celmer, G. N. Chmurny, C. E. Moppett, R. S. Ware, P. C. Watts and E. B. Whipple, *Journal of the American Chemical Society*, 1980, **102**, 4203-4209.
94. J. K. Sohng, T. Yamaguchi, C. N. Seong, K. S. Baik, S. C. Park, H. J. Lee, S. Y. Jang, J. R. Simkhada and J. C. Yoo, *Archives of Pharmacal Research*, 2008, **31**, 1339-1345.
95. *US Pat.*, 4224314, 1979.
96. *EU Pat.*, 0109750B1, 1984.
97. *US Pat.*, 4436747A, 1984.
98. Y. H. Tang, T. T. Liang, T. T. Fan, L. J. Keen, X. D. Zhang, L. Xu, Q. Zhao, R. Zeng and B. N. Han, *Nat Prod Res*, 2020, **34**, 2151-2156.
99. H. A. Whaley, C. G. Chidester, S. A. Mizesak and R. J. Wnuk, *Tetrahedron Letters*, 1980, **21**, 3659-3662.
100. D. S. Lee, W. Ko, T. H. Quang, K. S. Kim, J. H. Sohn, J. H. Jang, J. S. Ahn, Y. C. Kim and H. Oh, *Mar Drugs*, 2013, **11**, 4510-4526.
101. *KR Pat.*, 20150134491A, 2014.
102. D. Weber, O. Sterner, T. Anke, S. Gorzalczancy, V. Martino and C. Acevedo, *The Journal of Antibiotics*, 2004, **57**, 559-563.
103. X. Du, C. Lu, Y. Li, Z. Zheng, W. Su and Y. Shen, *The Journal of Antibiotics*, 2008, **61**, 250-253.
104. X. Lin, C.-H. Lu and Y.-M. Shen, *Chinese Journal of Natural Medicines*, 2008, **6**, 391-394.

105. A. Ito, H. Maeda, A. Tonouchi and M. Hashimoto, *Biosci Biotechnol Biochem*, 2015, **79**, 1067-1069.
106. Y.-Y. Li, M.-Z. Wang, Y.-J. Huang and Y.-M. Shen, *Mycology*, 2010, **1**, 254-261.
107. B. P. Moore and W. V. Brown, *Australian Journal of Chemistry*, 1976, **29**, 1365-1374.
108. D. Poth, K. C. Wollenberg, M. Vences and S. Schulz, *Angew Chem Int Ed Engl*, 2012, **51**, 2187-2190.
109. A. Evidente, R. Lanzetta, R. Capasso, M. Vurro and A. Botralico, *Phytochemistry*, 1993, **34**, 999-1003.
110. Y. Gao, F. F. Duan, L. Liu, X. G. Peng, X. G. Meng and H. L. Ruan, *J Nat Prod*, 2021, **84**, 483-494.
111. S. Lu, S. Nishimura, K. Takenaka, M. Ito, T. Kato and H. Kakeya, *Org Lett*, 2018, **20**, 4406-4410.
112. A. Evidente, R. Lanzetta, R. Capasso, A. Andolfi, A. Bottalico, M. Vurro and M. C. Zonno, *Phytochemistry*, 1995, **40**, 1637-1641.
113. A. Evidente, R. Lanzetta, R. Capasso, A. Andolfi, M. Vurro and M. C. Zonno, *Phytochemistry*, 1997, **44**, 1041-1045.
114. A. Evidente, R. Capasso, A. Andolfi, M. Vurro and M. C. Zonno, *Phytochemistry*, 1998, **48**, 941-945.
115. M. Nukina, T. Sassa and M. Ikeda, *Tetrahedron Letters*, 1980, **21**, 301-302.
116. M. Nukina, M. Ikeda and T. Sassa, *Agricultural and Biological Chemistry*, 1980, **44**, 2761-2762.
117. S. Takahashi, N. Kakinuma, K. Uchida, R. Hashimoto, T. Yanagisawa and A. Nakagawa, *J Antibiot (Tokyo)*, 1998, **51**, 596-598.
118. S. Lu, S. Nishimura, G. Hirai, M. Ito, T. Kawahara, M. Izumikawa, M. Sodeoka, K. Shin-ya, T. Tsuchida and H. Kakeya, *Chem Commun (Camb)*, 2015, **51**, 8074-8077.
119. Y. Jiang, S. Lu, G. Hirai, T. Kato, H. Onaka and H. Kakeya, *Tetrahedron Letters*, 2019, **60**, 1072-1074.
120. S. Lu, S. Nishimura, M. Ito, T. Tsuchida and H. Kakeya, *J Nat Prod*, 2016, **79**, 1891-1895.
121. M. Chu, R. Mierzwa, L. Xu, L. He, J. Terracciano, M. Patel, V. Gullo, T. Black, W. Zhao, T. M. Chan and A. T. McPhail, *J Nat Prod*, 2003, **66**, 1527-1530.
122. N. T. Hiep, Y. H. Choi, N. Kim, S. S. Hong, S. B. Hong, B. Y. Hwang, H. J. Lee, S. J. Lee, D. S. Jang and D. Lee, *J Nat Prod*, 2012, **75**, 784-788.
123. R. Koike, Y. Watanabe, K. Kato, Y. Mikasa, K. Shimizu, K. Nonaka, M. Honsho, T. Suga, R. Hokari, A. Ishiyama, Y. Asami and M. Iwatsuki, *J Antibiot (Tokyo)*, 2022, **75**, 199-206.
124. K. Kinoshita, T. Sasaki, M. Awata, M. Takada and S. Yaginuma, *J Antibiot (Tokyo)*, 1997, **50**, 961-964.
125. O. Yuzikhin, G. Mitina and A. Berestetskiy, *J Agric Food Chem*, 2007, **55**, 7707-7711.
126. A. Evidente, A. Cimmino, A. Berestetskiy, G. Mitina, A. Andolfi and A. Motta, *J Nat Prod*, 2008, **71**, 31-34.
127. K. Chakraborty and P. Francis, *Bioorg Chem*, 2020, **103**, 104140.
128. Y.-H. Wu, Z.-H. Zhang, Y. Zhong, J.-J. Huang, X.-X. Li, J.-Y. Jiang, Y.-Y. Deng, L.-H. Zhang and F. He, *RSC Advances*, 2017, **7**, 40015-40019.
129. M. J. Ackland, J. R. Hanson, P. B. Hitchcock, R. P. Mabelis and A. H. Ratcliffe, *Journal of the Chemical Society, Perkin Transactions 1*, 1984, DOI: 10.1039/P19840002755, 2755-2757.
130. M. Masi, S. Castaldi, F. Sautua, G. Pescitelli, M. A. Carmona and A. Evidente, *J Agric Food Chem*, 2022, **70**, 9834-9844.
131. W. A. Ayer, M. Sun, L. M. Browne, L. S. Brinen and J. Clardy, *Journal of Natural Products*, 1992, **55**, 649-653.
132. R. A. Edrada, M. Heubes, G. Brauers, V. Wray, A. Berg, U. Grafe, M. Wohlfarth, J. Muhlbacher, K. Schaumann, S. Sudarsono, G. Bringmann and P. Proksch, *J Nat Prod*, 2002, **65**, 1598-1604.
133. W. Ebrahim, A. H. Aly, A. Mándi, F. Totzke, M. H. G. Kubbutat, V. Wray, W.-H. Lin, H. Dai, P. Proksch, T. Kurtán and A. Debbab, *European Journal of Organic Chemistry*, 2012, **2012**, 3476-3484.
134. Y.-Y. Li, Z.-Y. Hu and Y.-M. Shen, *Natural Product Communications*, 2011, **6**, 1843-1846.
135. V. Sharma, V. Singamaneni, N. Sharma, A. Kumar, D. Arora, M. Kushwaha, S. Bhushan, S. Jaglan and P. Gupta, *Bioorg Med Chem Lett*, 2018, **28**, 2217-2221.
136. E. G. Baraban, J. B. Morin, G. M. Phillips, A. J. Phillips, S. A. Strobel and J. Handelsman, *Tetrahedron Lett*, 2013, **54**, 4058-4060.
137. R. Xu, C. Lu, X. Wu, C. Lin and Z. Zheng, *Chemistry of Natural Compounds*, 2009, **45**, 797-799.
