# Supplementary material for: Natural ten-membered lactones: sources, structural diversity, biological activity, and intriguing future
Source: Royal Society of Chemistry journal article supplement (doi:10.1039/d3np00013c), 2023-10-27
Supplement: d3np00013c2.xlsx [file d3np00013c2.xlsx]

## Sheet: Лист1
	Reviewed by Dräeger et al., 1996		Natural Ten-Membered Lactones: Sources, Structural Diversity, Biological Activity, and Intriguing Future
	Reviewed by Sun et al., 2012
	Reviewed by Dubovik et al., 2023 (present review)
#	Compounds	Natural Source	Taxonomy Kingdom / Phylum (Class, Order)	Molecular Formula	M/W, Da	References	Activities	Comments
1	Diplodialide A	Diplodia pinea IF0 6472	Fungi / Ascomycota	C10H14O3	182	10.1039/C39750000209 10.1039/P19790001154	Enzyme inhibitory activity Steroid 11a-hydroxylase in the cells of Rhizopus stolonifer (IF0 5781) at a concentration of 25 p.p.m.
2	Diplodialide B	Diplodia pinea IF0 6472 Cephalosporium aphidicola IMI 68689	Fungi / Ascomycota	C10H16O3	184	10.1039/P19790001154 10.1016/0031-9422(94)00723-7	Not tested
3	Diplodialide C	Diplodia pinea IF0 6472	Fungi / Ascomycota	C10H18O3	186	10.1039/P19790001154	Not tested
4	Diplodialide D	Diplodia pinea IF0 6472	Fungi / Ascomycota	C10H16O4	200	10.1039/C39760000340 10.1039/P19790001154	Not tested
5	Nargenicin A1 (CP-47,444, CS-682)	Nocardia argentinensis ATCC 31306 Nocardia sp. CS682	Bacteria / Actinomycetia	C28H37NO8	515	Patent US4148883 https://patentimages.storage.googleapis.com/37/04/a5/80ff5bbfdaaa54/US4148883.pdf 10.1021/ja00532a036 10.1007/s12272-001-2115-0	Antimicrobial activity, MIC, µg/mL Alcaligenes faecalis ATCC 1004 - >80 Enterococcus faecalis ATCC 29212 - >80 Bacillus subtilis ATCC 6633 - >80 Staphylococcus aureus KCTC 1928 - 0.6 Micrococcus luteus ATCC 9341 - 2.5 Mycrobacterium smegmatis ATCC 9341 - >80 Salmonella typhimrium KCTC 1925 - >80 Escherrichia coli KCTC 1923 - >80 Pseudomonas aeruginosa KCTC 1637 - >80 MRSA 693E - 0.3 MRSA 5-3 - 0.…
6	18-deoxynargenicin A1 (antibiotic 367c)	Saccharopolyspora hirsuta, strain 367 (UC® 8106, NRRL 10245)	Bacteria / Actinomycetia	C28H37NO7	499	10.7164/antibiotics.35.254	Antibacterial activity, MIC (µg/mL) Staphylococcus aureus UC 76 - 0.78 S. aureus UC 6685 - 1.56 S. aureus UC 6690 - 1.56 Streptococcus faecalis UC 694 - >100 S. viridans UC 153 - 25 S. pyogenes UC 152 - 25 S. pneumoniae UC 41 - 12.5 Klebsiella pneumoniae UC 58 - >100 When administered infected subcutaneously to mice infected with Staphylococcus aureus UC 76 ANTIBIOTIC 367c was inactive at 100 mg/…
7	Nargenicin B1 (CP 51467)	Nocardia argentinensis ATCC 31438	Bacteria / Actinomycetia	C29H39NO10	561	Patent US-4224314-A https://portal.unifiedpatents.com/patents/patent/US-4224314-A	Antimicrobial activity, µg/mL Staphylococcus aureus 01A005 - 0.78 Staphylococcus aureus 01A052 - 0.78 Staphylococcus aureus 01A109 R - 0.39 Staphylococcus aureus 01A110 R - 1.56 Staphylococcus aureus 01A400 R - 0.39 Staphylococcus epidermidis 0B087 - 6.25 Staphylococcus epidermidis 01B111 - 1.56 Staphylococcus epidermidis 01B126 - 1.56 Streptococcus faecalis 02A006 - >200 Streptococcus agalactiae…
8	Nargenicin B2	Nocardia sp.	Bacteria / Actinomycetia	C28H37NO9	531	https://patents.google.com/patent/EP0109750B1 Patent EP0109750B1	No data available (investigated by Pfizer Inc.)
9	Nargenicin B3	Nocardia sp.	Bacteria / Actinomycetia	C28H37NO9	531	https://patents.google.com/patent/EP0109750B1 Patent EP0109750B1	No data available (investigated by Pfizer Inc.)
10	Nargenicin C1 (CP-57820)	Nocardia sp. N467-32	Bacteria / Actinomycetia	C30H41NO10	575	Patent EP0109750B1 https://patentimages.storage.googleapis.com/b5/be/c0/53ab5f969775d9/EP0109750B1.pdf Patent US4436747A https://patentimages.storage.googleapis.com/fd/d8/a4/b906ff9e42889e/US4436747.pdf	Antibacterial activity Micrococcus luteus ATCC 9341 Staphylococcus aureus ATCC 6538 No details available (investigated by Pfizer Inc.)
11	18-deoxynodusmicin A1 (U-61,732)	Saccharopolyspora hirsuta 367, NRRL 12045	Bacteria / Actinomycetia	C28H37NO7	499	https://patents.google.com/patent/US4351769A/en	Antibacterial activity, 1 mg/ml, mm B. subtilis UC 564 - 15 B. subtilis UC 6033 - 17 S. aureus UC 70 - 27 S. aureus UC 3665 - 30 S. aureus UC 6029 - 26 S. lutea UC 130 - 31 S. lutea UC 3383 - 31 S. lutea sens - 36 K. pneumoniae UC 58 - 18 E. coli UC 51 - 0 S. schottnuelleri UC 126 - 0 P. vulgaris UC 93 - 0 P. aeruginosa UC 95 - - M. avian UC 159 - 26 P. oxalicum UC 1268 - 0 S. pastorianus UC 1342…
12	Nodusmicin	Saccharopolyspora hirsuta 367 (UC® 8106, NRRL 10245)	Bacteria / Actinomycetia	C23H34O7	422	10.1016/S0040-4039(00)78737-5	Antibacterial activity Mycobacterium avium Sarcina lutea Klebsiella pneumoniae Bacteroides fragilis Clostridium perfringens No details available (investigated by The Upjohn Company)
13	Coloradocin = Luminamicin	Nocardioides OMR-59 Actinoplanes coloradoensis	Bacteria / Actinomycetia	C32H38O12	614	10.7164/antibiotics.38.1322 10.7164/antibiotics.40.1375 10.7164/antibiotics.40.1383	Antimicrobial activity, µg/mL (Coloradocin) Bacteroides bivius B 6140 - 32 B. disiens ATCC 29426 - 32 B. fragilis ATCC 25285 - 32 B. fragilis 784 - 32 B. fragilis UC-2 - 32 B. fragilis SFM 2906A - 16 B. fragilis SFM 2975-7 - 16 B. fragilis SFM 2929-1 - 64 B. loescheii ATCC 15930 - 64 B. melaninogenicus ATCC 25845 - 32 B. thetaiotaomicron ATCC 29741 - 0.5 B. thetaiotaomicron ATCC 29742 - 32 B. the…	Coloradocin is related to a small class of antibiotics which include nodusmicin and nargenicin and was shown to be identical to luminamicin for which no structure has been reported.
14	Pyrenolide A	Pyrenophora teres IF0 7508 Curvularia sp. PSU-F22 Curvularia sp. M12	Fungi / Ascomycota	C10H10O4	194	10.1016/S0040-4039(00)71195-6 10.1007/s12272-011-0502-8 10.1021/acs.jnatprod.6b00785	Motility Inhibitory Activity against Phytophthora capsici (inhibition) dose 0.5 μg/mL: 15 min - 81% 30 min - 100 % 45 min - 100 % 60 min - 100 % dose 1 μg/mL: 15 min - 90% 30 min - 100 % 45 min - 100 % 60 min - 100 % Zoosporicidal Activity against Phytophthora capsici (lysis) dose 0.5 μg/mL: 45 min - 4% 60 min - 5% dose 1 μg/mL: 45 min - 5% 60 min - 7% dose 2.5 μg/mL: 30 min - 5% 45 min - 20% 60 …
15	Pyrenolide B	Pyrenophora teres IF0 7508	Fungi / Ascomycota	C10H12O3	180	10.1271/bbb1961.44.2761	Not tested
16	Pyrenolide C	Pyrenophora teres IF0 7508	Fungi / Ascomycota	C10H12O4	196	10.1271/bbb1961.44.2761	Not tested
17	Ascidiatrienolide A	Didemnum candidum	Animalia / Ascidiacea	C20H30O3	318	10.1021/ja00066a056 10.1016/S0040-4039(00)99112-3	Not tested	Was first described as a nine-membered lactone, then was revised as a ten-membered one
18	Ascidiatrienolide B	Didemnum candidum	Animalia / Ascidiacea	C20H30O3	320	10.1016/S0040-4039(00)99112-3	Not tested	Probably needs the structural revision
19	Ascidiatrienolide C	Didemnum candidum	Animalia / Ascidiacea	C20H30O3	320	10.1016/S0040-4039(00)99112-3	Not tested	Probably needs the structural revision
20	Tuckolide = Decarestrictine D	Polyporus tuberaster Penicillium simplicissimum FH-A 6090 Chaetomium piluliferum NRRL 38180	Fungi / Ascomycota	C10H16O5	216	10.1021/np50083a015 10.7164/antibiotics.45.56 10.7164/antibiotics.45.66 10.1021/np070610d	Antifeedant assay did not show activity in antifeedant assays with the corn earworm (Heliotbis zea) and the fungivorous beetle (Caqopbilus bmipterus). Inhibition of cholesterol biosynthesis in HepG2 cell line - 50% at concentration 0.1 μM Hypolipidemic activity rats, oral application (10 mg/kg daily for a total of 7 days) - antiatherogenic index (HDL-Cholesterol : LDL-Cholesterol) 172% of control…
21	Decarestrictine A1/A2	Penicillium simplicissimum FH-A 6090 Penicillium corylophilum FH-A 6360	Fungi / Ascomycota	C10H14O4	198	10.7164/antibiotics.45.56 10.7164/antibiotics.45.66	Inhibition of cholesterol biosynthesis, 0.1 μM in HepG2 cell line - 40% Antibacterial activity not active - no experimental details Antifungal activity not active - no experimental details Antiviral activity not active - no experimental details Antiprotozoal activity not active - no experimental details
22	Decarestrictine B	Penicillium simplicissimum FH-A 6090 Penicillium corylophilum FH-A 6360 Pseudopestalotiopsis sp. PSU-AMF45	Fungi / Ascomycota	C10H14O5	214	10.7164/antibiotics.45.56 10.7164/antibiotics.45.66 10.1016/j.tet.2019.130530	Inhibition of cholesterol biosynthesis, 0.1 μM in HepG2 cell line - 20% Antibacterial activity not active - no experimental details Antifungal activity not active - no experimental details Antiviral activity not active - no experimental details Antiprotozoal activity not active - no experimental details
23	Decarestrictine C1/C2	Penicillium simplicissimum FH-A 6090 Armillaria tabescens JNB-OZ344	Fungi / Ascomycota	C10H16O4	200	10.7164/antibiotics.45.56 10.7164/antibiotics.45.66 10.1080/14786419.2012.738206	Inhibition of cholesterol biosynthesis in HepG2 cell line - 30% at concentration 0.1 μM Antibacterial activity not active - no experimental details Antifungal activity not active - no experimental details Antiviral activity not active - no experimental details Antiprotozoal activity not active - no experimental details
24	Decarestrictine E	Penicillium simplicissimum FH-A 6090	Fungi / Ascomycota	C11H16O5	228	10.7164/antibiotics.45.1176	Inhibition of cholesterol biosynthesis, 0.1 μM in HepG2 cell line - not active
25	Decarestrictine F	Penicillium simplicissimum FH-A 6090	Fungi / Ascomycota	C10H12O4	196	10.7164/antibiotics.45.1176	Inhibition of cholesterol biosynthesis, 0.1 μM in HepG2 cell line - 37%
26	Decarestrictine G	Penicillium simplicissimum FH-A 6090	Fungi / Ascomycota	C10H16O5	216	10.7164/antibiotics.45.1176	Inhibition of cholesterol biosynthesis, 0.1 μM in HepG2 cell line - not active
27	Decarestrictine H	Penicillium simplicissimum FH-A 6090	Fungi / Ascomycota	C10H14O4	198	10.7164/antibiotics.45.1176	Inhibition of cholesterol biosynthesis, 0.1 μM in HepG2 cell line - 33%
28	Decarestrictine I	Penicillium simplicissimum FH-A 6090	Fungi / Ascomycota	C10H14O4	198	10.7164/antibiotics.45.1176	Inhibition of cholesterol biosynthesis, 0.1 μM in HepG2 cell line - 18%
29	Decarestrictine J	Penicillium simplicissimum FH-A 6090 Pseudoxanthomonas japonensis ZKB-2	Fungi / Ascomycota Bacteria / Gammaproteobacteria	C10H16O4	200	10.7164/antibiotics.45.1176 10.1093/femsle/fny287	Inhibition of cholesterol biosynthesis, 0.1 μM in HepG2 cell line - 26%
30	Decarestrictine K	Penicillium simplicissimum FH-A 6090	Fungi / Ascomycota	C10H14O4	198	10.7164/antibiotics.45.1176	Inhibition of cholesterol biosynthesis, 0.1 μM in HepG2 cell line - 7%
31	Decarestrictine N	Penicillium simplicissimum FH-A 6090	Fungi / Ascomycota	C10H16O5	216	10.7164/antibiotics.46.1372	Not tested
32	Decarestrictine O	Penicillium simplicissimum FH-A 6090	Fungi / Ascomycota	C10H16O5	216	10.7164/antibiotics.46.1372	Not tested
33	Didemnilactone A	Didemnum moseleyi	Animalia / Ascidiacea	C20H28O3	316	10.1016/S0040-4020(01)90469-7 10.1016/s0040-4039(00)93445-2	Enzyme inhibitory activity, IC50, μM 5-Lipoxygenase of Human PMNL - 9.4 15-Lipoxygenase of Human PMNL - 41 Binding activity to leukotriene B4 receptors of human polymorphonuclear leukocyte membrane fractions - IC50 38 μM
34	Didemnilactone B	Didemnum moseleyi	Animalia / Ascidiacea	C20H28O3	316	10.1016/S0040-4020(01)90469-7	Enzyme inhibitory activity, IC50, μM 5-Lipoxygenase of Human PMNL - 8.5
35	Neodidemnilactone	Didemnum moseleyi	Animalia / Ascidiacea	C20H30O3	318	10.1016/s0040-4039(00)93445-2 10.1016/S0040-4020(01)90469-7	Binding activity to leukotriene B4 receptors of human polymorphonuclear leukocyte membrane fractions. IC50 - 50 μM
36	Phoracantholide I	Phoracantha synonyma (Coleoptera : Cerambycidae) Mantidactylus femoralis	Animalia / Insecta Animalia / Amphibia	C10H18O2	170	10.1071/CH9761365 10.1021/np400131q	Not tested
37	Phoracantholide J	Phoracantha synonyma (Coleoptera : Cerambycidae) Mantidactylus multiplicatus	Animalia / Insecta Animalia / Amphibia	C10H16O2	168	10.1071/CH9761365 10.1002/anie.201106592	Not tested
38	Humicolactone	Gilmaniella humicola CBS 220.65	Fungi / Ascomycota	C10H12O5	212	10.1080/10575639508043226	Antimicrobial activity, MIC, μg/mL Bacillus brevis - 20 B. subtilis - 20 Sarcina lutea - 100 was only weakly inhibited Escherichia coli - not active at 100 μg/mL Streptomyces sp. ATCC 23836 - not active at 100 μg/mL Antifungal activity, MIC, μg/mL Nematospora coryli - 5 Mucor miehei - 50 Penicillium notatum - 50 Ustilago nuda - 50 Paecilornyces varioti - 100 Saccharomyces cerevisiae - 100 were we…
39	Thiobiscephalosporolide A	Cephalosporium aphidicola ACC 3490	Fungi / Ascomycota	C20H30SO8	430	10.1039/P19840002755	Not tested
40	Cephalosporolide B	Cephalosporium aphidicola ACC 3490	Fungi / Ascomycota	C10H14O4	198	10.1039/P19850000843	Not tested
41	Cephalosporolide C = Bassianolone = Cephalosporolide J	Cephalosporium aphidicola ACC 3490 Cordyceps militaris BCC 2816 Beauveria bassiana Isaria fumosorosea ACCC 37775 Armillaria tabescens JNB-OZ344	Fungi / Ascomycota	C10H16O5	216	10.1039/P19850000843 10.1021/np0401415 10.1021/jo402602h 10.1039/B417534D 10.1080/14786419.2012.738206 10.3390/molecules22122058	Antiparasitic activity Plasmodium falciparum K1 - not active at 20 µg/mL Antibacterial activity (Bassianolone), 100 µg/mL Bacillus megaterium - not active Staphylococcus aureus - 100% inhibition of visible growth Escherichia coli - not active Pseudomonas aeruginosa - not active Staphylococcus epidermidis - 100% inhibition of visible growth Streptococcus pyogenes - 100% inhibition of visible growt…
42	Cephalosporolide G	Cephalosporium aphidicola ACC 3490	Fungi / Ascomycota	C10H16O5	216	10.1016/0031-9422(94)00723-7	Not tested
43	Pinolidoxin = Lethaloxin	Ascochyta pinodes ITEM 1094 Didymella pinodes CO-99 Mycosphaerella lethalis Phoma bellidis HGX2	Fungi / Ascomycota	C18H26O6	338	10.1016/S0031-9422(00)90702-7 10.1021/jf300824d 10.1002/chin.199330294 10.1016/j.phytol.2018.11.012 10.1021/jo051353p 10.1021/np50101a011	Phytotoxic activity, mm, at 1 mg/mL Lupinus albus - 73.6 Medicago truncatula - 49.2 Pisum sativum - 45.5 Lens culinaris - 45.5 Lathyrus sativus - 41.9 Phaseolus vulgaris - 34.0 Pisum fulvum - 21.5 Cicer arietinum - 9.1 Vicia faba - 7.2 Chenopodium album - 47.8 Cirsium arvense - 25.0 Sonchus arvensis - 23.6 Mycotoxic/zootoxic activity Artemia salina - not active at 50 μg/mL Antifungal activity, 12…	The identity have been confirmed by Garcia-Fortanet et al., 2005 (10.1021/jo051353p)
44	7-epi-pinolidoxin	Ascochyta pinodes ITEM 1094 Didymella pinodes CO-99	Fungi / Ascomycota	C18H26O6	338	10.1021/np50101a011 10.1021/jf300824d	Phytotoxic activity, 1 mg/ml (15 μg of toxin/droplet) pea - necrotic lesions bean - necrotic lesions Mycotoxic/zootoxic activity Artemia salina - active at 50 μg/mL; not active at 5 μg/mL Antifungal activity, 120 μg/disk Geotrichum urndidm - not active
45	5,6-dihydropinolidoxin	Ascochyta pinodes ITEM 1094 Didymella pinodes CO-99	Fungi / Ascomycota	C18H28O6	340	10.1021/np50101a011 10.1021/jf300824d	Phytotoxic activity, 1 mg/mL (15 μg of toxin/droplet) pea - similar to those observed for pinolidoxin but broader in size bean - similar to those observed for pinolidoxin but broader in size Mycotoxic/zootoxic activity Artemia salina - not active at 50 μg/mL Antifungal activity, 120 μg/disk Geotrichum urndidm - not active
46	5,6-epoxypinolidoxin	Ascochyta pinodes ITEM 1094 Didymella pinodes CO-99	Fungi / Ascomycota	C18H26O7	354	10.1021/np50101a011 10.1021/jf300824d 10.1016/j.phytol.2018.11.012	Phytotoxic activity, 1 mg/ml (15 μg of toxin/droplet) pea - not active bean - not active Mycotoxic/zootoxic activity Artemia salina - active at 50 μg/mL; not active at 5 μg/mL Antifungal activity, 120 μg/disk Geotrichum urndidm - not active Cytotoxic activity HL-60 - not active A549 - not active SMMC-7721 - not active MCF-7 - not active SW480 - not active
47	Cétolactone (Jasmine ketolactone)	Jasminum grandiflorum L.	Plantae / Lamiales	C12H16O3	208	10.1002/hlca.19640470506	Not tested
48	Achaetolide	Achaetomium cristalliferum PC 3252 Achaetomium strumarium IMI 82624 Ophiobolus sp.	Fungi / Ascomycota	C16H28O5	300	10.1016/0031-9422(83)83021-0 10.1016/j.tet.2009.07.005 10.1016/J.TETLET.2010.09.070	Not tested
49	Sporostatin (M-5032)	Sporormiella sp. M5032 (FERM P-9506)	Fungi / Ascomycota	C14H14O5	262	10.7164/antibiotics.50.961	Enzyme inhibitory, IC50, µg/mL cyclic adenosine 3',5'-monophosphate phosphodiesterase (cAMP-PDE) - 41 Antibacterial activity, 1 mg/mL Staphylococcus aureus FDA-209P - not active Bacillus subtilis PCI-219 - not active Escherichia coli HIHJ34 - not active Pseudomonas aeruginosa ML-4262R - not active Antifungal activity, 1 mg/mL Candida albicans NI-7491 - not active Acute toxicity, intraperitoneally…
50	Mueggelone = Gloeolactone	Aphanizomenon flos-aquae Gloeotrichia sp.	Bacteria / Cyanophyceae	C18H28O3	292	10.1021/np970231s 10.1021/np9703398 10.2174/092986712801215874 10.1016/B978-008045382-8.00041-1	Anti Fish Embryo Larval Development Test zebra fish larvae - at a concentration of 10 µg/mL after 24 and 32 h, larvae showed 45% mortality. At a concentration of 1 µg/mL mueggelone had no obvious effects on larval development. Antibacterial activity, 50 µg/filter disk Bacillus megaterium - no significant activity Escherichia coli - no significant activity Antibacterial activity Vibrio harveyi - n…	Two natural products have the same structures. Their identity was noted by Tidgewel et al., 2010 (10.1016/B978-008045382-8.00041-1 )and Sun et al., 2012 (10.2174/092986712801215874)
51	Microcarpalide	Unidentified fungus	Fungi	C16H28O5	300	10.1021/ol016515s	Antimicrofilament activity A-10 - half of the cells at a concentration of 0.5-1.0 µg/mL Cytotoxic activity A-10 - сell death was observed at concentrations above 20 µg/mL Cytotoxic activity, IC50, µg/mL KB - 50 LoVo - 90
52	Sch 642305	Penicillium verrucosum ILF-16214	Fungi / Ascomycota	C14H20O4	252	10.1021/np0302302	Antibacterial activity, MIC, µg/mL E. coli strain with a defective lipopolysaccharide layer and disruption of the efflux pump acrAB - 40 Enzyme inhibitory, EC50 E.coli bacterial DNA primase - 70 µM
53	Modiolide A	Curvularia sp. PSU-F22 Paraphaeosphaeria sp. N119 Stagonospora cirsii C-163 Microsphaeropsis arundinis Paraconiothyrium sp. VK-13 Periconia siamensis CMUGE015 Roussoella siamensis SYSU‑MS4723 Curvularia sp. M12	Fungi / Ascomycota	C10H14O4	198	10.1007/s12272-011-0502-8 10.1021/np0203943 10.1021/np800415w 10.21577/0103-5053.20190189 10.1038/s41429-018-0073-8 10.1107/S1600536806018368 10.3923/jm.2007.749.755 10.1007/s42995-020-00066-8 10.1021/acs.jnatprod.6b00785 10.1002/vjch.201800026	Antibacterial activity Staphylococcus aureus ATCC 25923 - not active at 200 µg/mL methicillin-resistant S. aureus - not active at 200 µg/mL Antibacterial activity, MIC, µg/mL Micrococcus luteus - 16.7 Bacillus cereus - 3.12 Listeria monocytogenes - 6.25 Staphylococcus aureus (MRSA) - 25.0 Pseudomonas aeruginosa - 12.5 Escherichia coli - 50.0 Antifungal activity, MIC,µg/mL Neurospora crassa - 33.3…
54	Modiolide B	Curvularia sp. PSU-F22 Paraphaeosphaeria sp. N119 Paraconiothyrium sp. VK-13	Fungi / Ascomycota	C10H14O3	182	10.1007/s12272-011-0502-8 10.1021/np0203943 10.1038/s41429-018-0073-8	Antibacterial activity, MIC, µg/mL Micrococcus luteus - 16.7 Antibacterial activity Staphylococcus aureus ATCC 25923 - not active at 200 µg/mL methicillin-resistant S. aureus - not active at 200 µg/mL Antifungal activity, MIC, µg/mL Neurospora crassa - 33.3 Antifungal activity Microsporum gypseum SH-MU-4 - not active at 200 µg/mL Anti-inflammatory activity NO overproduction in LPS-stimulated RAW …
55	Putaminoxin A	Phoma putaminum	Fungi / Ascomycota	C12H20O3	212	10.1016/0031-9422(95)00505-2 10.1016/S0031-9422(96)00685-1	Phytotoxic activity, 2 mg/mL Annual fleabane - 3-5 mm Annual dog’s mercury - 3-5 mm Annual sowthistle - 0-1 mm Clover - not active Chickweed - not active Fat-hen - 0-1 mm Globe artichoke - 1-3 mm Mandarin - not active Nettle - 1-3 mm Parsley - chlorosis Strawberry - 0-1 mm Sweet basil - not active Swiss chard - not active Tomato - chlorosis Antifungal activity Geotrichum candidum - weak toxicity …
56	Putaminoxin B	Phoma putaminum	Fungi / Ascomycota	C14H24O3	240	10.1016/S0031-9422(96)00685-1	Phytotoxic activity Annual dog’s mercury - not active Globe artichoke - not active Tomato - not active Faba bean - not active Sorghum - not active Cucumber - not active Antibacterial activity Bacillus megaterium - not active at up to 40 μg/disk Pseudomonas sp. - not active at up to 40 μg/disk Antifungal activity Geotrichum candidum - not active at up to 50/μg/disk Mycotoxic/zootoxic activity Arte…
57	Putaminoxin C	Phoma putaminum	Fungi / Ascomycota	C12H18O3	210	10.1016/S0031-9422(96)00685-1	Phytotoxic activity, 0.8 mg/mL Annual dog’s mercury - necrotic spots Globe artichoke - necrotic spots Tomato - chlorosis Faba bean - not active Sorghum - not active Cucumber - not active Assayed at lower concentration, only the first dilution (0.4 mg/mL) still caused toxic effects. Antibacterial activity Bacillus megaterium - clear inhibition halo of the growth at up to 40 μg/disk Pseudomonas sp.…
58	Putaminoxin D	Phoma putaminum	Fungi / Ascomycota	C14H24O3	240	10.1016/S0031-9422(97)00879-0	Phytotoxic activity, 4*10^−3M Annual fleabane - not active Tomato - not active Antifungal activity Geotrichum candidum - not active at 20/μg/disk Mycotoxic/zootoxic activity Artemia salina - not active up to 4*10^-4 M
59	Putaminoxin E	Phoma putaminum	Fungi / Ascomycota	C12H22O3	214	10.1016/S0031-9422(97)00879-0	Phytotoxic activity, 4*10^−3M Annual fleabane - not active Tomato - not active Antifungal activity Geotrichum candidum - not active at 20/μg/disk Mycotoxic/zootoxic activity Artemia salina - not active up to 4*10^-4 M
60	Multiplolide A	Xylaria multiplex BCC 1111 Phomopsis sp. YM 311483 Phomopsis sp. NXZ-05	Fungi / Ascomycota	C10H14O5	214	10.1021/np000291p 10.1021/np070624j 10.1002/hlca.200790190	Antifungal activity, IC50, µg/mL Candida albicans - 7 (10.1021/np000291p) Candida albicans - not active at 200 µg/mL (10.1002/hlca.200790190) Antifungal activity, MIC, µg/mL (10.1021/np070624j) Aspergillus niger YM 3029 - 250 Botrytis cinerea YM 3061 - not active up to 500 µg/mL Fusarium avenaceum YM 3065 - not active up to 500 µg/mL Fusarium moniliforme YM 3067 - not active up to 500 µg/mL Helmi…
61	Multiplolide B	Xylaria multiplex BCC 1111	Fungi / Ascomycota	C14H18O6	282	10.1021/np000291p	Antifungal activity, IC50, µg/mL Candida albicans - 2 Antiparasitic activity Plasmodium falciparum - not active at 20 µg/mL Cytotoxic activity BC-1 - not active at 20 µg/mL KB - not active at 20 µg/mL
62	Xestodecalactone A	Penicillium cf. montanense	Fungi / Ascomycota	C14H16O5	264	10.1021/np020085c	Antibacterial activity Bacillus subtilis 168 - not active Staphylococcus aureus ATCC 25923 - not active Escherichia coli ATCC 25922 - not active Escherichia coli HB 101 - not active Antifungal activity Candida albicans - not active
63	Xestodecalactone B	Penicillium cf. montanense	Fungi / Ascomycota	C14H16O6	280	10.1021/np020085c	Antibacterial activity Bacillus subtilis 168 - not active Staphylococcus aureus ATCC 25923 - not active Escherichia coli ATCC 25922 - not active Escherichia coli HB 101 - not active Antifungal activity Candida albicans - 100µM - 25 mm, 50µM - 12 mm, 25µM - 7 mm
64	Xestodecalactone C	Penicillium cf. montanense	Fungi / Ascomycota	C14H16O6	280	10.1021/np020085c	Antibacterial activity Bacillus subtilis 168 - not active Staphylococcus aureus ATCC 25923 - not active Escherichia coli ATCC 25922 - not active Escherichia coli HB 101 - not active Antifungal activity Candida albicans - not active
65	Colletofragarone A1	Colletotrichum fragariae	Fungi / Ascomycota	C22H26O6	386	10.1016/0040-4039(96)01212-9	Not tested
66	Colletofragarone A2	Colletotrichum fragariae Colletotrichum sp. 13S020	Fungi / Ascomycota	C22H26O6	386	10.1016/0040-4039(96)01212-9 10.1021/acs.jnatprod.1c00913	Cytotoxic activity, IC50, μM Saos-2 (p53R175H) - 0.36
67	Aspinolide A	Aspergillus ochruceus DSM-7428	Fungi / Ascomycota	C10H16O3	184	10.1002/jlac.199719970114	Not tested
68	Aspinolide B	Aspergillus ochruceus DSM-7428 Trichoderma arundinaceum IBT 40837	Fungi / Ascomycota	C14H20O6	284	10.1002/jlac.199719970114 10.1111/1462-2920.12514 10.1111/1462-2920.13410	Antifungal activity, MIC, mg/mL Botrytis cinerea 98 - not active at 10 mg/mL Botrytis cinerea Bc05.10 - not active at 10 mg/mL Fusarium sporotrichioides - not active at 10 mg/mL Plant growth promotion Tomato - proliferation of lateral roots, without any negative effects on plant growth - 50 µg/mL
69	Aspinolide C	Aspergillus ochruceus DSM-7428 Trichoderma arundinaceum IBT 40837	Fungi / Ascomycota	C14H18O6	282	10.1002/jlac.199719970114 10.1111/1462-2920.12514 10.1111/1462-2920.13410	Antifungal activity, MIC, mg/mL Botrytis cinerea 98 - 0.54 Botrytis cinerea Bc05.10 - 0.34 Fusarium sporotrichioides - 0.21 Plant growth inhibition Tomato - significant reduction in the number of lateral roots and also in the size of the aerial parts of plants - 50 µg/mL Tomato - very strong reduction in root and above ground development - 250 µg/mL
70	Herbarumin I	Phoma herbarum Stagonospora cirsii S-47	Fungi / Ascomycota	C12H20O4	228	10.1016/s0040-4020(00)00469-5 10.1021/acs.jafc.9b04573 10.3390/jof7100829 10.1021/np020501t	Plant growth inhibition, IC50 (M) Amaranthus hypochondriacus - 5.43*10^-5 Plant growth inhibition, ID50, 10^−8 mole/seed Lettuce Seedlings - 35 Phytotoxic activity, (diameter/length of necrosis, mm), at 2 mg/mL (∼10 mM), 5 days post application Sonchus arvensis - 5.1 ± 1.3 Cirsium arvense - 7.9 ± 0.7 Elytrigia repens - 6.3 ± 4.8 Antialgal activity Haematococcus lacustris - not active Antibacteria…
71	Herbarumin II	Phoma herbarum Didymella pinodes CO-99 Paraphaeosphaeria recurvifoliae EML-PL001	Fungi / Ascomycota	C12H20O5	244	10.1016/s0040-4020(00)00469-5 10.1021/jf300824d 10.5012/bkcs.2007.28.10.1803 10.1021/np020501t	Plant growth inhibition, IC50 (M) Amaranthus hypochondriacus - 1.25*10^-4 Phytotoxic activity, [mm], at 1 mg/mL Lupinus albus - not active Medicago truncatula - not active Pisum sativum - not active Lens culinaris - not active Lathyrus sativus - not active Phaseolus vulgaris - not active Pisum fulvum - not active Cicer arietinum - not active Vicia faba - not active Chenopodium album - not active …
72	Herbarumin III	Phoma herbarum	Fungi / Ascomycota	C12H20O3	212	10.1021/np020501t	Plant growth inhibition, IC50 (M) Amaranthus hypochondriacus - 2*10^-5
73	2-epi-herbarumin II	Didymella pinodes CO-99 Phoma bellidis HGX2 Pestalotiopsis clavispora Paraphaeosphaeria recurvifoliae EML-PL001	Fungi / Ascomycota	C12H20O5	244	10.1021/jf300824d 10.1016/j.phytol.2018.11.012 10.1016/j.tetlet.2016.03.101 10.5012/bkcs.2007.28.10.1803	Phytotoxic activity, [mm], at 1 mg/mL Lupinus albus - not active Medicago truncatula - not active Pisum sativum - not active Lens culinaris - not active Lathyrus sativus - not active Phaseolus vulgaris - not active Pisum fulvum - not active Cicer arietinum - not active Vicia faba - not active Chenopodium album - not active Cirsium arvense - not active Sonchus arvensis - not active Cytotoxic activ…
74	Pyridomacrolidin	Beauveria bassiana EPF-5	Fungi / Ascomycota	C31H35NO10	581	10.7164/antibiotics.51.596	Antibacterial activity, 100 μg/ml by the paper disc Staphylococcus aureus - not active Micrococcus luteus - not active Bacillus subtilis - not active Mycobacterium smegmatis - not active Escherichia coli - not active Pseudomonas aeruginosa - not active Antifungal activity, 100 μg/ml by the paper disc Aspergillus niger - not active Pyricularia oryzae - not active Mucor racemosus - not active Candi…
75	Fusanolide A	Fusarium sp.	Fungi / Ascomycota	C10H14O2	166	10.1515/znb-2002-0216	Plant growth activity Pine pollen - no inhibitory effect on the germination at concentrations of 3 and 30 mg/L; completely inhibited the germination at a concentration of 300 mg/L Tea pollen - inhibited the pollen tube growth to 35% of control at a concentration of 30 mg/L and completely inhibited that at a concentration of 300 mg/L
76	Fusanolide B	Fusarium sp.	Fungi / Ascomycota	C10H14O4	198	10.1515/znb-2002-0216	Plant growth activity Pine pollen - no inhibitory effect on the germination at concentrations of 3, 30 and 300 mg/L Tea pollen - no inhibitory effect on the pollen tube growth at the concentration from 3 mg/L to 300 mg/L
77	(4S,7R,10R,E)-4,7-dihydroxy-10-methyl-3,4,7,8,9,10-hexahydro-2H-oxecin-2-one	Cordyceps militaris BCC 2816	Fungi / Ascomycota	C10H16O4	200	10.1021/np0401415	Antiparasitic activity Plasmodium falciparum K1 - not active at 20 µg/mL
78	(4S,5S,10R)-4-hydroxy-5-methoxy-10-methyloxecane-2,7-dione	Cordyceps militaris BCC 2816	Fungi / Ascomycota	C11H18O5	230	10.1021/np0401415	Antiparasitic activity Plasmodium falciparum K1 - not active at 20 µg/mL
79	(4S,5R,10R)-4-hydroxy-5-methoxy-10-methyloxecane-2,7-dione	Cordyceps militaris BCC 2816	Fungi / Ascomycota	C11H18O5	230	10.1021/np0401415	Antiparasitic activity Plasmodium falciparum K1 - not active at 20 µg/mL
80	Dictyosphaeric acid A	Penicillium sp. F01V25	Fungi / Ascomycota	C22H24O8	416	10.1021/np049973t	Antibacterial activity, 50 µg/well methicillin-sensitive Staphylococcus aureus - 11 mm methicillin-resistant Staphylococcus aureus - 12 mm vancomycin-resistant Enterococcus faecium - 7 mm Antifungal activity, 50 µg/well Candida albicans - 7 mm
81	Dictyosphaeric acid B	Penicillium sp. F01V25	Fungi / Ascomycota	C22H26O9	434	10.1021/np049973t	Antibacterial activity methicillin-sensitive Staphylococcus aureus - not active at 50 and 200 µg methicillin-resistant Staphylococcus aureus - not active at 50 and 200 µg vancomycin-resistant Enterococcus faecium - not active at 50 and 200 µg Antifungal activity Candida albicans - not active at 50 and 200 µg
82	7-O-acetylmultiplolide A (7α-acetoxymultiplolide A)	Pseudorhypophila mangenotii gen. et comb. nov. CBS 419.67 Phomopsis sp. YM 311483	Fungi / Ascomycota	C12H16O6	256	10.3390/jof7030181 10.1021/np070624j	Antibacterial activity Mycobacterium smegmatis - not active Bacillus subtilis - not active Staphylococcus aureus - not active Chromobacterium violaceum - not active Escherichia coli - not active Pseudomonas aeruginosa - not active Antifungal activity, MIC, µg/mL Candida albicans - not active Schizosaccharomyces pombe - not active Wickerhamomyces anomalus - not active Rhodotorula glutinis - not ac…
83	8-O-acetylmultiplolide A (8α-acetoxymultiplolide A)	Pseudorhypophila mangenotii gen. et comb. nov. CBS 419.67 Phomopsis sp. YM 311483 Phomopsis sp. NXZ-05	Fungi / Ascomycota	C12H16O6	256	10.3390/jof7030181 10.1021/np070624j 10.1002/hlca.200790190	Antibacterial activity Mycobacterium smegmatis - not active Bacillus subtilis - not active Staphylococcus aureus - not active Chromobacterium violaceum - not active Escherichia coli - not active Pseudomonas aeruginosa - not active Antifungal activity, MIC, µg/mL Candida albicans - not active Schizosaccharomyces pombe - not active Wickerhamomyces anomalus - not active Rhodotorula glutinis - not ac…
84	8α-acetoxy-5α-hydroxy-7-oxodecan-10-olide	Phomopsis sp. YM 311483	Fungi / Ascomycota	C12H18O6	258	10.1021/np070624j	Antifungal activity, MIC, µg/mL Aspergillus niger YM 3029 - 125 Botrytis cinerea YM 3061 - 250 Fusarium avenaceum YM 3065 - not active up to 500 µg/mL Fusarium moniliforme YM 3067 - not active up to 500 µg/mL Helminthosporium maydis YM 3076 - 500 Penicillium islandicum YM 3104 - 250 Ophiostoma minus YM3429 - not active up to 500 µg/mL
85	7α,8α-Dihydroxy-3,5-decadien-10-olide	Phomopsis sp. YM 311483	Fungi / Ascomycota	C10H14O4	198	10.1021/np070624j	Antifungal activity, MIC, µg/mL Aspergillus niger YM 3029 - 125 Botrytis cinerea YM 3061 - 500 Fusarium avenaceum YM 3065 - not active up to 500 µg/mL Fusarium moniliforme YM 3067 - not active up to 500 µg/mL Helminthosporium maydis YM 3076 - 500 Penicillium islandicum YM 3104 - not active up to 500 µg/mL Ophiostoma minus YM3429 - not active up to 500 µg/mL
86	8-O-Acetyl-5,6-dihydro-5,6-epoxy-multiplolide A	Phomopsis sp. NXZ-05	Fungi / Ascomycota	C12H16O7	272	10.1002/hlca.200790190	Antifungal activity Candida albicans - not active Cytotoxic activity human-tumor Raji cells - not active at 100 μg/mL Enzyme inhibitory activity, IC50, μg/mL acetylcholinesterase (AChE) - no distinct activity at 10 μg/mL
87	5,6-dihydro-5,6-epoxymultiplolide A	Phomopsis sp. NXZ-05	Fungi / Ascomycota	C10H14O6	230	10.1002/hlca.200790190	Antifungal activity Candida albicans - not active at 200 μg/mL Cytotoxic activity human-tumor Raji cells - not active at 100 μg/mL Enzyme inhibitory activity acetylcholinesterase (AChE) - no distinct activity at 10 μg/mL
88	3,4-deoxy-3,4-didehydromultiplolide A	Phomopsis sp. NXZ-05	Fungi / Ascomycota	C10H14O4	198	10.1002/hlca.200790190	Antifungal activity Candida albicans - not active at 200 μg/mL
89	Stagonolide A	Stagonospora cirsii C-163 Stagonospora cirsii S-47	Fungi / Ascomycota	C12H18O4	226	10.1021/jf070742c 10.1021/acs.jafc.9b04573 10.3390/jof7100829	Phytotoxic activity, (diameter/length of necrosis, mm), at 2 mg/mL (∼10 mM), 5 days post application Sonchus arvensis - 5.4 ± 1.8 Cirsium arvense - 8.1 ± 2.7 Elytrigia repens - 3.0 ± 1.4 Phytotoxic activity, (diameter/length of necrosis, mm), Droplets (10 µL) of toxin solution (5 × 10^-3 M) Canada thistle (Cirsium arvense) - 3.3 lettuce (Lactuca sativa) - 2.8 zinnia (Zinnia elegans) - 1.0 sow-thi…
90	Stagonolide B	Stagonospora cirsii C-163	Fungi / Ascomycota	C12H20O5	244	10.1021/np0703038	Phytotoxic activity, 1 mg/mL Cirsium arvense - not active Sonchus arvensis - not active Zootoxic/mycotoxic activity, 50 µg/mL Colpoda steinii - not active
91	Stagonolide C	Stagonospora cirsii C-163	Fungi / Ascomycota	C10H16O4	200	10.1021/np0703038	Phytotoxic activity, 1 mg/mL Cirsium arvense - not active Sonchus arvensis - not active Zootoxic/mycotoxic activity, 50 µg/mL Colpoda steinii - causing inhibition of movement in 50–60% of infusorium cells after 3 h exposure
92	Stagonolide D	Stagonospora cirsii C-163	Fungi / Ascomycota	C10H14O4	198	10.1021/np0703038	Phytotoxic activity, 1 mg/mL Cirsium arvense - not active Sonchus arvensis - not active Zootoxic/mycotoxic activity, 50 µg/mL Colpoda steinii - not active
93	Stagonolide E	Stagonospora cirsii C-163 Curvularia sp. PSU-F22	Fungi / Ascomycota	C10H14O3	182	10.1021/np0703038 10.1007/s12272-011-0502-8	Phytotoxic activity, 1 mg/mL Cirsium arvense - not active Sonchus arvensis - not active Zootoxic/mycotoxic activity, 50 µg/mL Colpoda steinii - not active Antibacterial activity Staphylococcus aureus ATCC 25923 - not active at 200 µg/mL methicillin-resistant S. aureus - not active at 200 µg/mL Antifungal activity Microsporum gypseum SH-MU-4 - not active at 200 µg/mL
94	Stagonolide F	Stagonospora cirsii C-163	Fungi / Ascomycota	C10H16O3	184	10.1021/np0703038	Phytotoxic activity, 1 mg/mL Cirsium arvense - not active Sonchus arvensis - not active Zootoxic/mycotoxic activity, 50 µg/mL Colpoda steinii - not active
95	Stagonolide I	Stagonospora cirsii C-163	Fungi / Ascomycota	C10H14O4	198	10.1021/np800415w	Phytotoxic activity, mm Cirsium arvense (Canada thistle) - 0.5 Plant growth inhibition chicory - not active at 1 mg/mL
96	Curvulide A	Curvularia sp. 768	Fungi / Ascomycota	C10H14O4	198	10.1021/np8003326	Not tested
97	Curvulide B1= Stagonolide H (or enantiomers)	Curvularia sp. 768 Roussoella siamensis SYSU‑MS4723	Fungi / Ascomycota	C10H12O4	196	10.1021/np8003326 10.1007/s42995-020-00066-8 10.1021/np800415w	Cytotoxic activity MCF-7 - not active at 50 μM HepG-2 - not active at 50 μM A549 - not active at 50 μM Anti‑inflammatory activity NO overproduction in LPS-stimulated RAW 264.7 - not active at 50 μM Antioxidant activity ABTS+ scavenging activity - not active Antibacterial activity Escherichia coli - not active at 50 µg/disk Bacillus megaterium - not active at 50 µg/disk Antifungal activity Mycotyp…	Greve et al., 2008 (10.1021/np8003326) described the absolute configuration of epimeric curvulides B1/B2 deduced from CD-spectra. The relative configuration of stagonolide H was published by Evidente et al., 2008 (10.1021/np800415w).
98	Curvulide B2	Curvularia sp. 768 Stagonospora cirsii C-163 Roussoella siamensis SYSU‑MS4723	Fungi / Ascomycota	C10H12O4	196	10.1021/np8003326 10.1021/np800415w 10.1007/s42995-020-00066-8	Cytotoxic activity MCF-7 - not active at 50 μM HepG-2 - not active at 50 μM A549 - not active at 50 μM Anti‑inflammatory activity NO overproduction in LPS-stimulated RAW 264.7 - not active at 50 μM Antioxidant activity ABTS+ scavenging activity - not active Antibacterial activity Escherichia coli - not active at 50 µg/disk Bacillus megaterium - not active at 50 µg/disk Antifungal activity Mycotyp…
99	(3Z,5S,6E,9S,10R)-8-chloro-5,9-dihydroxy-10-methyl-5,8,9,10-tetrahydro-2H-oxecin-2-one	Curvularia sp. 768 Roussoella siamensis SYSU‑MS4723	Fungi / Ascomycota	C10H13ClO4	232	10.1021/np8003326 10.1007/s42995-020-00066-8	Cytotoxic activity MCF-7 - not active at 50 μM HepG-2 - not active at 50 μM A549 - not active at 50 μM Anti‑infammatory activity NO overproduction in LPS-stimulated RAW 264.7 - not active at 50 μM Antioxidant activity ABTS+ scavenging activity, capacity - 0.32 Antibacterial activity Escherichia coli - not active at 50 µg/disk Bacillus megaterium - not active at 50 µg/disk Antifungal activity Myco…	A chlorine-containing TML, a possible artifact formed during extraction Curvularia sp. 768 with methylene chloride (Greve et al., 2008 10.1021/np8003326). However, its isolation from the ethyl acetate extract of Roussoella siamensis SYSU‑MS4723 (Chen et al., 2020 10.1007/s42995-020-00066-8) indicated the natural origin of this compound.
100	Botryolide A	Botryotrichum sp. (NRRL 38180) (Chaetomium piluliferum)	Fungi / Ascomycota	C10H14O5	214	10.1021/np070610d	Antibacterial activity Staphylococcus aureus (ATCC 25923) - not active at 100 µg/disk Bacillus subtilis (ATCC 6051) - not active at 100 µg/disk Antifungal activity Candida albicans (ATCC 14053) - not active at 100 µg/disk Aspergillus flavus (NRRL 6541) - not active at 100 µg/disk Fusarium verticillioides (NRRL 25457) - not active at 100 µg/disk
101	Botryolide B	Botryotrichum sp. (NRRL 38180) (Chaetomium piluliferum)	Fungi / Ascomycota	C10H14O4	198	10.1021/np070610d	Antibacterial activity Staphylococcus aureus (ATCC 25923) - not active at 100 µg/disk Bacillus subtilis (ATCC 6051) - not active at 100 µg/disk Antifungal activity Candida albicans (ATCC 14053) - not active at 100 µg/disk Aspergillus flavus (NRRL 6541) - not active at 100 µg/disk Fusarium verticillioides (NRRL 25457) - not active at 100 µg/disk
102	Botryolide C	Botryotrichum sp. (NRRL 38180) (Chaetomium piluliferum)	Fungi / Ascomycota	C13H16O6	268	10.1021/np070610d	Antibacterial activity Staphylococcus aureus (ATCC 25923) - not active at 100 µg/disk Bacillus subtilis (ATCC 6051) - not active at 100 µg/disk Antifungal activity Candida albicans (ATCC 14053) - not active at 100 µg/disk
103	Botryolide D	Botryotrichum sp. (NRRL 38180) (Chaetomium piluliferum)	Fungi / Ascomycota	C10H16O5	216	10.1021/np070610d	Antibacterial activity Staphylococcus aureus (ATCC 25923) - not active at 100 µg/disk Bacillus subtilis (ATCC 6051) - not active at 100 µg/disk Antifungal activity Candida albicans (ATCC 14053) - not active at 100 µg/disk Aspergillus flavus (NRRL 6541) - not active at 100 µg/disk Fusarium verticillioides (NRRL 25457) - not active at 100 µg/disk
104	Phomolide A	Phomopsis sp. hzla01-1	Fungi / Ascomycota	C12H16O3	208	10.1038/ja.2008.37	Antibacterial activity, MIC, μg/mL Escherichia coli CMCC44103 - 5-10 Antifungal activity, MIC, μg/mL Candida albicans AS2538 - 5-10 Saccharomyces cerevisiae ATCC9763 - 5-10 Cytotoxic activity HeLa - not active at 10 μg/mL
105	Phomolide B	Phomopsis sp. hzla01-1	Fungi / Ascomycota	C12H18O4	226	10.1038/ja.2008.37	Antibacterial activity, MIC, μg/mL Escherichia coli CMCC44103 - 5-10 Antifungal activity, MIC, μg/mL Candida albicans AS2538 - 5-10 Saccharomyces cerevisiae ATCC9763 - 5-10 Cytotoxic activity HeLa - not active at 10 μg/mL
106	Phomolide C	Diaporthe sp. Phomopsis sp. B27	Fungi / Ascomycota	C18H30O6	342	10.1080/09168451.2015.1015953 10.1016/S1875-5364(09)60032-7	Antiproliferation assay COLO 201 - inhibited at 50 μg/mL Antifungal activity Cochliobolus miyabeanus - not active Candida albicans AS2.538 - not active at 50 μg/disc Cytotoxic activity HepG2 - not active at 10 μg/mL HeLa - not active at 10 μg/mL Antibacterial activity Bacillus subtilis CMCC63501 - not active at 50 μg/disc Escherichia coli CMCC44103 - not active at 50 μg/disc Staphylococcus aureus…
107	Z-4,6,9-Trihydroxy-10-nonyl-3,4,5,6,9,10-hexahydrooxecin-2-one	Tubercularia sp. TF5	Fungi / Ascomycota	C18H32O5	328	10.1007/s10600-010-9505-9	Antibacterial activity Escherichia coli - not active at 50 μg/mL Bacillus subtilis - not active at 50 μg/mL Staphylococcus aureus - not active at 50 μg/mL Antifungal activity Saccharomyces cerevisiae - not active at 50 μg/mL Candida albicaus - not active at 50 μg/mL Cytotoxic activity, inhibiting rate [%] HeLa - 10 μg/mL - 27.6%, 20 μg/mL - 40.7%
108	3R,5R-Sonnerlactone	Endophytic fungus strain Zh6-B1 Chaetosphaeronema hispidulum TS-8-1	Fungi / Ascomycota	C14H18O5	266	10.1016/j.bmcl.2010.04.036 10.1038/s41429-020-0297-2	Antiproliferative activity, at 100 µM [%] multi-drug resistant human oral floor carcinoma cells (KV/MDR) - 42.4 %
109	3R,5S-Sonnerlactone	Endophytic fungus strain Zh6-B1 Chaetosphaeronema hispidulum TS-8-1	Fungi / Ascomycota	C14H18O5	266	10.1016/j.bmcl.2010.04.036 10.1038/s41429-020-0297-2	Antiproliferative activity, at 100 µM [%] multi-drug resistant human oral floor carcinoma cells (KV/MDR) - 41.6 % Cytotoxic activity, IC50 HepG2 - 107.69 µM
110	Curvulalide	Curvularia sp. PSU-F22	Fungi / Ascomycota	C10H14O5	214	10.1007/s12272-011-0502-8	Antibacterial activity Staphylococcus aureus ATCC 25923 (SA) - not active at 200 µg/mL Staphylococcus aureus (MRSA) SK1 - not active at 200 µg/mL Antifungal activity Microsporum gypseum (MG) SHMU-4 - not active at 200 µg/mL
111	Truncatenolide	Colletotrichum truncatum 17-5-5	Fungi / Ascomycota	C10H16O3	184	10.1021/acs.jafc.2c02502	Antifungal activity, 2.5 mM Colletotrichum nicotianae - 40% inhibition Macrophomina phaseolina - 100% inhibition Phytotoxic activity, 2.5 mM Soybean seedlings - reduced the roots length by 43%
112	Modiolide D	Microsphaeropsis arundinis Paraconiothyrium sp. VK-13	Fungi / Ascomycota	C12H16O5	240	10.1038/s41429-018-0073-8 10.21577/0103-5053.20190189	Anti-inflammatory activity NO overproduction in LPS-stimulated RAW264.7 - not active at 20 µM Cytotoxic activity, IC50, µg/mL LM3 - 76.84 ± 13.43 LP07 - > 125 MCF-7 - 70.22 ± 3.47
113	Modiolide E	Microsphaeropsis arundinis Paraconiothyrium sp. VK-13	Fungi / Ascomycota	C12H16O5	240	10.1038/s41429-018-0073-8 10.21577/0103-5053.20190189	Anti-inflammatory activity NO overproduction in LPS-stimulated RAW 264.7 - not active at 20 µM Cytotoxic activity, IC50, µg/mL LM3 - 66.69 ± 2.63 LP07 - > 125 MCF-7 - 88.05 ± 3.61
114	Modiolide F	Paraconiothyrium sp. VK-13	Fungi / Ascomycota	C12H16O5	240	10.1038/s41429-018-0073-8	Anti-inflammatory activity NO overproduction in LPS-stimulated RAW 264.7 - not active at 20 µM
115	Modiolide G	Paraconiothyrium sp. VK-13	Fungi / Ascomycota	C10H14O4	198	10.1038/s41429-018-0073-8	Anti-inflammatory activity NO overproduction in LPS-stimulated RAW 264.7 - not active at 20 µM
116	Decarestrictine Q	Pseudopestalotiopsis sp. PSU-AMF45	Fungi / Ascomycota	C10H14O5	214	10.1016/j.tet.2019.130530	Not tested
117	Cremenolide	Trichoderma cremeum 506	Fungi / Ascomycota	C16H22O7	326	10.1080/14786419.2015.1131985	Antifungal activity F. oxysporum - at 100 μg/plug (11% of inhibition) B. cinerea - at 100 μg/plug (9% of inhibition) R. solani - at 10 μg/plug (15% of inhibition) Plant growth promotion Increased root length and fresh weight of tomato seedlings at 10 and 1 ppm (no effect at 0.1 and 0.01 ppm).
118	Aspinolide D	Trichoderma arundinaceum IBT 40837	Fungi / Ascomycota	C14H20O5	268	10.1111/1462-2920.12514	Not tested
119	Aspinolide E	Trichoderma arundinaceum IBT 40837	Fungi / Ascomycota	C14H22O6	286	10.1111/1462-2920.12514	Not tested
120	Aspinolide F	Trichoderma arundinaceum IBT 40837	Fungi / Ascomycota	C16H22O8	342	10.1111/1462-2920.12514	Not tested
121	Aspinolide G	Trichoderma arundinaceum IBT 40837	Fungi / Ascomycota	C15H22O7	314	10.1111/1462-2920.12514	Not tested
122	Diaporthsin A	Diaporthe sp. JC-J7	Fungi / Ascomycota	C10H16O3	184	10.1039/C8RA08822E	Antihyperlipidemic activity did not show lipid-lowering effects on triglycerides in steatotic L02 cells at a concentration of 5 μg/mL Cytotoxic activity, IC50 A549 - >100 mM
123	Diaporthsin F	Diaporthe sp. JC-J7	Fungi / Ascomycota	C13H20O6	272	10.1039/C8RA08822E	Antihyperlipidemic activity did not show lipid-lowering effects on triglycerides in steatotic L02 cells at a concentration of 5 μg/mL Cytotoxic activity, IC50 A549 - >100 mM
124	Diaporthsin H	Diaporthe sp. JC-J7	Fungi / Ascomycota	C10H16O5	216	10.1039/C8RA08822E	Antihyperlipidemic activity did not show lipid-lowering effects on triglycerides in steatotic L02 cells at a concentration of 5 μg/mL Cytotoxic activity, IC50 A549 - >100 mM
125	Mantidactolide A	Mantidactylus femoralis	Animalia / Amphibia	C11H20O2	184	10.1021/np400131q	Not tested
126	Mantidactolide B	Mantidactylus femoralis	Animalia / Amphibia	C11H20O2	184	10.1021/np400131q	Not tested
127	Luteolide	Gephyromantis luteus Mantidactylus betsileanus Gephyromantis moseri	Animalia / Amphibia	C13H24O2	212	10.1021/acs.orglett.9b00852 10.1039/C7OB00849J	Not tested	The compound C in G. moseri (Peram et al., 2017 10.1039/C7OB00849J) was later identified as luteolide in Melnik et al., 2019 (10.1021/acs.orglett.9b00852)
128	Stagonolide J	Stagonospora cirsii S-47	Fungi / Ascomycota	C12H20O4	228	10.1021/acs.jafc.9b04573 10.3390/jof7100829	Phytotoxic activity, (diameter/length of necrosis, mm), at 2 mg/mL (∼10 mM), 5 days post application Sonchus arvensis - 2.4 ± 2.3 Cirsium arvense - 6.4 ± 1.3 Elytrigia repens - 0.9 ± 1.5 Antialgal activity Haematococcus lacustris - not active at 100 μg/mL Antibacterial activity, 100 μg/disc B. subtilis - not active Antifungal activity, 100 μg/disc C. tropicalis - not active Insecticidal activity,…
129	Stagonolide K	Stagonospora cirsii S-47	Fungi / Ascomycota	C12H20O3	212	10.1021/acs.jafc.9b04573 10.3390/jof7100829	Herbicidal activity (10.3390/plants9111621) wheat couch-grass celery Sosnowsky's hogweed goutweed chickpea soybean poa rapeseed radish tomato aztec tobacco cucumber French marigold Canada thistle wormwood dandelion perennial sowthistle Phytotoxic activity, (diameter/length of necrosis, mm), at 2 mg/mL (∼10 mM), 5 days post apllication Sonchus arvensis - 3.3 ± 2.0 Cirsium arvense - 5.9 ± 1.7 Elytr…
130	Pinolide	Didymella pinodes CO-99	Fungi / Ascomycota	C12H20O5	244	10.1021/jf300824d	Phytotoxic activity, mm, at 1 mg/mL Lupinus albus - not active Medicago truncatula - not active Pisum sativum - not active Lens culinaris - not active Lathyrus sativus - not active Phaseolus vulgaris - not active Pisum fulvum - not active Cicer arietinum - not active Vicia faba - not active Chenopodium album - not active Cirsium arvense - not active Sonchus arvensis - not active
131	(6S,7R,9R)-6,7-dihydroxy-9-propylnon-4-eno-9-lactone	Phomopsis sp. HCCB03520	Fungi / Ascomycota	C12H20O4	228	10.1002/cbdv.201100080	Plant growth inhibition Germination inhibition, [%] Medicago sativa - 10 μg/ml 48.3 ± 1.9, 50 μg/ml 82.5 ± 1.7, 100 μg/ml 99.2 ± 1.7 Trifolium hybridum - 10 μg/ml 19.2 ± 3.2, 50 μg/ml 76.7 ± 2.7, 100 μg/ml 99.3 ± 1.9 Buchloe dactyloides - 10 μg/ml 40.0 ± 2.7, 50 μg/ml 62.5 ± 3.2, 100 μg/ml 86.7 ± 2.7 Radicle growth inhibition, [%] Medicago sativa - 10 μg/ml 16.4 ± 1.6, 50 μg/ml 65.4 ± 1.4, 100 μg…
132	Phomolide D	Phomopsis sp. A123	Fungi / Ascomycota	C12H20O5	244	10.1080/21501203.2010.529583	Antibacterial activity Escherichia coli (CMCC (B) 44103) - not active at 30 μg/plate Bacillus subtilis (CMCC (B) 63501) - not active at 30 μg/plate Bacillus pumilus (CMCC (B) 63202) - not active at 30 μg/plate Staphylococcus aureus (CMCC (B) 26003) - not active at 30 μg/plate Antifungal activity Candida albicans (AS 2.538) - not active at 30 μg/plate
133	Phomolide E	Phomopsis sp. A123	Fungi / Ascomycota	C12H18O5	242	10.1080/21501203.2010.529583	Antibacterial activity Escherichia coli (CMCC (B) 44103) - not active at 30 μg/plate Bacillus subtilis (CMCC (B) 63501) - not active at 30 μg/plate Bacillus pumilus (CMCC (B) 63202) - not active at 30 μg/plate Staphylococcus aureus (CMCC (B) 26003) - not active at 30 μg/plate Antifungal activity Candida albicans (AS 2.538) - not active at 30 μg/plate
134	Phomolide F	Phomopsis sp. A123	Fungi / Ascomycota	C12H18O5	242	10.1080/21501203.2010.529583	Antibacterial activity Escherichia coli (CMCC (B) 44103) - not active at 30 μg/plate Bacillus subtilis (CMCC (B) 63501) - not active at 30 μg/plate Bacillus pumilus (CMCC (B) 63202) - not active at 30 μg/plate Staphylococcus aureus (CMCC (B) 26003) - not active at 30 μg/plate Antifungal activity Candida albicans (AS 2.538) - not active at 30 μg/plate
135	Phomolide G	Phomopsis sp. A123	Fungi / Ascomycota	C12H20O5	244	10.1080/21501203.2010.529583	Antibacterial activity Escherichia coli (CMCC (B) 44103) - not active at 30 μg/plate Bacillus subtilis (CMCC (B) 63501) - not active at 30 μg/plate Bacillus pumilus (CMCC (B) 63202) - not active at 30 μg/plate Staphylococcus aureus (CMCC (B) 26003) - not active at 30 μg/plate Antifungal activity Candida albicans (AS 2.538) - not active at 30 μg/plate
136	Phomolide H	Phomopsis sp. A123	Fungi / Ascomycota	C13H22O5	258	10.1080/21501203.2010.529583	Antibacterial activity Escherichia coli (CMCC (B) 44103) - not active at 30 μg/plate Bacillus subtilis (CMCC (B) 63501) - not active at 30 μg/plate Bacillus pumilus (CMCC (B) 63202) - not active at 30 μg/plate Staphylococcus aureus (CMCC (B) 26003) - not active at 30 μg/plate Antifungal activity Candida albicans (AS 2.538) - not active at 30 μg/plate
137	Bellidisin B	Phoma bellidis HGX2	Fungi / Ascomycota	C20H28O7	380	10.1016/j.phytol.2018.11.012	Cytotoxic activity, IC50, μM HL-60 - not active A549 - not active SMMC-7721 - not active MCF-7 - not active SW480 - not active
138	Bellidisin D	Phoma bellidis HGX2	Fungi / Ascomycota	C18H26O7	354	10.1016/j.phytol.2018.11.012	Cytotoxic activity, IC50, μM ± SD HL-60 - 3.40 ± 0.26 A549 - 14.80 ± 0.44 SMMC-7721 - 11.39 ± 1.18 MCF-7 - 15.25 ± 0.07 SW480 - 8.55 ± 0.21
139	Xylarolide	Xylaria sp. 101	Fungi / Ascomycota	C12H18O4	226	10.1177/1934578X1100601214	Cytotoxic activity, IC50± SD, μM MIA-PA-CA-2 - 32 ± 0.76 MCF-7 - 29 ± 0.82 PC-3 - 18 ± 1.52 Antioxidant activity DPPH scavenging activity - not active Antibacterial activity Staphylococcus aureus ATCC 25923 - not active up to 62.5 µM Pseudomonas aeruginosa ATCC 27853 - not active up to 62.5 µM Escherichia coli ATCC 25922 - not active up to 62.5 µM Antifungal activity Candida albicans AS 2.538 - n…
140	Xylarolide A	Diaporthe sp. LG23	Fungi / Ascomycota	C22H28O7	404	10.1016/j.bmcl.2018.04.018	Cytotoxic activity, IC50± SD, μM MIA-PA-CA-2 - 20 ± 0.17 MCF-7 - 30 ± 1.02 PC-3 - 14 ± 0.12 Antioxidant activity DPPH scavenging activity, EC50, μM - 27.5 Antibacterial activity Staphylococcus aureus ATCC 25923 - not active up to 62.5 µM Pseudomonas aeruginosa ATCC 27853 - not active up to 62.5 µM Escherichia coli ATCC 25922 - not active up to 62.5 µM
141	Xylarolide B	Diaporthe sp. LG23	Fungi / Ascomycota	C13H20O4	240	10.1016/j.bmcl.2018.04.018	Cytotoxic activity, IC50± SD, μM MIA-PA-CA-2 - 34 ± 1.32 MCF-7 - >50 PC-3 - 22 ± 0.83 Antioxidant activity DPPH scavenging activity - not active Antibacterial activity Staphylococcus aureus ATCC 25923 - not active up to 62.5 µM Pseudomonas aeruginosa ATCC 27853 - not active up to 62.5 µM Escherichia coli ATCC 25922 - not active up to 62.5 µM
142	Stomopneulactone A	Stomopneustes variolaris	Animalia / Echinoidea	C16H26O5	298	10.1016/j.bioorg.2020.104140	Anti-inflammatory activity, IC50, mM COX-1 inhibition activity - 2.35 ± 0.03 COX-2 inhibition activity - 2.20 ± 0.04 Selectivity index - 1.06 ± 0.03 5-LOX inhibition activity - 2.91 ± 0.01 Antioxidant activity, IC50, mM DPPH scavenging activity - 1.72 ± 0.02 ABTS+ scavenging activity - 1.80 ± 0.03
143	Stomopneulactone B	Stomopneustes variolaris	Animalia / Echinoidea	C16H26O4	282	10.1016/j.bioorg.2020.104140	Antifungal activity, MIC, µM Pythium ultimum - 425
144	Cytospolide A	Cytospora sp. ZW02	Fungi / Ascomycota	C17H28O5	312	10.1002/ejoc.201100675	Cytotoxic activity, IC50, μg/mL A549 - >50	C-2 methyl group in lactone core
145	Cytospolide B	Cytospora sp. ZW02	Fungi / Ascomycota	C17H28O5	312	10.1002/ejoc.201100675	Cytotoxic activity, IC50, μg/mL A549 - 5.15	C-2 methyl group in lactone core
146	Cytospolide C	Cytospora sp. ZW02	Fungi / Ascomycota	C19H30O6	354	10.1002/ejoc.201100675	Cytotoxic activity, IC50, μg/mL A549 - >50	C-2 methyl group in lactone core
147	Cytospolide D	Cytospora sp. ZW02	Fungi / Ascomycota	C15H26O4	270	10.1002/ejoc.201100675	Cytotoxic activity, IC50, μg/mL A549 - >50	C-2 methyl group in lactone core
148	Cytospolide E	Cytospora sp. ZW02	Fungi / Ascomycota	C15H26O4	270	10.1002/ejoc.201100675	Cytotoxic activity, IC50, μg/mL A549 - 7.09	C-2 methyl group in lactone core
149	Cytospolide F	Cytospora sp. ZW02	Fungi / Ascomycota	C15H26O5	286	10.1021/jo201755v	Cytotoxic activity, IC50, μg/mL A549 - >50 HCT116 - >50 QGY - >50 A375 - >50 U937 - >50	C-2 methyl group in lactone core
150	Cytospolide G	Cytospora sp. ZW02	Fungi / Ascomycota	C17H28O6	328	10.1021/jo201755v	Cytotoxic activity, IC50, μg/mL A549 - >50 HCT116 - >50 QGY - >50 A375 - >50 U937 - >50	C-2 methyl group in lactone core
151	Cytospolide H	Cytospora sp. ZW02	Fungi / Ascomycota	C19H30O7	370	10.1021/jo201755v	Cytotoxic activity, IC50, μg/mL A549 - >50 HCT116 - >50 QGY - >50 A375 - >50 U937 - >50	C-2 methyl group in lactone core
152	Cytospolide I	Cytospora sp. ZW02	Fungi / Ascomycota	C17H28O6	328	10.1021/jo201755v	Cytotoxic activity, IC50, μg/mL A549 - >50 HCT116 - >50 QGY - >50 A375 - >50 U937 - >50	C-2 methyl group in lactone core
153	Cytospolide J	Cytospora sp. ZW02	Fungi / Ascomycota	C17H28O6	328	10.1021/jo201755v	Cytotoxic activity, IC50, μg/mL A549 - >50 HCT116 - >50 QGY - >50 A375 - >50 U937 - >50	C-2 methyl group in lactone core
154	Cytospolide K	Cytospora sp. ZW02	Fungi / Ascomycota	C15H26O4	270	10.1021/jo201755v	Cytotoxic activity, IC50, μg/mL A549 - 20.47 HCT116 - >50 QGY - >50 A375 - >50 U937 - >50	C-2 methyl group in lactone core
155	Cytospolide L	Cytospora sp. ZW02	Fungi / Ascomycota	C17H28O5	312	10.1021/jo201755v	Cytotoxic activity, IC50, μg/mL A549 - >50 HCT116 - >50 QGY - >50 A375 - >50 U937 - >50	C-2 methyl group in lactone core
156	Cytospolide M	Cytospora sp. ZW02	Fungi / Ascomycota	C15H26O5	286	10.1021/jo201755v	Cytotoxic activity,IC50, μg/mL A549 - 12.29 HCT116 - >50 QGY - >50 A375 - >50 U937 - >50	C-2 methyl group in lactone core
157	Cytospolide N	Cytospora sp. ZW02	Fungi / Ascomycota	C17H28O7	344	10.1021/jo201755v	Cytotoxic activity, IC50, μg/mL A549 - 16.55 HCT116 - >50 QGY - >50 A375 - >50 U937 - >50	C-2 methyl group in lactone core
158	Cytospolide O	Cytospora sp. ZW02	Fungi / Ascomycota	C15H24O4	268	10.1021/jo201755v	Cytotoxic activity, IC50, μg/mL A549 - 39.17 HCT116 - >50 QGY - >50 A375 - >50 U937 - >50	C-2 methyl group in lactone core
159	Cytospolide P	Cytospora sp. ZW02	Fungi / Ascomycota	C17H28O6	328	10.1021/jo201755v	Cytotoxic activity, IC50, μg/mL A549 - 2.05 HCT116 - >50 QGY - 15.82 A375 - >50 U937 - 28.26	C-2 methyl group in lactone core
160	Bellidisin C	Phoma bellidis HGX2	Fungi / Ascomycota	C20H30O6	366	10.1016/j.phytol.2018.11.012	Cytotoxic activity, IC50, μM HL-60 - not active A549 - not active SMMC-7721 - not active MCF-7 - not active SW480 - not active
161	Diaportheolide A	Diaporthe sp. SXZ-19	Fungi / Ascomycota	C14H24O5	272	10.1002/cbdv.202001055	Antibacterial activity Staphylococcus aureus ATCC 292 - 10 μg/disc, MIC>128 μg/mL
162	Penicillinolide A	Penicillium sp. SF-5292	Fungi / Ascomycota	C14H24O5	272	10.3390/md11114510 https://patents.google.com/patent/KR20150134491A/en	Anti-inflammatory activity, murine peritoneal macrophages stimulated with LPS, decreasing of inflammatory mediators (IC50, μM): Interleukin-1β (IL-1β) - 8.63 Tumor necrosis factor-α (TNF-α) - 11.32 Interleukin-6 (IL-6) - 20.92 NO - 20.47 Prostaglandin E2 (PGE2) - 17.54 decrease in inducible nitric oxide synthase (iNOS) expression at 20 μM decrease in pro-inflammatory cyclooxygenase (COX-2) expres…
163	Phomol	Phomopsis sp. E02018	Fungi / Ascomycota	C22H36O7	412	10.7164/antibiotics.57.559	Anti-inflammatory activity (12-O-tetradecanoylphorbol-13-acetate (TPA) induced mouse ear edema) - 1 mg/ear Cytotoxic activity L1210 - beetween 20 μg/mL Colo-320 - beetween 50 μg/mL MDA MB-231 - beetween 50 μg/mL Antibacterial activity, MIC, μg/mL Arthrobacter citreus - 20 bactericidal Bacillus brevis - >100 Bacillus subtilis- >100 Corynebacterium insidiosum - 10 bacteriostatic Micrococcus luteus …
164	(5Z,9S)-tetradec-5-en-9-olide	Silvestritermes minutus	Animalia / Insecta	C14H24O2	224	10.1021/acs.jnatprod.8b00632	did not affect the behavior of other termite colony members in electrophysiological experiments as well as in electroantennographic and behavioral assays
165	Xyolide	Xylaria feejeensis MG871188	Fungi / Ascomycota	C20H32O8	400	10.1016/j.tetlet.2013.05.093	Antifungal activity, MIC, µM Pythium ultimum - 425
166	Hypocreolide A	Hypocrea lactea IBWF 02002	Fungi / Ascomycota	C16H28O3	268	10.1039/c001794a	Antibacterial activity (MIC, μg/mL) Bacillus brevis - 50 B. subtilis - 50 Escherichia coli K12 - 50 Enterobacter dissolvens - 50 Micrococcus luteus - 50 Proteus vulgaris - 50 Pseudomonas fluorescens - 50 Staphylococcus aureus - 50 Antifungal activity (MIC, µg/mL) Candida albicans - 50 Nematospora coryli - 15 Magnaporthe grisea - 25 Mucor miehei - 25 Paecilomyces variotii - 50 Penicillium notatum …
167	Mangiferaelactone	Pestalotiopsis mangiferae	Fungi / Ascomycota	C20H32O8	400	10.1016/j.tetlet.2014.03.012	Antibacterial activity, agar diffusion assay Bacillus cereus - 4.5 mm Enterococcus cloacae - 3.75 mm Enterococcus faecalis - 6.5 mm Listeria monocytogenes - 2.5 mm Proteus mirabilis - 1.5 mm Antibacterial activity, MIC, μg/mL Bacillus cereus - 552.9 Listeria monocytogenes - 1686.3 Antiparasitic activity Plasmodium falciparum - not active Trypanosoma cruzi - not active Cytotoxic activity A2058 - n…
168	Achaetolide-II	Helminthosporium velutinum TS28	Fungi / Ascomycota	C21H36O7	400	10.1016/j.tet.2015.08.013	Antifungal activity, IC50, µg/mL Cochliobolus miyabeanus > 100 Cytotoxic activity, IC50, µg/mL COLO 201 - 370 Phytotoxic activity inhibited root growth of Lactuca sativa at 500 µg/mL.
169	(5S,8S,9S,10R,E)-10-heptyl-5,8,9-trihydroxy-3,4,5,8,9,10-hexahydro-2H-oxecin-2-one	Xylaria feejeensis MG871188	Fungi / Ascomycota	C16H28O5	300	10.1002/cbdv.201800358	Osteoclastogenesis inhibitory activity differentiation at 0.5 and 1 μM
170	Diaportheolide B	Diaporthe sp. SXZ-19	Fungi / Ascomycota	C17H31O6	330	10.1002/cbdv.202001055	Antibacterial activity Staphylococcus aureus ATCC 292 - 10 μg/disc, MIC>128 μg/mL
171	Seimatopolide A	Seimatosporium discosioides KACC 42490	Fungi / Ascomycota	C18H32O5	328	10.1021/np200955z	Reporter gene assay, EC50, μM PPAR-α - n/a at 20 μM PPAR-β - n/a at 20 μM PPAR-γ - 1.15
172	Seimatopolide B	Seimatosporium discosioides KACC 42490	Fungi / Ascomycota	C18H32O4	312	10.1021/np200955z	Reporter gene assay, EC50, μM PPAR-α - n/a at 20 μM PPAR-β - n/a at 20 μM PPAR-γ - 11.05
173	Colletotriolide	Colletotrichum sp.	Fungi / Ascomycota	C18H32O5	328	https://studylib.net/doc/12954187/colletotrichum-sp.-a-new-macrolide-isolated-from-the-endo...	Cytotoxic activity A549 - not active HT29- not active HCT116 - not active Antibacterial activity, IC50 μg/mL E. coli - 500
174	Hispidulactone A	Chaetosphaeronema hispidulum TS-8-1	Fungi / Ascomycota	C15H20O4	264	10.1021/acs.jafc.8b02648	Cytotoxic activity, IC50 (μM) HCT116 - not active Hela - not active MCF7 - not active
175	Hispidulactone B	Chaetosphaeronema hispidulum TS-8-1	Fungi / Ascomycota	C14H18O5	266	10.1021/acs.jafc.8b02648 10.1038/s41429-020-0297-2	Not tested
176	Hispidulactone C	Chaetosphaeronema hispidulum TS-8-1	Fungi / Ascomycota	C15H20O5	280	10.1021/acs.jafc.8b02648	Not tested
177	Hispidulactone F	Chaetosphaeronema hispidulum TS-8-1	Fungi / Ascomycota	C15H20O5	280	10.1038/s41429-020-0297-2	Cytotoxic activity, IC50, µM HepG2 - 61.05
178	(R)-2,4-Dihydroxy-7-methyl-7,8,9,10,11,12-hexahydro-6-oxa-benzocyclodecen-5-one	Chaetosphaeronema hispidulur TS-8-1	Fungi / Ascomycota	C14H18O4	250	10.1021/acs.jafc.8b02648	Plant growth inhibition Seedling growth assay, IC50, μg/mL Arabidopsis thaliana - 8-16 Digitaria sanguinalis - <8 Echinochloa crus-galli - 8-16 Cytotoxic activity, IC50, μM HCT116 - 54.86 ± 1.52 Hela - 4.90 ± 0.02 MCF7 - 20.04 ± 4.00
179	Podospin A	Podospora sp. G214	Fungi / Ascomycota	C18H22O6	334	10.1021/acs.jnatprod.0c01344	Immunosuppressive Effects IC50 (μM) ± SD ConA-induced T cell proliferation - 10.6 ± 1.2 LPS-induced B cell proliferation - 10.3 ± 1.2 Cytotoxic activity, Cell viability at 50 μM (%) murine splenocytes - 86.5 ± 1.2 Apoptosis Assay (Apoptosis rate) Induces apoptosis in activated T cells through the JNK-mediated mitochondrial pathway. 5 μM - 40% 10 μM - 50% 20 μM - 65%
180	Podospin B	Podospora sp. G214	Fungi / Ascomycota	C18H24O6	336	10.1021/acs.jnatprod.0c01344	Immunosuppressive activity, IC50±SD, μM ConA-induced T cell proliferation - >50 LPS-induced B cell proliferation - >50 Cytotoxic activity, Cell viability at 50 μM (%) murine splenocytes - 94.7 ± 0.3
181	Podospin C	Podospora sp. G214	Fungi / Ascomycota	C16H22O5	294	10.1021/acs.jnatprod.0c01344	Immunosuppressive activity, IC50±SD, μM ConA-induced T cell proliferation - >50 LPS-induced B cell proliferation - >50 Cytotoxic activity, Cell viability at 50 μM (%) murine splenocytes - 91.1 ± 1.7
182	Sumalactone A	Penicillium sumatrense MCCC 3A00612	Fungi / Ascomycota	C16H20O6	308	10.1039/C7RA06933B	Anti‑infammatory activity NO production bioassay RAW 264.7 - not active
183	Sumalactone B	Penicillium sumatrense MCCC 3A00612	Fungi / Ascomycota	C16H20O6	308	10.1039/C7RA06933B	Anti‑infammatory activity NO production bioassay RAW 264.7 - not active
184	Aldaulactone	Alternaria dauci	Fungi / Ascomycota	C15H17O6	292	10.3389/fpls.2018.00502 10.1038/s41598-022-11896-0	Cytotoxic activity Carrot cell suspension, genotype H1 - decreased the cell viability (−30.5%) at concentrations 12.5 and 50 µg/mL Phytotoxic activity visible necrotic lesions on tobacco leaves after infiltration using 50 µg/mL solution
185	Xestodecalactone D	Corynespora cassiicola	Fungi / Ascomycota	C15H18O7	310	10.1002/ejoc.201200245	Cytotoxic activity L5178Y - not active Antibacterial activity Staphylococcus aureus - not active Streptococcus pneumoniae - not active Enterococcus faecium - not active Enterococcus cloacae - not active Antifungal activity Aspergillus fumigatus - not active Aspergillus faecalis - not active Candida albicans - not active Candida krusei - not active
186	Xestodecalactone E	Corynespora cassiicola	Fungi / Ascomycota	C19H26O7	366	10.1002/ejoc.201200245	Cytotoxic activity L5178Y - not active Antibacterial activity Staphylococcus aureus - not active Streptococcus pneumoniae - not active Enterococcus faecium - not active Enterococcus cloacae - not active Antifungal activity Aspergillus fumigatus - not active Aspergillus faecalis - not active Candida albicans - not active Candida krusei - not active
187	Xestodecalactone F	Corynespora cassiicola	Fungi / Ascomycota	C19H26O6	350	10.1002/ejoc.201200245	Cytotoxic activity L5178Y - not active Antibacterial activity Staphylococcus aureus - not active Streptococcus pneumoniae - not active Enterococcus faecium - not active Enterococcus cloacae - not active Antifungal activity Aspergillus fumigatus - not active Aspergillus faecalis - not active Candida albicans - not active Candida krusei - not active
188	Saccharothriolide A	Saccharothrix sp. A1506	Bacteria / Actinomycetia	C26H31NO8	485	10.1039/C5CC01953B	Cytotoxic activity HT1080 - not active at 100 μM HeLa - not active at 100 μM Antibacterial activity Staphylococcus aureus - not active at 50 μg/disc
189	Saccharothriolide B	Saccharothrix sp. A1506	Bacteria / Actinomycetia	C25H31NO7	457	10.1039/C5CC01953B	Cytotoxic activity, IC50, μM HT1080 - 13.9 HeLa - 17.9 Antifungal activity, IC50, μM Schizosaccharomyces pombe JY1 wild type - 5.9 Antibacterial activity Staphylococcus aureus - weak antibacterial activity at 50 μg/disc
190	Saccharothriolide C1	Saccharothrix sp. A1506	Bacteria / Actinomycetia	C19H26O7	366	10.1039/C5CC01953B	Cytotoxic activity HT1080 - not active at 100 μM HeLa - not active at 100 μM Antibacterial activity Staphylococcus aureus - not active at 50 μg/disc
191	Saccharothriolide D	Saccharothrix sp. A1506	Bacteria / Actinomycetia	C26H31NO8	485	10.1021/acs.jnatprod.6b00372	Cytotoxic activity HT1080 - not active at 100 μM
192	Saccharothriolide E	Saccharothrix sp. A1506	Bacteria / Actinomycetia	C25H31NO7	457	10.1021/acs.jnatprod.6b00372	Cytotoxic activity, IC50, μM HT1080 - 29.2
193	Saccharothriolide F	Saccharothrix sp. A1506	Bacteria / Actinomycetia	C25H29NO8	471	10.1021/acs.jnatprod.6b00372	Cytotoxic activity, IC50, μM HT1080 - 66.4
194	Presaccharothriolide X	Saccharothrix sp. A1506	Bacteria / Actinomycetia	C19H24O6	348	10.1021/acs.orglett.8b01535	Cytotoxic activity, IC50, μM HT1080 - 12.3 Antifungal activity, IC50, μM Schizosaccharomyces pombe JY1 wild type - 89.2
195	Saccharothriolide C2	Saccharothrix sp. A1506 with Tsukamurella pulmonis TP-B0596	Bacteria / Actinomycetia	C19H26O7	366	10.1016/j.tetlet.2019.03.034	Cytotoxic activity HT1080 - not active at 100 μM
196	Neo-debromoaplysiatoxin C	Lyngbya sp.	Bacteria / Cyanophyceae	C32H44O9	572	10.1080/14786419.2019.1577840	Cytotoxic activity PC-9 - not active at 10 μM HepG-2 - not active at 10 μM
197	Colletotrichalactone A - Aa	Colletotrichum sp. JS-0361	Fungi / Ascomycota	C20H20O6	356	10.1016/j.bioorg.2020.104449	Cytotoxic activity, IC50, μM MCF-7 - 25.2
198	Colletotrichalactone B	Colletotrichum sp. JS-0361	Fungi / Ascomycota	C21H24O7	388	10.1016/j.bioorg.2020.104449	Cytotoxic activity, IC50, μM MCF-7 - >100
199	Colletotrichalactone С - Ca	Colletotrichum sp. JS-0361	Fungi / Ascomycota	C21H28O8	408	10.1016/j.bioorg.2020.104449	Cytotoxic activity, IC50, μM MCF-7 - 35.06
200	Colletoin A	Colletotrichum sp. 13S020	Fungi / Ascomycota	C22H26O4	354	10.1021/acs.jnatprod.1c00913	Cytotoxic activity, IC50, μM Saos-2 (p53R175H) - 0.36
201	Colletoin B	Colletotrichum sp. 13S020	Fungi / Ascomycota	C22H28O6	404	10.1021/acs.jnatprod.1c00913	Cytotoxic activity, IC50, μM Saos-2 (p53R175H) - 21
202	Colletoin C	Colletotrichum sp. 13S020	Fungi / Ascomycota	C22H28O7	404	10.1021/acs.jnatprod.1c00913	Cytotoxic activity, IC50, μM Saos-2 (p53R175H) - 12
203	Shikinefragalide A	Stachybotryaceae sp. FKI-9632	Fungi / Ascomycota	C22H28O7	404	10.1038/s41429-022-00512-y	Antibacterial activity B. subtilis - not active at 10 µg/disc K. rhizophila - not active at 10 µg/disc E. coli - not active at 10 µg/disc X. oryzae - not active at 10 µg/disc Antifungal activity C. albicans - not active at 10 µg/disc M. racemosus - not active at 10 µg/disc Antiparasitic activity, IC50, µM Plasmodium falciparum chloroquine-resistant strain K1 - 186.6 Plasmodium falciparum chloroqu…
204	Shikinefragalide B	Stachybotryaceae sp. FKI-9632	Fungi / Ascomycota	C22H28O7	404	10.1038/s41429-022-00512-y	Antibacterial activity B. subtilis - not active at 10 µg/disc K. rhizophila - not active at 10 µg/disc E. coli - not active at 10 µg/disc X. oryzae - not active at 10 µg/disc Antifungal activity C. albicans - not active at 10 µg/disc M. racemosus - not active at 10 µg/disc Antiparasitic activity, IC50, µM Plasmodium falciparum chloroquine-resistant strain K1 - 209.4 Plasmodium falciparum chloroqu…
205	Shikinefragalide C	Stachybotryaceae sp. FKI-9632	Fungi / Ascomycota	C22H28O8	420	10.1038/s41429-022-00512-y	Antibacterial activity B. subtilis - not active at 10 µg/disc K. rhizophila - not active at 10 µg/disc E. coli - not active at 10 µg/disc X. oryzae - not active at 10 µg/disc Antifungal activity C. albicans - not active at 10 µg/disc M. racemosus - not active at 10 µg/disc
206	Shikinefragalide D	Stachybotryaceae sp. FKI-9632	Fungi / Ascomycota	C22H28O8	420	10.1038/s41429-022-00512-y	Antibacterial activity B. subtilis - not active at 10 µg/disc K. rhizophila - not active at 10 µg/disc E. coli - not active at 10 µg/disc X. oryzae - not active at 10 µg/disc Antifungal activity C. albicans - not active at 10 µg/disc M. racemosus - not active at 10 µg/disc
207	Lithocarpin A	Phomopsis lithocarpus FS508	Fungi / Ascomycota	C37H42O11	662	10.1039/C8QO00095F	Cytotoxic activity, IC50, μM SF-268 - 35.0 ± 1.0; MCF-7 - 33.0 ± 1.9 HepG-2 - 38.1 ± 2.0
208	Lithocarpin B	Phomopsis lithocarpus FS508	Fungi / Ascomycota	C35H40O10	620	10.1039/C8QO00095F	Cytotoxic activity, IC50, μM SF-268 - 47.4 ± 0.8 MCF-7 - 52.2 ± 2.5 HepG-2 - 49.1 ± 0.3
209	Lithocarpin C	Phomopsis lithocarpus FS508	Fungi / Ascomycota	C35H42O9	606	10.1039/C8QO00095F	Cytotoxic activity, IC50, μM SF-268 - 21.6 ± 0.8 MCF-7 - 17.0 ± 0.6 HepG-2 - 19.5 ± 0.1
210	Lithocarpin D	Phomopsis lithocarpus FS508	Fungi / Ascomycota	C37H42O11	662	10.1039/C8QO00095F	Cytotoxic activity, IC50, μM SF-268 - 18.4 ± 0.2 MCF-7 - 18.5 ± 0.2 HepG-2 - 19.0 ± 0.3
211	Glabramycin A	Neosartorya glabra MF7030 and F-155,700	Fungi / Ascomycota	C22H24O6	384	10.1038/ja.2009.26	Antibacterial activity, MIC, μg/mL S. aureus ATCC 29213 - >64 S. aureus MB2865 - >64(64) S. aureus (+50% human serum) MB2865 - >64 S. pneumoniae d CL2883 - >64 S. pneumoniae e CL2883 - 32 E. faecalis CL8516 - >64 B. subtilis MB964 - >64 H. influenzae MB4572 - >64 E. coli MB2884 - >64 E. coli MB2884 - 64 Antifungall activity, MIC, μg/mL C. albicans MY1055 - >64 Showed 2–3-fold preferential inhibit…
212	Glabramycin B	Neosartorya glabra MF7030 and F-155,700	Fungi / Ascomycota	C22H26O6	386	10.1038/ja.2009.26	Antibacterial activity, MIC, μg/mL S. aureus ATCC 29213 - >64 S. aureus MB2865 - >64 S. aureus (+50% human serum) MB2865 - >64 S. pneumoniae CL2883 - 4 S. pneumoniae CL2883 - 64 E. faecalis CL8516 - >64 B. subtilis MB964 - >64 H. influenzae MB4572 - >64 E. coli MB2884 - >64 E. coli MB2884 - >64 Antifungal activity, MIC, μg/mL C. albicans MY1055 - >64
213	Glabramycin C	Neosartorya glabra MF7030 and F-155,700	Fungi / Ascomycota	C22H24O6	384	10.1038/ja.2009.26	Antibacterial activity, MIC, μg/mL S. aureus ATCC 29213 - 16 S. aureus MB2865 - 16(8) S. aureus (+50% human serum) MB2865 - >32 S. pneumoniae CL2883 - 2 S. pneumoniae CL2883 - 2 E. faecalis CL8516 - >32(32) B. subtilis MB964 - 16 H. influenzae MB4572 - >64 E. coli MB2884 - >32 E. coli MB2884 - >32 Antifungal activity, MIC, μg/mL C. albicans MY1055 - >32
214	Hypoxylide	Annulohypoxylon sp.	Fungi / Ascomycota	C20H22O8	390	10.1016/j.tetlet.2018.01.001	Not tested+A20D135:H215
